# Supplementary material for: Si–C bond cleavage by hydride complexes of rhodium and iridium: comparison of Si–C(sp2) and Si–C(sp3) activation
Source: Royal Society of Chemistry journal article supplement (doi:10.1039/c3dt32896a), 2013-01-01
Supplement: c3dt32896a.pdf [file c3dt32896a.pdf]

## Supporting Information

### Si–C Bond Cleavage by Hydride Complexes of Rhodium and Iridium: Comparison of Si–C(sp<sup>2</sup>) and Si–C(sp<sup>3</sup>) Activation

Hajime Kameo, Sho Ishii and Hiroshi Nakazawa\*

*Department of Chemistry, Graduate School of Science,  
Osaka City University, Sugimoto, Sumiyoshi-ku, Osaka 558-8585, Japan*

## Contents

|                                                                         |    |
|-------------------------------------------------------------------------|----|
| Synthesis.....                                                          | 2  |
| Study on the Selectivity of Si–C Bond Activation.....                   | 11 |
| Eyring Plot for the Reaction of <b>2</b> with <b>1</b> .....            | 14 |
| DFT Calculation for the Si–C <sub>Me</sub> Activation by <b>2</b> ..... | 16 |
| X-ray Diffraction Data.....                                             | 18 |
| NMR Spectra Data.....                                                   | 24 |
| Cartesian Coordinates.....                                              | 67 |

## Synthesis

### Preparation of $\{o\text{-(Ph}_2\text{P)C}_6\text{H}_4\}_2\text{SiMe}_2$ (**1b**)

A Schlenk tube was charged with 994 mg of  $\{o\text{-PPh}_2(\text{C}_6\text{H}_4)\}\text{Li}\cdot\text{Et}_2\text{O}$  (2.91 mmol) and 10 mL of toluene, and the solution was cooled to  $-78\text{ }^\circ\text{C}$ .  $\text{SiMe}_2\text{Cl}_2$  (152  $\mu\text{L}$ , 1.26 mmol) was added slowly to the prepared reaction solution, and the mixture was allowed to warm to room temperature. The reaction mixture was stirred at  $100\text{ }^\circ\text{C}$  for 15 h. After the mixture was then allowed to cool to room temperature, the resulting solution was filtered through a Celite pad. Removal of the volatile materials in vacuo gave a white solid. The residue was washed with hexane (5 mL  $\times$  3) and dried under vacuum to afford **1b** (635 mg, 1.09 mmol) in 87% yield as a white powder.  $^1\text{H}$  NMR (400 MHz,  $\text{C}_6\text{D}_6$ ):  $\delta$  0.91 (s, 6H,  $\text{SiCH}_3$ ), 6.97–7.14 (m, 16H,  $H_{\text{arom}}$ ), 7.17–7.38 (m, 10H,  $H_{\text{arom}}$ ), 7.88–7.90 (m, 2H,  $H_{\text{arom}}$ ).  $^{13}\text{C}\{^1\text{H}\}$  NMR (100 MHz,  $\text{CDCl}_3$ ):  $\delta$  2.7, 128.0, 128.2, 129.0, 129.2, 133.4, 135.3, 136.5, 136.6, 138.5, 143.1.  $^{29}\text{Si}\{^1\text{H}\}$  NMR (79 MHz,  $\text{CDCl}_3$ ):  $\delta$  -7.1 (t,  $J_{\text{Si-P}} = 10.7$  Hz).  $^{31}\text{P}\{^1\text{H}\}$  NMR (162 MHz,  $\text{C}_6\text{D}_6$ ):  $\delta$  -11.9 (s). Anal. Calc. for  $\text{C}_{38}\text{H}_{34}\text{P}_2\text{Si}$ : C, 78.59; H, 5.90. Found: C, 78.53; H, 6.04.

### Preparation of $\{o\text{-(Ph}_2\text{P)C}_6\text{H}_4\}_2\text{SiEt}_2$ (**1c**)

A Schlenk tube was charged with 1.27 g of  $\{o\text{-PPh}_2(\text{C}_6\text{H}_4)\}\text{Li}\cdot\text{Et}_2\text{O}$  (3.71 mmol) and 10 mL of toluene, and the solution was cooled to  $-78\text{ }^\circ\text{C}$ .  $\text{SiEt}_2\text{Cl}_2$  (263  $\mu\text{L}$ , 1.76 mmol) was added slowly to the prepared reaction solution, and the mixture was allowed to warm to room temperature. The reaction mixture was stirred at  $100\text{ }^\circ\text{C}$  for 15 h. After the mixture was then allowed to cool to room temperature, the resulting solution was filtered through a Celite pad. Removal of the volatile materials in vacuo gave a white solid. The residue was washed with hexane (3 mL  $\times$  3) and dried under vacuum to afford **1c** (640 mg, 1.05 mmol) in 60% yield as a white powder.  $^1\text{H}$  NMR (400 MHz,  $\text{C}_6\text{D}_6$ ):  $\delta$  1.08 (t,  $J_{\text{H-H}} = 7.8$  Hz, 6H,  $\text{SiCH}_2\text{CH}_3$ ), 1.95 (q,  $J_{\text{H-H}} = 7.8$  Hz, 4H,  $\text{SiCH}_2\text{CH}_3$ ), 6.92–6.96 (m, 14H,  $H_{\text{arom}}$ ), 7.01–7.05 (m, 2H,  $H_{\text{arom}}$ ), 7.08–7.14 (m, 8H,  $H_{\text{arom}}$ ), 7.33–7.36 (m, 2H,  $H_{\text{arom}}$ ), 8.27–8.29 (m, 2H,  $H_{\text{arom}}$ ).  $^{13}\text{C}\{^1\text{H}\}$  NMR (100 MHz,  $\text{CDCl}_3$ ):  $\delta$  6.8, 7.9, 128.0, 128.1, 128.2, 129.0, 133.4, 135.4, 137.2, 138.7, 143.3, 146.8.  $^{29}\text{Si}\{^1\text{H}\}$  NMR (79 MHz,  $\text{CDCl}_3$ ):  $\delta$  -9.2 (t,  $J_{\text{Si-P}} = 9.2$  Hz).  $^{31}\text{P}\{^1\text{H}\}$  NMR (162 MHz,  $\text{C}_6\text{D}_6$ ):  $\delta$  -13.0 (s). Anal. Calc. for  $\text{C}_{40}\text{H}_{38}\text{P}_2\text{Si}$ : C, 78.92; H, 6.29. Found: C, 78.53; H, 6.04.

### Preparation of $\{o\text{-(Ph}_2\text{P)C}_6\text{H}_4\}_2\text{Si(H)(Ph)}$

A Schlenk tube was charged with 681 mg of  $\{o\text{-PPh}_2(\text{C}_6\text{H}_4)\}\text{Li}\cdot\text{Et}_2\text{O}$  (1.99 mmol) and 12 mL of toluene, and the solution was cooled to  $-78\text{ }^\circ\text{C}$ .  $\text{SiPhHCl}_2$  (140  $\mu\text{L}$ , 0.951 mmol) was added slowly to the prepared reaction solution, and the mixture was allowed to warm to room temperature. The reaction mixture was stirred at  $100\text{ }^\circ\text{C}$  for 15 h. After the mixture was then allowed to cool to room temperature, the resulting solution was filtered through a Celite pad. Removal of the volatile materials in vacuo gave a white solid. The residue was washed with hexane (3 mL  $\times$  2), and dried under vacuum to afford  $\{o\text{-(Ph}_2\text{P)C}_6\text{H}_4\}_2\text{Si(H)(Ph)}$  (571 mg, 0.908 mmol) in 77% yield as a white powder.  $^1\text{H}$  NMR (400 MHz,  $\text{CDCl}_3$ ):  $\delta$  6.31 (m, 1H,  $\text{SiH}$ ), 7.06–7.47 (m, 33H,  $H_{\text{arom}}$ ).  $^{13}\text{C}\{^1\text{H}\}$  NMR (100 MHz,  $\text{CDCl}_3$ ):  $\delta$  127.8, 128.1, 128.2, 128.3, 129.2, 129.9, 133.5, 133.7, 134.4, 134.8, 136.3, 137.8, 142.8, 144.4.  $^{31}\text{P}\{^1\text{H}\}$  NMR (162 MHz,  $\text{CDCl}_3$ ):  $\delta$  -12.1 (s). Anal. Calc. for  $\text{C}_{42}\text{H}_{34}\text{P}_2\text{Si}$ : C, 80.23; H, 5.45. Found: C, 80.55; H, 5.78.

### Preparation of $\{o\text{-(Ph}_2\text{P)C}_6\text{H}_4\}_2\text{Si(H)(}p\text{-tolyl)}$

A Schlenk tube was charged with 236 mg of  $\{o\text{-PPh}_2(\text{C}_6\text{H}_4)\}\text{Li}\cdot\text{Et}_2\text{O}$  (0.691 mmol) and 5 mL of toluene, and the solution was cooled to  $-78\text{ }^\circ\text{C}$ .  $\text{SiHCl}_3$  (35.0  $\mu\text{L}$ , 0.345 mmol) was added slowly to the prepared reaction solution, and the mixture was allowed to warm to room temperature. After the reaction mixture was stirred at ambient temperature for 15 h, the resulting solution was filtered through a Celite pad. Removal of the volatile materials in vacuo gave a white solid. The residue was washed with hexane (2 mL  $\times$  2), and dried under vacuum to afford crude  $\{o\text{-(Ph}_2\text{P)C}_6\text{H}_4\}_2\text{Si(H)(Cl)}$  (197 mg, 0.336 mmol) as a white powder.  $^{31}\text{P}\{^1\text{H}\}$  NMR (162 MHz,  $\text{C}_6\text{D}_6$ ):  $\delta = -13.3$  ppm (the purity was estimated to  $\approx 95\%$ ). After the white residue was dissolved in toluene (5 mL), the solution was cooled to  $-78\text{ }^\circ\text{C}$ .  $p\text{-CH}_3\text{C}_6\text{H}_4\text{MgBr}$  (400  $\mu\text{L}$ , 1.0 M in THF, 0.400 mmol) was added slowly to the prepared reaction solution, and then the mixture was allowed to warm to room temperature. After the reaction mixture was stirred at  $100\text{ }^\circ\text{C}$  for 15 h, the mixture was allowed to cool to room temperature. To quench an excess amount of  $p\text{-CH}_3\text{C}_6\text{H}_4\text{MgBr}$ , a 0.20 mL portion of  $\text{H}_2\text{O}$  was added to the mixture at  $-78\text{ }^\circ\text{C}$ . The mixture was allowed to warm to room temperature, and then the solution was stirred at room temperature for 2 h. After removing the volatile materials under vacuum, the residue was dissolved in benzene (20 mL). The resulting solution was filtered through a Celite pad, and removal of the volatile materials in vacuo gave a white solid. The residue was washed with  $\text{Et}_2\text{O}$  (2 mL  $\times$  3), and dried under vacuum to afford  $\{o\text{-(Ph}_2\text{P)C}_6\text{H}_4\}_2\text{Si(H)(}p\text{-tolyl)}$  (185 mg, 0.288 mmol) in 86% yield as a white powder.  $^1\text{H}$  NMR (400 MHz,  $\text{C}_6\text{D}_6$ ):  $\delta$  2.07 (s, 3H,  $p\text{-CH}_3\text{C}_6\text{H}_4$ ), 6.80 (m, 1H, SiH), 6.94–7.06 (m, 19H,  $H_{\text{arom}}$ ), 7.23–7.39 (m, 9H,  $H_{\text{arom}}$ ), 7.54–7.56 (m, 2H,  $H_{\text{arom}}$ ), 7.65–7.67 (m, 2H,  $H_{\text{arom}}$ ).  $^{13}\text{C}\{^1\text{H}\}$  NMR (100 MHz,  $\text{CDCl}_3$ ):  $\delta$  21.7, 128.1, 128.2, 128.5, 129.9, 133.5, 133.6, 133.8, 134.4, 136.4, 137.7, 137.8, 139.0, 142.8, 144.4.  $^{31}\text{P}\{^1\text{H}\}$  NMR (162 MHz,  $\text{C}_6\text{D}_6$ ):  $\delta -11.9$  (s). Anal. Calc. for  $\text{C}_{43}\text{H}_{36}\text{P}_2\text{Si}$ : C, 80.35; H, 5.65. Found: C, 80.08; H, 5.81.

### Preparation of $\{o\text{-(Ph}_2\text{P)C}_6\text{H}_4\}_2\text{Si(H)(}p\text{-methoxyphenyl)}$

A Schlenk tube was charged with 150 mg of  $\{o\text{-PPh}_2(\text{C}_6\text{H}_4)\}\text{Li}\cdot\text{Et}_2\text{O}$  (0.440 mmol) and 5 mL of toluene, and the solution was cooled to  $-78\text{ }^\circ\text{C}$ .  $\text{SiHCl}_3$  (22.3  $\mu\text{L}$ , 0.220 mmol) was added slowly to the prepared reaction solution, and the mixture was allowed to warm to room temperature. After the reaction mixture was stirred at ambient temperature for 15 h, the resulting solution was filtered through a Celite pad. Removal of the volatile materials in vacuo gave a white solid. The residue was washed with hexane (2 mL  $\times$  2), and dried under vacuum to afford crude  $\{o\text{-(Ph}_2\text{P)C}_6\text{H}_4\}_2\text{Si(H)(Cl)}$  (126 mg, 0.214 mmol) as a white powder. After the white residue was dissolved in THF (2.5 mL), the solution was cooled to  $-78\text{ }^\circ\text{C}$ .  $p\text{-(MeO)C}_6\text{H}_4\text{MgBr}$  (514  $\mu\text{L}$ , 0.5 M in THF, 0.257 mmol) was added slowly to the prepared reaction solution, and then the mixture was allowed to warm to room temperature. After the reaction mixture was stirred at  $60\text{ }^\circ\text{C}$  for 20 h, the mixture was allowed to cool to room temperature. To quench an excess amount of  $p\text{-(MeO)C}_6\text{H}_4\text{MgBr}$ , a 0.20 mL portion of  $\text{H}_2\text{O}$  was added to the mixture at  $-78\text{ }^\circ\text{C}$ . The mixture was allowed to warm to room temperature, and then the solution was stirred at room temperature for 2 h. After removing the volatile materials under vacuum, the residue was dissolved in benzene (15 mL). The resulting solution was filtered through a Celite pad, and removal of the volatile materials in vacuo gave a white solid. The residue was washed with  $\text{Et}_2\text{O}$  (1.5 mL  $\times$  2), and dried under vacuum to afford  $\{o\text{-(Ph}_2\text{P)C}_6\text{H}_4\}_2\text{Si(H)(}p\text{-methoxyphenyl)}$  (116 mg, 0.176 mmol) in 82% yield as a white powder.  $^1\text{H}$  NMR (400

MHz, CDCl<sub>3</sub>):  $\delta$  3.78 (s, 3H, *p*-CH<sub>3</sub>OC<sub>6</sub>H<sub>4</sub>), 6.25 (m, 1H, SiH), 6.74–6.76 (m, 2H, *H*<sub>arom</sub>), 7.04–7.38 (m, 30H, *H*<sub>arom</sub>). <sup>13</sup>C{<sup>1</sup>H} NMR (100 MHz, CDCl<sub>3</sub>):  $\delta$  55.2, 128.3, 128.4, 128.5, 130.0, 133.7, 133.8, 134.0, 134.6, 137.8, 138.0, 138.1, 142.9, 143.4, 144.5. <sup>31</sup>P{<sup>1</sup>H} NMR (162 MHz, C<sub>6</sub>D<sub>6</sub>):  $\delta$  -12.1 (s). Anal. Calc. for C<sub>43</sub>H<sub>36</sub>OP<sub>2</sub>Si: C, 78.40; H, 5.51. Found: C, 77.98; H, 5.64.

#### Preparation of *o*-(Ph<sub>2</sub>P)C<sub>6</sub>H<sub>4</sub>)}<sub>2</sub>Si(H)(*p*-dimethylaminophenyl)

A Schlenk tube was charged with 188 mg of *o*-PPh<sub>2</sub>(C<sub>6</sub>H<sub>4</sub>)Li·Et<sub>2</sub>O (0.549 mmol) and 5 mL of toluene, and the solution was cooled to -78 °C. SiHCl<sub>3</sub> (27.3  $\mu$ L, 0.2705 mmol) was added slowly to the prepared reaction solution, and the mixture was allowed to warm to room temperature. After the reaction mixture was stirred at ambient temperature for 15 h, the resulting solution was filtered through a Celite pad. Removal of the volatile materials in vacuo gave a white solid. The residue was washed with hexane (2 mL  $\times$  2), and dried under vacuum to afford crude *o*-(Ph<sub>2</sub>P)C<sub>6</sub>H<sub>4</sub>)}<sub>2</sub>Si(H)(Cl) (166 mg, 0.283 mmol) as a white powder. After the white residue was dissolved in toluene (3 mL), the solution was cooled to -78 °C. *p*-(Me<sub>2</sub>N)C<sub>6</sub>H<sub>4</sub>MgBr (680  $\mu$ L, 0.5 M in THF, 0.340 mmol) was added slowly to the prepared reaction solution, and then the mixture was allowed to warm to room temperature. After the reaction mixture was stirred at 110 °C for 15 h, the mixture was allowed to cool to room temperature. To quench an excess amount of *p*-(Me<sub>2</sub>N)C<sub>6</sub>H<sub>4</sub>MgBr, a 0.20 mL portion of H<sub>2</sub>O was added to the mixture at -78 °C. The mixture was allowed to warm to room temperature, and then the solution was stirred at room temperature for 2 h. After removing the volatile materials under vacuum, the residue was dissolved in benzene (15 mL). The resulting solution was filtered through a Celite pad, and removal of the volatile materials in vacuo gave a white solid. The residue was washed with Et<sub>2</sub>O (1.5 mL  $\times$  2), and dried under vacuum to afford *o*-(Ph<sub>2</sub>P)C<sub>6</sub>H<sub>4</sub>)}<sub>2</sub>Si(H)(*p*-dimethylaminophenyl) (142 mg, 0.212 mmol) in 75% yield as a white powder. <sup>1</sup>H NMR (400 MHz, CDCl<sub>3</sub>):  $\delta$  2.46 (s, 6H, *p*-(CH<sub>3</sub>)<sub>2</sub>NC<sub>6</sub>H<sub>4</sub>), 6.50–6.52 (m, 2H, *H*<sub>arom</sub>), 6.84 (m, 1H, SiH), 6.99–7.08 (m, 16H, *H*<sub>arom</sub>), 7.25–7.40 (m, 10H, *H*<sub>arom</sub>), 7.57–7.59 (m, 2H, *H*<sub>arom</sub>), 7.75–7.76 (m, 2H, *H*<sub>arom</sub>). <sup>13</sup>C{<sup>1</sup>H} NMR (100 MHz, CDCl<sub>3</sub>):  $\delta$  40.4, 128.0, 128.2, 129.7, 133.5, 133.7, 133.8, 134.3, 137.5, 137.8, 138.1, 143.4, 143.9, 144.4, 151.2. <sup>31</sup>P{<sup>1</sup>H} NMR (162 MHz, C<sub>6</sub>D<sub>6</sub>):  $\delta$  -12.0 (s). Anal. Calc. for C<sub>44</sub>H<sub>39</sub>NP<sub>2</sub>Si: C, 78.66; H, 5.85; N, 2.08. Found: C, 78.65; H, 6.13; N, 1.90.

#### Preparation of *o*-(Ph<sub>2</sub>P)C<sub>6</sub>H<sub>4</sub>)}<sub>2</sub>Si(H)(*p*-fluorophenyl)

A Schlenk tube was charged with 131 mg of *o*-PPh<sub>2</sub>(C<sub>6</sub>H<sub>4</sub>)Li·Et<sub>2</sub>O (0.386 mmol) and 2 mL of toluene, and the solution was cooled to -78 °C. SiHCl<sub>3</sub> (19.0  $\mu$ L, 0.192 mmol) was added slowly to the prepared reaction solution, and the mixture was allowed to warm to room temperature. After the reaction mixture was stirred at ambient temperature for 15 h, the resulting solution was filtered through a Celite pad. Removal of the volatile materials in vacuo gave a white solid. The residue was washed with hexane (1 mL  $\times$  2), and dried under vacuum to afford crude *o*-(Ph<sub>2</sub>P)C<sub>6</sub>H<sub>4</sub>)}<sub>2</sub>Si(H)(Cl) (109 mg, 0.186 mmol) as a white powder. After the white residue was dissolved in toluene (4 mL), the solution was cooled to -78 °C. *p*-FC<sub>6</sub>H<sub>4</sub>MgBr (240  $\mu$ L, 0.90 M in THF, 0.223 mmol) was added slowly to the prepared reaction solution, and then the mixture was allowed to warm to room temperature. After the reaction mixture was stirred at 100 °C for 15 h, the mixture was allowed to cool to room temperature. To quench an excess amount of *p*-FC<sub>6</sub>H<sub>4</sub>MgBr, a 0.20 mL portion of H<sub>2</sub>O was added to the mixture at -78 °C. After the mixture

was allowed to warm to room temperature, the solution was stirred at room temperature for 2 h. After removing the volatile materials under vacuum, the residue was dissolved in benzene (15 mL). The resulting solution was filtered through a Celite pad, and removal of the volatile materials in vacuo gave a white solid. The residue was washed with Et<sub>2</sub>O (2 mL × 3), and dried under vacuum to afford {*o*-(Ph<sub>2</sub>P)C<sub>6</sub>H<sub>4</sub>}<sub>2</sub>Si(H)(*p*-fluorophenyl) (97.6 mg, 0.151 mmol) in 81% yield as a white powder. <sup>1</sup>H NMR (400 MHz, CDCl<sub>3</sub>): δ 6.30 (m, 1H, SiH), 6.88–6.92 (m, 2H, H<sub>arom</sub>), 7.07–7.41 (m, 30H, H<sub>arom</sub>). <sup>13</sup>C{<sup>1</sup>H} NMR (100 MHz, CDCl<sub>3</sub>): δ 128.2, 128.3, 128.4, 128.5, 130.1, 133.5, 133.7, 133.8, 134.5, 137.5, 137.7, 138.2, 142.3, 144.4. <sup>19</sup>F{<sup>1</sup>H} NMR (376 MHz, CDCl<sub>3</sub>): δ –110.4 (s). <sup>31</sup>P{<sup>1</sup>H} NMR (162 MHz, CDCl<sub>3</sub>): δ –12.1 (s). Anal. Calc. for C<sub>42</sub>H<sub>33</sub>FP<sub>2</sub>Si: C, 78.00; H, 5.14. Found: C, 77.58; H, 5.44.

#### Preparation of {*o*-(Ph<sub>2</sub>P)C<sub>6</sub>H<sub>4</sub>}<sub>2</sub>Si(Me)(Ph) (4b)

A Schlenk tube was charged with 479 mg of {*o*-PPh<sub>2</sub>(C<sub>6</sub>H<sub>4</sub>)}Li·Et<sub>2</sub>O (1.40 mmol) and 7.5 mL of toluene, and the solution was cooled to –78 °C. SiMePhCl<sub>2</sub> (113 μL, 0.698 mmol) was added slowly to the prepared reaction solution, and the mixture was allowed to warm to room temperature. The reaction mixture was stirred at 100 °C for 15 h. The mixture was then allowed to cool to room temperature, and the resulting solution was filtered through a Celite pad. Removal of the volatile materials in vacuo gave a white solid. The residue was washed with Et<sub>2</sub>O (2 mL × 2), and dried under vacuum to afford **4b** (282 mg, 0.439 mmol) in 63% yield as a white powder. <sup>1</sup>H NMR (400 MHz, CDCl<sub>3</sub>): δ 1.05 (m, 3H, SiCH<sub>3</sub>), 7.01–7.45 (m, 33H, H<sub>arom</sub>). <sup>13</sup>C{<sup>1</sup>H} NMR (100 MHz, CDCl<sub>3</sub>): δ 4.3, 127.7, 128.1, 128.3, 128.9, 129.5, 133.4, 135.8, 138.1, 138.3, 138.4, 138.5, 143.6, 146.0, 146.4. <sup>31</sup>P{<sup>1</sup>H} NMR (162 MHz, CDCl<sub>3</sub>): δ –11.3 (s). Anal. Calc. for C<sub>43</sub>H<sub>36</sub>P<sub>2</sub>Si: C, 80.35; H, 5.65. Found: C, 80.40; H, 5.82.

#### Preparation of {*o*-(Ph<sub>2</sub>P)C<sub>6</sub>H<sub>4</sub>}<sub>2</sub>Si(Me)(Et) (4c)

A Schlenk tube was charged with 591 mg of {*o*-PPh<sub>2</sub>(C<sub>6</sub>H<sub>4</sub>)}Li·Et<sub>2</sub>O (1.73 mmol) and 7.5 mL of toluene, and the solution was cooled to –78 °C. SiMeEtCl<sub>2</sub> (110 μL, 0.817 mmol) was added slowly to the prepared reaction solution, and the mixture was allowed to warm to room temperature. The reaction mixture was stirred at 100 °C for 15 h. The mixture was then allowed to cool to room temperature, and the resulting solution was filtered through a Celite pad. Removal of the volatile materials in vacuo gave a white solid. The residue was washed with Et<sub>2</sub>O (2 mL × 2), and dried under vacuum to afford **4c** (429 mg, 0.722 mmol) in 88% yield as a white powder. <sup>1</sup>H NMR (400 MHz, C<sub>6</sub>D<sub>6</sub>): δ 0.92 (s, 3H, SiCH<sub>3</sub>), 0.99 (t, J<sub>H-H</sub> = 7.8 Hz, 3H, SiCH<sub>2</sub>CH<sub>3</sub>), 1.57 (q, J<sub>H-H</sub> = 7.8 Hz, 2H, SiCH<sub>2</sub>CH<sub>3</sub>), 6.98–7.06 (m, 16H, H<sub>arom</sub>), 7.11–7.18 (m, 8H, H<sub>arom</sub>), 7.35–7.38 (m, 2H, H<sub>arom</sub>), 7.91–7.93 (m, 2H, H<sub>arom</sub>). <sup>13</sup>C{<sup>1</sup>H} NMR (100 MHz, CDCl<sub>3</sub>): δ 0.12, 8.1, 9.4, 128.0, 128.2, 129.1, 133.3, 133.5, 135.4, 136.8, 138.6, 143.2, 147.5. <sup>31</sup>P{<sup>1</sup>H} NMR (162 MHz, C<sub>6</sub>D<sub>6</sub>): δ –12.3 (s). Anal. Calc. for C<sub>39</sub>H<sub>36</sub>P<sub>2</sub>Si: C, 78.76; H, 6.10. Found: C, 78.42; H, 6.17.

#### Preparation of {*o*-(Ph<sub>2</sub>P)C<sub>6</sub>H<sub>4</sub>}<sub>2</sub>Si(Me)(*p*-tolyl) (4d)

A Schlenk tube was charged with 139 mg of {*o*-PPh<sub>2</sub>(C<sub>6</sub>H<sub>4</sub>)}Li·Et<sub>2</sub>O (0.406 mmol) and 2 mL of toluene, and the solution was cooled to –78 °C. SiMeCl<sub>3</sub> (24.0 μL, 0.203 mmol) was added slowly to the prepared reaction solution, and the mixture was allowed to warm to room temperature. The reaction mixture was stirred at 100 °C for 15 h. The mixture was then allowed to cool to room temperature, and the resulting solution was filtered through a Celite

pad. Removal of the volatile materials in vacuo gave a white solid. The residue was washed with hexane (1 mL × 2) and dried under vacuum to afford  $\{o\text{-(Ph}_2\text{P)C}_6\text{H}_4\}_2\text{Si(Me)(Cl)}$  (87.7 mg, 0.146 mmol, 72%) in  $\approx$  99% purity (see Figure S19).  $^1\text{H NMR}$  (400 MHz,  $\text{C}_6\text{D}_6$ ):  $\delta$  1.41 (m, 3H,  $\text{SiCH}_3$ ), 6.95–7.04 (m, 17H,  $H_{\text{arom}}$ ), 7.08–7.15 (m, 7H,  $H_{\text{arom}}$ ), 7.32–7.35 (m, 2H,  $H_{\text{arom}}$ ), 8.25–8.27 (m, 2H,  $H_{\text{arom}}$ ).  $^{13}\text{C NMR}$  (100 MHz,  $\text{CDCl}_3$ ):  $\delta$  7.6, 128.3, 128.9, 130.4, 133.3, 135.3, 136.9, 137.4, 137.8, 142.7, 145.2.  $^{31}\text{P NMR}$  (162 MHz,  $\text{C}_6\text{D}_6$ ):  $\delta$  –12.7 (s).

A Schlenk tube was filled with 87.7 mg of  $\{o\text{-(Ph}_2\text{P)C}_6\text{H}_4\}_2\text{Si(Me)(Cl)}$  (0.146 mmol) and 4 mL of toluene, and the solution was cooled to  $-78^\circ\text{C}$ .  $p\text{-CH}_3\text{C}_6\text{H}_4\text{MgBr}$  (219  $\mu\text{L}$ , 1.0 M in THF, 0.219 mmol) was added slowly to the prepared reaction solution, and the mixture was allowed to warm to room temperature. After the reaction mixture was stirred at  $100^\circ\text{C}$  for 15 h, the mixture was then allowed to cool to room temperature. To quench an excess amount of  $p\text{-CH}_3\text{C}_6\text{H}_4\text{MgBr}$ , a 0.20 mL portion of  $\text{H}_2\text{O}$  was added to the mixture at  $-78^\circ\text{C}$ . The mixture was allowed to warm to room temperature, and then the solution was stirred at room temperature for 2 h. After removing the volatile materials under vacuum, the residue was dissolved in benzene (15 mL). The resulting solution was filtered through a Celite pad, and removal of the volatile materials in vacuo gave a white solid. The residue was washed with  $\text{Et}_2\text{O}$  (2 mL × 3), and dried under vacuum to afford **4d** (66.3 mg, 0.101 mmol) in 69% yield as a white powder.  $^1\text{H NMR}$  (400 MHz,  $\text{C}_6\text{D}_6$ ):  $\delta$  1.41 (m, 3H,  $\text{SiCH}_3$ ), 2.11 (s, 3H,  $p\text{-CH}_3\text{C}_6\text{H}_4$ ), 6.95–7.06 (m, 16H,  $H_{\text{arom}}$ ), 7.16–7.22 (m, 7H,  $H_{\text{arom}}$ ), 7.29–7.33 (m, 3H,  $H_{\text{arom}}$ ), 7.45–7.48 (m, 2H,  $H_{\text{arom}}$ ), 7.53–7.55 (m, 2H,  $H_{\text{arom}}$ ), 7.71–7.73 (m, 2H,  $H_{\text{arom}}$ ).  $^{13}\text{C}\{^1\text{H}\}$  NMR (100 MHz,  $\text{CDCl}_3$ ):  $\delta$  4.2, 21.7, 128.0, 128.2, 128.5, 129.4, 133.3, 133.5, 134.9, 135.9, 138.0, 138.4, 138.6, 143.5, 146.1, 146.6.  $^{31}\text{P}\{^1\text{H}\}$  NMR (162 MHz,  $\text{C}_6\text{D}_6$ ):  $\delta$  –11.2 (s). Anal. Calc. for  $\text{C}_{44}\text{H}_{38}\text{P}_2\text{Si}$ : C, 80.46; H, 5.83. Found: C, 80.33; H, 6.00.

#### Preparation of $\{o\text{-(Ph}_2\text{P)C}_6\text{H}_4\}_2\text{Si(Me)(p-methoxyphenyl)}$ (**4e**)

$\{o\text{-(Ph}_2\text{P)C}_6\text{H}_4\}_2\text{Si(Me)(Cl)}$  was prepared in a manner similar to that reported in the section “Preparation of  $\{o\text{-(Ph}_2\text{P)C}_6\text{H}_4\}_2\text{Si(Me)(p-tolyl)}$  (**4d**).” A Schlenk tube was charged with 99.2 mg of  $\{o\text{-(Ph}_2\text{P)C}_6\text{H}_4\}_2\text{Si(Me)(Cl)}$  (0.165 mmol) and 2 mL of THF, and the solution was cooled to  $-78^\circ\text{C}$ .  $p\text{-(MeO)C}_6\text{H}_4\text{MgBr}$  (396  $\mu\text{L}$ , 0.5 M in THF, 0.198 mmol) was added slowly to the prepared reaction solution, and the mixture was allowed to warm to room temperature. After the reaction mixture was stirred at  $60^\circ\text{C}$  for 20 h, the mixture was then allowed to cool to room temperature. To quench an excess amount of  $p\text{-(MeO)C}_6\text{H}_4\text{MgBr}$ , a 0.20 mL portion of  $\text{H}_2\text{O}$  was added to the mixture at  $-78^\circ\text{C}$ . The mixture was allowed to warm to room temperature, and then the solution was stirred at room temperature for 2 h. After removing the volatile materials under vacuum, the residue was dissolved in benzene (15 mL). The resulting solution was filtered through a Celite pad, and removal of the volatile materials in vacuo gave a white solid. The residue was washed with  $\text{Et}_2\text{O}$  (1.5 mL × 2), and dried under vacuum to afford **4e** (85.9 mg, 0.128 mmol) in 77% yield as a white powder.  $^1\text{H NMR}$  (400 MHz,  $\text{C}_6\text{D}_6$ ):  $\delta$  1.42 (m, 3H,  $\text{SiCH}_3$ ), 3.30 (s, 3H,  $p\text{-CH}_3\text{OC}_6\text{H}_4$ ), 6.72–7.75 (m, 2H,  $H_{\text{arom}}$ ), 6.99–7.07 (m, 18H,  $H_{\text{arom}}$ ), 7.21–7.24 (m, 2H,  $H_{\text{arom}}$ ), 7.30–7.34 (m, 4H,  $H_{\text{arom}}$ ), 7.46–7.51 (m, 4H,  $H_{\text{arom}}$ ), 7.71–7.73 (m, 2H,  $H_{\text{arom}}$ ).  $^{13}\text{C}\{^1\text{H}\}$  NMR (100 MHz,  $\text{CDCl}_3$ ):  $\delta$  4.29, 55.1, 128.1, 128.2, 128.3, 129.5, 133.4, 133.6, 135.9, 137.4, 138.0, 138.1, 138.5, 143.6, 146.3, 146.8.  $^{31}\text{P}\{^1\text{H}\}$  NMR (162 MHz,  $\text{C}_6\text{D}_6$ ):  $\delta$  –11.1 (s). Anal. Calc. for  $\text{C}_{44}\text{H}_{38}\text{OP}_2\text{Si}$ : C, 78.55; H, 5.69. Found: C, 78.59; H, 5.66.



#### Preparation of $\{o\text{-(Ph}_2\text{P)C}_6\text{H}_4\}_2\text{Si(Me)(}p\text{-dimethylaminophenyl)}\text{(4f)}$

$\{o\text{-(Ph}_2\text{P)C}_6\text{H}_4\}_2\text{Si(Me)(Cl)}$  was prepared in a manner similar to that reported in the section “Preparation of  $\{o\text{-(Ph}_2\text{P)C}_6\text{H}_4\}_2\text{Si(Me)(}p\text{-tolyl)}\text{(4d)}$ .” A Schlenk tube was charged with 90.3 mg of  $\{o\text{-(Ph}_2\text{P)C}_6\text{H}_4\}_2\text{Si(Me)(Cl)}$  (0.150 mmol) and 2.5 mL of toluene, and the solution was cooled to  $-78\text{ }^\circ\text{C}$ .  $p\text{-(Me}_2\text{N)C}_6\text{H}_4\text{MgBr}$  (360  $\mu\text{L}$ , 0.5 M in THF, 0.180 mmol) was added slowly to the prepared reaction solution, and the mixture was allowed to warm to room temperature. After the reaction mixture was stirred at  $110\text{ }^\circ\text{C}$  for 15 h, the mixture was then allowed to cool to room temperature. To quench an excess amount of  $p\text{-(Me}_2\text{N)C}_6\text{H}_4\text{MgBr}$ , a 0.20 mL portion of  $\text{H}_2\text{O}$  was added to the mixture at  $-78\text{ }^\circ\text{C}$ . The mixture was allowed to warm to room temperature, and then the solution was stirred at room temperature for 2 h. After removing the volatile materials under vacuum, the residue was dissolved in benzene (15 mL). The resulting solution was filtered through a Celite pad, and removal of the volatile materials in vacuo gave a white solid. The residue was washed with hexane (1.5 mL  $\times$  2), and dried under vacuum to afford **4f** (78.1 mg, 0.114 mmol) in 76% yield as a white powder.  $^1\text{H NMR}$  (400 MHz,  $\text{C}_6\text{D}_6$ ):  $\delta$  1.46 (m, 3H,  $\text{SiCH}_3$ ), 2.50 (s, 6H,  $p\text{-(CH}_3)_2\text{NC}_6\text{H}_4$ ), 6.52–6.54 (m, 2H,  $H_{\text{arom}}$ ), 6.98–7.55 (m, 28H,  $H_{\text{arom}}$ ), 7.79–7.81 (m, 2H,  $H_{\text{arom}}$ ).  $^{13}\text{C}\{^1\text{H}\}$  NMR (100 MHz,  $\text{CDCl}_3$ ):  $\delta$  4.33, 40.4, 128.1, 128.2, 128.3, 128.5, 129.3, 133.4, 133.6, 134.9, 135.8, 137.0, 138.1, 138.8, 143.5, 147.1.  $^{31}\text{P}\{^1\text{H}\}$  NMR (162 MHz,  $\text{C}_6\text{D}_6$ ):  $\delta$   $-11.1$  (s). HRMS (FAB+):  $[\text{M}]^+$  Calc. for  $\text{C}_{45}\text{H}_{41}\text{NP}_2\text{Si}$ : 685.2483; Found: 685.2471. Anal. Calc. for  $\text{C}_{45}\text{H}_{41}\text{NP}_2\text{Si}$ : C, 78.80; H, 6.03; N, 2.04. Found: C, 78.52; H, 6.28; N, 2.07.

#### Preparation of $\{o\text{-(Ph}_2\text{P)C}_6\text{H}_4\}_2\text{Si(Me)(}p\text{-fluorophenyl)}\text{(4g)}$

$\{o\text{-(Ph}_2\text{P)C}_6\text{H}_4\}_2\text{Si(Me)(Cl)}$  was prepared in a manner similar to that reported in the section “Preparation of  $\{o\text{-(Ph}_2\text{P)C}_6\text{H}_4\}_2\text{Si(Me)(}p\text{-tolyl)}\text{(4d)}$ .” A Schlenk tube was charged with 78.2 mg of  $\{o\text{-(Ph}_2\text{P)C}_6\text{H}_4\}_2\text{Si(Me)(Cl)}$  (0.130 mmol) and 4 mL of toluene, and the solution was cooled to  $-78\text{ }^\circ\text{C}$ .  $p\text{-FC}_6\text{H}_4\text{MgBr}$  (173  $\mu\text{L}$ , 0.9 M in THF, 0.156 mmol) was added slowly to the prepared reaction solution, and the mixture was allowed to warm to room temperature. After the reaction mixture was stirred at  $100\text{ }^\circ\text{C}$  for 15 h, the mixture was then allowed to cool to room temperature. To quench an excess amount of  $p\text{-FC}_6\text{H}_4\text{MgBr}$ , a 0.20 mL portion of  $\text{H}_2\text{O}$  was added to the mixture at  $-78\text{ }^\circ\text{C}$ . The mixture was allowed to warm to room temperature, and then the solution was stirred at room temperature for 2 h. After removing the volatile materials under vacuum, the residue was dissolved in benzene (15 mL). The resulting solution was filtered through a Celite pad, and removal of the volatile materials in vacuo gave a white solid. The residue was washed with  $\text{Et}_2\text{O}$  (2 mL  $\times$  3), and dried under vacuum to afford **4g** in 77% yield as a white powder.  $^1\text{H NMR}$  (400 MHz,  $\text{C}_6\text{D}_6$ ):  $\delta$  1.36 (m, 3H,  $\text{SiCH}_3$ ), 6.96–7.07 (m, 16H,  $H_{\text{arom}}$ ), 7.17–7.20 (m, 7H,  $H_{\text{arom}}$ ), 7.26–7.30 (m, 3H,  $H_{\text{arom}}$ ), 7.34–7.38 (m, 2H,  $H_{\text{arom}}$ ), 7.44–7.47 (m, 2H,  $H_{\text{arom}}$ ), 7.60–7.62 (m, 2H,  $H_{\text{arom}}$ ).  $^{13}\text{C}\{^1\text{H}\}$  NMR (100 MHz,  $\text{CDCl}_3$ ):  $\delta$  4.21, 128.2, 128.3, 128.4, 129.6, 133.3, 133.5, 134.2, 135.9, 137.7, 137.9, 138.3, 143.6, 145.6, 146.0.  $^{19}\text{F}\{^1\text{H}\}$  NMR (376 MHz,  $\text{C}_6\text{D}_6$ ):  $\delta$   $-110.6$  (s).  $^{31}\text{P}\{^1\text{H}\}$  NMR (162 MHz,  $\text{C}_6\text{D}_6$ ):  $\delta$   $-11.2$  (s). Anal. Calc. for  $\text{C}_{43}\text{H}_{35}\text{FP}_2\text{Si}$ : C, 78.16; H, 5.34. Found: C, 77.72; H, 5.68.

#### Preparation of $\{o\text{-(Ph}_2\text{PC}_6\text{H}_4)_2\text{(Me)Si}\}\text{Rh(CO)(PPh}_3\text{)}\text{(3b)}$

A 50-mL Schlenk tube was charged with **1b** (196 mg, 0.338 mmol),  $\text{RhH(CO)(PPh}_3\text{)}_3$  (**2**) (310 mg, 0.338 mmol), and toluene (10 mL), and the reaction mixture was stirred at  $50\text{ }^\circ\text{C}$  for 8 h. The solvent was then removed under

reduced pressure to give a pale orange solid. The residue was washed with hexane (3 mL × 3) and dried under vacuum to afford 296 mg of **3b** (0.0496 mmol) as an orange powder in 91% yield. <sup>1</sup>H NMR (400 MHz, C<sub>6</sub>D<sub>6</sub>): δ 1.46 (s, 3H, SiCH<sub>3</sub>), 6.40–6.41 (m, 4H, H<sub>arom</sub>), 6.70–7.10 (m, 30H, H<sub>arom</sub>), 7.18–7.30 (m, 3H, H<sub>arom</sub>), 7.65–7.67 (m, 4H, H<sub>arom</sub>), 7.83–7.85 (m, 2H, H<sub>arom</sub>). <sup>13</sup>C{<sup>1</sup>H} NMR (100 MHz, CDCl<sub>3</sub>): δ 4.5, 127.6, 127.8, 128.3, 128.7, 129.0, 131.0, 132.6, 133.5, 134.6, 137.4, 139.5, 140.5, 149.7, 155.1, 204.3. <sup>31</sup>P{<sup>1</sup>H} NMR (162 MHz, C<sub>6</sub>D<sub>6</sub>): δ 32.3 (dt, J<sub>P-Rh</sub> = 95.5 Hz, J<sub>P-P</sub> = 34.9 Hz, PPh<sub>3</sub>), 49.2 (dd, J<sub>P-Rh</sub> = 145.0 Hz, J<sub>P-P</sub> = 34.9 Hz, PPh<sub>2</sub>). IR (KBr): 1897 cm<sup>-1</sup> (ν<sub>C=O</sub>). Anal. Calc. for C<sub>56</sub>H<sub>46</sub>OP<sub>3</sub>RhSi: C, 70.14; H, 4.84. Found: C, 69.96; H, 5.24.

#### Preparation of {(*o*-Ph<sub>2</sub>PC<sub>6</sub>H<sub>4</sub>)<sub>2</sub>(Et)Si}Rh(CO)(PPh<sub>3</sub>) (**3c**)

A 50-mL Schlenk tube was charged with **1c** (174 mg, 0.286 mmol), RhH(CO)(PPh<sub>3</sub>)<sub>3</sub> (**2**) (263 mg, 0.286 mmol), and toluene (7 mL), and the reaction mixture was stirred at 50 °C for 10 h. The solvent was then removed under reduced pressure to give a pale orange solid. The residue was washed with hexane (3 mL × 3) and dried under vacuum to afford 258 mg of **3c** (0.265 mmol) as an orange powder in 93% yield. <sup>1</sup>H NMR (400 MHz, C<sub>6</sub>D<sub>6</sub>): δ 1.53 (t, J<sub>H-H</sub> = 7.8 Hz, 3H, SiCH<sub>2</sub>CH<sub>3</sub>), 2.02 (q, J<sub>H-H</sub> = 7.8 Hz, 2H, SiCH<sub>2</sub>CH<sub>3</sub>), 6.58–6.59 (m, 4H, H<sub>arom</sub>), 6.68–6.72 (m, 6H, H<sub>arom</sub>), 6.78–7.13 (m, 25 H, H<sub>arom</sub>), 7.31–7.33 (m, 2H, H<sub>arom</sub>), 7.56–7.57 (m, 4H, H<sub>arom</sub>), 7.93–7.65 (m, 2H, H<sub>arom</sub>). <sup>13</sup>C{<sup>1</sup>H} NMR (100 MHz, CDCl<sub>3</sub>): δ 10.0, 13.2, 127.6, 127.9, 128.4, 128.8, 129.0, 131.5, 132.6, 133.4, 134.6, 137.1, 139.8, 141.1, 150.1, 154.4, 203.7. <sup>29</sup>Si{<sup>1</sup>H} NMR (79 MHz, CDCl<sub>3</sub>): δ 64.3 (m). <sup>31</sup>P{<sup>1</sup>H} NMR (162 MHz, C<sub>6</sub>D<sub>6</sub>): δ 31.2 (dt, J<sub>P-Rh</sub> = 94.2 Hz, J<sub>P-P</sub> = 34.3 Hz, PPh<sub>3</sub>), 49.7 (dd, J<sub>P-Rh</sub> = 145.0 Hz, J<sub>P-P</sub> = 34.3 Hz, PPh<sub>2</sub>). IR (KBr): 1923 cm<sup>-1</sup> (ν<sub>C=O</sub>). Anal. Calc. for C<sub>57</sub>H<sub>48</sub>OP<sub>3</sub>RhSi: C, 70.37; H, 4.97. Found: C, 70.03; H, 5.29.

#### Preparation of {(*o*-Ph<sub>2</sub>PC<sub>6</sub>H<sub>4</sub>)<sub>2</sub>(*p*-tolyl)Si}Rh(CO)(PPh<sub>3</sub>) (**3d**)

A 50-mL Schlenk tube was charged with {*o*-(Ph<sub>2</sub>P)C<sub>6</sub>H<sub>4</sub>}<sub>2</sub>Si(H)(*p*-tolyl) (39.1 mg, 0.0608 mmol), RhH(CO)(PPh<sub>3</sub>)<sub>3</sub> (**2**) (55.9 mg, 0.0608 mmol), and toluene (3 mL), and the reaction mixture was stirred at 80 °C for 5 h. The solvent was then removed under reduced pressure to give a pale orange solid. The residue was washed with hexane (1.5 mL × 3) and dried under vacuum to afford 46.4 mg of **3d** (0.0448 mmol) as an orange powder in 74% yield. <sup>1</sup>H NMR (400 MHz, C<sub>6</sub>D<sub>6</sub>): δ 2.21 (s, 3H, *p*-CH<sub>3</sub>C<sub>6</sub>H<sub>4</sub>), 6.44–6.48 (m, 2H, H<sub>arom</sub>), 6.67–7.12 (m, 38H, H<sub>arom</sub>), 7.36–7.38 (m, 2H, H<sub>arom</sub>), 7.64–7.65 (m, 3H, H<sub>arom</sub>), 7.87–7.89 (m, 2H, H<sub>arom</sub>). <sup>13</sup>C{<sup>1</sup>H} NMR (100 MHz, CDCl<sub>3</sub>): δ 22.3, 127.8, 128.2, 129.0, 129.3, 129.7, 131.5, 132.9, 133.7, 134.1, 134.7, 137.0, 137.2, 137.5, 137.9, 139.7, 140.8, 151.4, 153.7, 204.2. <sup>31</sup>P{<sup>1</sup>H} NMR (162 MHz, C<sub>6</sub>D<sub>6</sub>): δ 32.1 (dt, J<sub>P-Rh</sub> = 94.2 Hz, J<sub>P-P</sub> = 34.3 Hz, PPh<sub>3</sub>), 49.6 (dd, J<sub>P-Rh</sub> = 145.0 Hz, J<sub>P-P</sub> = 34.3 Hz, PPh<sub>2</sub>). IR (KBr): 1924 cm<sup>-1</sup> (ν<sub>C=O</sub>). Anal. Calc. for C<sub>62</sub>H<sub>50</sub>OP<sub>3</sub>RhSi: C, 71.95; H, 4.87. Found: C, 71.64; H, 5.19.

#### Preparation of {(*o*-Ph<sub>2</sub>PC<sub>6</sub>H<sub>4</sub>)<sub>2</sub>(*p*-methoxyphenyl)Si}Rh(CO)(PPh<sub>3</sub>) (**3e**)

A 50-mL Schlenk tube was charged with {*o*-(Ph<sub>2</sub>P)C<sub>6</sub>H<sub>4</sub>}<sub>2</sub>Si(H)(*p*-methoxyphenyl) (44.0 mg, 0.0668 mmol), RhH(CO)(PPh<sub>3</sub>)<sub>3</sub> (**2**) (61.4 mg, 0.0668 mmol), and toluene (3 mL), and the reaction mixture was stirred at 80 °C for 5 h. The solvent was then removed under reduced pressure to give a pale orange solid. The residue was washed with hexane (1.5 mL × 3) and dried under vacuum to afford 55.1 mg of **3e** (0.0524 mmol) as an orange powder in 78% yield. <sup>1</sup>H NMR (400 MHz, C<sub>6</sub>D<sub>6</sub>): δ 3.36 (s, 3H, *p*-CH<sub>3</sub>OC<sub>6</sub>H<sub>4</sub>), 6.42–6.45 (m, 4H, H<sub>arom</sub>), 6.67–7.07 (m, 34H,



$H_{\text{arom}}$ ), 7.36–7.38 (m, 2H,  $H_{\text{arom}}$ ), 7.60–7.67 (m, 5H,  $H_{\text{arom}}$ ), 7.87–7.89 (m, 2H  $H_{\text{arom}}$ ).  $^{13}\text{C}\{^1\text{H}\}$  NMR (100 MHz,  $\text{CDCl}_3$ ):  $\delta$  55.4, 127.6, 128.0, 128.7, 129.1, 131.3, 132.7, 133.6, 134.6, 137.2, 138.1, 139.5, 140.6, 151.2, 153.6, 203.6.  $^{31}\text{P}\{^1\text{H}\}$  NMR (162 MHz,  $\text{C}_6\text{D}_6$ ):  $\delta$  32.0 (dt,  $J_{\text{P-Rh}} = 95.5$  Hz,  $J_{\text{P-P}} = 33.0$  Hz,  $\text{PPh}_3$ ), 49.5 (dd,  $J_{\text{P-Rh}} = 146.9$  Hz,  $J_{\text{P-P}} = 33.0$  Hz,  $\text{PPh}_2$ ). IR (KBr): 1924  $\text{cm}^{-1}$  ( $\nu_{\text{C=O}}$ ). Anal. Calc. for  $\text{C}_{62}\text{H}_{50}\text{O}_2\text{P}_3\text{RhSi}$ : C, 70.85; H, 4.80. Found: C, 70.45; H, 4.98.

#### Preparation of $\{(o\text{-Ph}_2\text{PC}_6\text{H}_4)_2(p\text{-dimethylaminophenyl})\text{Si}\}\text{Rh}(\text{CO})(\text{PPh}_3)$ (**3f**)

A 50-mL Schlenk tube was charged with  $\{o\text{-(Ph}_2\text{P)C}_6\text{H}_4\}_2\text{Si}(\text{H})(p\text{-dimethylaminophenyl})$  (36.1 mg, 0.0537 mmol),  $\text{RhH}(\text{CO})(\text{PPh}_3)_3$  (**2**) (49.3 mg, 0.0537 mmol), and toluene (3 mL), and the reaction mixture was stirred at 80 °C for 5 h. The solvent was then removed under reduced pressure to give a pale orange solid. The residue was washed with hexane (1.5 mL  $\times$  3) and dried under vacuum to afford 50.0 mg of **3f** (0.0470 mmol) as an orange powder in 87% yield.  $^1\text{H}$  NMR (400 MHz,  $\text{C}_6\text{D}_6$ ):  $\delta$  2.55 (s, 6H,  $p\text{-(CH}_3)_2\text{NC}_6\text{H}_4$ ), 6.41–6.44 (m, 4H,  $H_{\text{arom}}$ ), 6.65–7.12 (m, 34H,  $H_{\text{arom}}$ ), 7.36–7.38 (m, 2H,  $H_{\text{arom}}$ ), 7.63–7.61 (m, 2H  $H_{\text{arom}}$ ), 7.69–7.73 (m, 3H,  $H_{\text{arom}}$ ), 7.94–7.96 (m, 2H  $H_{\text{arom}}$ ).  $^{13}\text{C}\{^1\text{H}\}$  NMR (100 MHz,  $\text{CDCl}_3$ ):  $\delta$  40.4, 127.2, 127.5, 128.3, 128.6, 130.8, 132.3, 133.2, 134.3, 136.9, 137.4, 139.3, 140.4, 150.6, 153.6, 203.1.  $^{31}\text{P}\{^1\text{H}\}$  NMR (162 MHz,  $\text{C}_6\text{D}_6$ ):  $\delta$  32.2 (dt,  $J_{\text{P-Rh}} = 94.2$  Hz,  $J_{\text{P-P}} = 33.7$  Hz,  $\text{PPh}_3$ ), 49.8 (dd,  $J_{\text{P-Rh}} = 146.9$  Hz,  $J_{\text{P-P}} = 33.7$  Hz,  $\text{PPh}_2$ ). IR (KBr): 1925  $\text{cm}^{-1}$  ( $\nu_{\text{C=O}}$ ). Anal. Calc. for  $\text{C}_{63}\text{H}_{53}\text{NOP}_3\text{RhSi}$ : C, 71.12; H, 5.02; N, 1.32. Found: C, 71.35; H, 5.36; N, 1.11

#### Preparation of $\{(o\text{-Ph}_2\text{PC}_6\text{H}_4)_2(p\text{-fluorophenyl})\text{Si}\}\text{Rh}(\text{CO})(\text{PPh}_3)$ (**3g**)

A 50-mL Schlenk tube was charged with  $\{o\text{-(Ph}_2\text{P)C}_6\text{H}_4\}_2\text{Si}(\text{H})(p\text{-fluorophenyl})$  (43.3 mg, 0.0670 mmol),  $\text{RhH}(\text{CO})(\text{PPh}_3)_3$  (**2**) (61.5 mg, 0.0670 mmol), and toluene (3 mL), and the reaction mixture was stirred at 80 °C. After 5 h, the solvent was removed under reduced pressure to give a pale orange solid. The residue was washed with hexane (2 mL  $\times$  3) and dried under vacuum to afford 49.7 mg of **3g** (0.0478 mmol) as an orange powder in 71% yield.  $^1\text{H}$  NMR (400 MHz,  $\text{C}_6\text{D}_6$ ):  $\delta$  6.42–6.46 (m, 2H,  $H_{\text{arom}}$ ), 6.68–7.09 (m, 39H,  $H_{\text{arom}}$ ), 7.35–7.63 (m, 4H,  $H_{\text{arom}}$ ), 7.75–7.77 (m, 2H,  $H_{\text{arom}}$ ).  $^{13}\text{C}\{^1\text{H}\}$  NMR (100 MHz,  $\text{CDCl}_3$ ):  $\delta$  127.6, 128.1, 128.8, 129.0, 129.2, 131.4, 132.5, 132.7, 133.6, 133.9, 134.6, 137.1, 138.6, 139.3, 139.4, 140.5, 151.4, 153.4, 203.7.  $^{19}\text{F}\{^1\text{H}\}$  NMR (376 MHz,  $\text{CDCl}_3$ ):  $\delta$  -111.9 (s).  $^{31}\text{P}\{^1\text{H}\}$  NMR (162 MHz,  $\text{C}_6\text{D}_6$ ):  $\delta$  32.0 (dt,  $J_{\text{P-Rh}} = 95.5$  Hz,  $J_{\text{P-P}} = 34.3$  Hz,  $\text{PPh}_3$ ), 49.4 (dd,  $J_{\text{P-Rh}} = 145.0$  Hz,  $J_{\text{P-P}} = 34.3$  Hz,  $\text{PPh}_2$ ). IR (KBr): 1921  $\text{cm}^{-1}$  ( $\nu_{\text{C=O}}$ ). Anal. Calc. for  $\text{C}_{61}\text{H}_{47}\text{FOP}_3\text{RhSi}$ : C, 70.52; H, 4.56. Found: C, 70.23; H, 4.75.

#### Preparation of $\{(o\text{-Ph}_2\text{PC}_6\text{H}_4)_2(\text{Ph})\text{Si}\}\text{Ir}(\text{CO})(\text{PPh}_3)$ (**6a**)

A 50-mL Schlenk tube was charged with **1a** (97.6 mg, 0.138 mmol),  $\text{IrH}(\text{CO})(\text{PPh}_3)_3$  (**5**) (140 mg, 0.138 mmol), and toluene (6 mL), and the reaction mixture was stirred at 110 °C. After 60 h, the solvent was removed under reduced pressure to give a pale orange solid. The residue was washed with hexane (2 mL  $\times$  3) and dried under vacuum to afford 139 mg of **6a** (0.125 mmol) as an orange powder in 91% yield.  $^1\text{H}$  NMR (400 MHz,  $\text{C}_6\text{D}_6$ ):  $\delta$  6.41–6.45 (m, 4H,  $H_{\text{arom}}$ ), 6.67–7.05 (m, 30H,  $H_{\text{arom}}$ ), 7.29–7.73 (m, 12H,  $H_{\text{arom}}$ ), 7.90–7.92 (m, 2H,  $H_{\text{arom}}$ ).  $^{13}\text{C}\{^1\text{H}\}$  NMR (100 MHz,  $\text{CDCl}_3$ ):  $\delta$  127.3, 127.6, 128.0, 128.7, 129.1, 129.4, 131.3, 132.8, 133.7, 134.3, 134.8, 136.8, 137.6, 139.3, 140.4, 141.0, 143.0, 152.8, 190.1.  $^{29}\text{Si}\{^1\text{H}\}$  NMR (79 MHz,  $\text{CDCl}_3$ ):  $\delta$  47.5 (dt,  $J_{\text{Si-P}} = 97.5$  Hz,

$J_{\text{Si-P}} = 10.5$  Hz).  $^{31}\text{P}\{^1\text{H}\}$  NMR (162 MHz,  $\text{C}_6\text{D}_6$ ):  $\delta$  2.6 (t,  $J_{\text{P-P}} = 25.7$  Hz,  $\text{PPh}_3$ ), 25.5 (d,  $J_{\text{P-P}} = 25.7$  Hz,  $\text{PPh}_2$ ). IR (KBr):  $1925\text{ cm}^{-1}$  ( $\nu_{\text{C=O}}$ ). Anal. Calc. for  $\text{C}_{61}\text{H}_{48}\text{IrOP}_3\text{Si}$ : C, 65.99; H, 4.36. Found: C, 66.32; H, 4.74.

#### Preparation of $\{(o\text{-Ph}_2\text{PC}_6\text{H}_4)_2(\text{Me})\text{Si}\}\text{Ir}(\text{CO})(\text{PPh}_3)$ (**6b**)

A 50-mL Schlenk tube was charged with **1b** (64.7 mg, 0.111 mmol),  $\text{IrH}(\text{CO})(\text{PPh}_3)_3$  (**5**) (112 mg, 0.111 mmol), and toluene (10 mL), and the reaction mixture was stirred at  $80^\circ\text{C}$ . After 14 h, the solvent was removed under reduced pressure to give a pale orange solid. The residue was washed with hexane (2 mL  $\times$  3) and dried under vacuum to afford 94.5 mg of **6b** (0.0902 mmol) as an orange powder in 81% yield. **6b-A**:  $^1\text{H}$  NMR (400 MHz,  $\text{C}_6\text{D}_6$ ):  $\delta$  1.52 (s, 3H,  $\text{SiCH}_3$ ), 6.32–7.71 (m, 41H,  $H_{\text{arom}}$ ), 7.91–7.93 (m, 2H,  $H_{\text{arom}}$ ).  $^{13}\text{C}\{^1\text{H}\}$  NMR (100 MHz,  $\text{CDCl}_3$ ):  $\delta$  2.3, 127.5, 127.8, 128.8, 130.8, 131.5, 132.5, 133.6, 134.7, 136.9, 139.4, 140.0, 145.7, 150.6, 153.7, 191.4.  $^{31}\text{P}\{^1\text{H}\}$  NMR (162 MHz,  $\text{C}_6\text{D}_6$ ):  $\delta$  3.0 (t,  $J_{\text{P-P}} = 25.7$  Hz,  $\text{PPh}_3$ ), 25.2 (d,  $J_{\text{P-P}} = 25.7$  Hz,  $\text{PPh}_2$ ). IR (KBr):  $1918\text{ cm}^{-1}$  ( $\nu_{\text{C=O}}$ ). **6b-B**:  $^1\text{H}$  NMR (400 MHz,  $\text{C}_6\text{D}_6$ ):  $\delta$  0.41 (s, 3H,  $\text{SiCH}_3$ ), 6.32–7.71 (m, 41H,  $H_{\text{arom}}$ ), 7.97–7.99 (m, 2H,  $H_{\text{arom}}$ ).  $^{31}\text{P}\{^1\text{H}\}$  NMR (162 MHz,  $\text{C}_6\text{D}_6$ ):  $\delta$  9.9 (t,  $J_{\text{P-P}} = 100.3$  Hz,  $\text{PPh}_3$ ), 36.5 (d,  $J_{\text{P-P}} = 100.3$  Hz,  $\text{PPh}_2$ ). IR (KBr):  $1959\text{ cm}^{-1}$  ( $\nu_{\text{C=O}}$ ). Anal. Calc. for  $\text{C}_{56}\text{H}_{46}\text{IrOP}_3\text{Si}$ : C, 64.17; H, 4.42. Found: C, 64.43; H, 4.82.

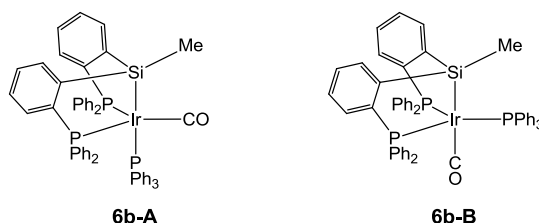

#### Preparation of $\{(o\text{-Ph}_2\text{PC}_6\text{H}_4)_2(\text{Et})\text{Si}\}\text{Ir}(\text{CO})(\text{PPh}_3)$ (**6c**)

A 50-mL Schlenk tube was charged with **1c** (177 mg, 0.291 mmol),  $\text{IrH}(\text{CO})(\text{PPh}_3)_3$  (**5**) (293 mg, 0.291 mmol), and toluene (7 mL), and the reaction mixture was stirred at  $100^\circ\text{C}$ . After 36 h, the solvent was removed under reduced pressure to give a pale orange solid. The residue was washed with hexane (3 mL  $\times$  3) and dried under vacuum to afford 294 mg of **6c** (0.277 mmol) as an orange powder in 95% yield.  $^1\text{H}$  NMR (400 MHz,  $\text{C}_6\text{D}_6$ ):  $\delta$  1.57 (t,  $J_{\text{H-H}} = 7.8$  Hz, 3H,  $\text{SiCH}_2\text{CH}_3$ ), 2.11 (q,  $J_{\text{H-H}} = 7.8$  Hz, 2H,  $\text{SiCH}_2\text{CH}_3$ ), 6.54–6.58 (m, 4H,  $H_{\text{arom}}$ ), 6.65–7.10 (m, 33H,  $H_{\text{arom}}$ ), 7.28–7.60 (m, 4H,  $H_{\text{arom}}$ ), 8.00–8.02 (m, 2H,  $H_{\text{arom}}$ ).  $^{13}\text{C}\{^1\text{H}\}$  NMR (100 MHz,  $\text{CDCl}_3$ ):  $\delta$  10.0, 11.5, 127.5, 128.1, 128.3, 129.0, 129.3, 131.4, 132.6, 133.4, 134.8, 136.5, 139.6, 140.8, 151.3, 153.6, 191.2.  $^{29}\text{Si}\{^1\text{H}\}$  NMR (79 MHz,  $\text{CDCl}_3$ ):  $\delta$  50.0 (dt,  $J_{\text{Si-P}} = 94.6$  Hz,  $J_{\text{Si-P}} = 9.8$  Hz).  $^{31}\text{P}\{^1\text{H}\}$  NMR (162 MHz,  $\text{C}_6\text{D}_6$ ):  $\delta$  1.2 (t,  $J_{\text{P-P}} = 25.7$  Hz,  $\text{PPh}_3$ ), 25.5 (d,  $J_{\text{P-P}} = 25.7$  Hz,  $\text{PPh}_2$ ). IR (KBr):  $1918\text{ cm}^{-1}$  ( $\nu_{\text{C=O}}$ ). Anal. Calc. for  $\text{C}_{57}\text{H}_{48}\text{IrOP}_3\text{Si}$ : C, 64.45; H, 4.55. Found: C, 64.61; H, 4.86.

### Selectivity determined from the reactions of **2** with $\{o\text{-(Ph}_2\text{P)C}_6\text{H}_4\}_2\text{Si(Me)(R)}$

**Reaction of 2 with  $\{o\text{-(Ph}_2\text{P)C}_6\text{H}_4\}_2\text{Si(Ph)(H)}$ .** An NMR tube was charged with  $\{o\text{-(Ph}_2\text{P)C}_6\text{H}_4\}_2\text{Si(Ph)(H)}$  (5.7 mg, 0.0091 mmol), **2** (8.4 mg, 0.0091 mmol), toluene- $d_8$  (0.50 mL), and trimesitylphosphine (7.1 mg) as an internal standard. Reaction was performed at 60 °C for 1 h to afford **3a** quantitatively (within the detection of  $^{31}\text{P}$  NMR spectroscopy).

**Reaction of 2 with  $\{o\text{-(Ph}_2\text{P)C}_6\text{H}_4\}_2\text{Si(Me)(H)}$  (**4a**).** An NMR tube was charged with **4a** (5.8 mg, 0.0103 mmol), **2** (9.4 mg, 0.0103 mmol), mesitylene- $d_{12}$  (0.50 mL), and trimesitylphosphine (8.0 mg) as an internal standard. Reaction was performed at 60 °C for 1 h to afford **3b** quantitatively (within the detection of  $^{31}\text{P}$  NMR spectroscopy).

**Reaction of 2 with  $\{o\text{-(Ph}_2\text{P)C}_6\text{H}_4\}_2\text{Si(Me)(Ph)}$  (**4b**).** An NMR tube was charged with **4b** (10.0 mg, 0.0156 mmol), **2** (14.3 mg, 0.0156 mmol), mesitylene- $d_{12}$  (0.50 mL), and trimesitylphosphine (12 mg) as an internal standard. Reaction was performed at 60 °C for 2 h to afford a 61:39 mixture of **3b** and **3a**. The experiment was repeated three times, and it was confirmed that the error of the yields was within 1%.

**Reaction of 2 with  $\{o\text{-(Ph}_2\text{P)C}_6\text{H}_4\}_2\text{Si(Me)(Et)}$  (**4c**).** An NMR tube was charged with **4c** (9.3 mg, 0.0156 mmol), **2** (14.3 mg, 0.0156 mmol), mesitylene- $d_{12}$  (0.50 mL), and trimesitylphosphine (12 mg) as an internal standard. Reaction was performed at 60 °C for 1 h to afford a 11:89 mixture of **3b** and **3c**. The experiment was repeated three times, and it was confirmed that the error of the yields was within 1%.

**Reaction of 2 with  $\{o\text{-(Ph}_2\text{P)C}_6\text{H}_4\}_2\text{Si(Me)(p-tolyl)}$  (**4d**).** An NMR tube was charged with **4d** (10.2 mg, 0.0156 mmol), **2** (14.3 mg, 0.0156 mmol), mesitylene- $d_{12}$  (0.50 mL), and trimesitylphosphine (12 mg) as an internal standard. Reaction was performed at 60 °C for 2 h to afford a 56:44 mixture of **3b** and **3d**. The experiment was repeated three times, and it was confirmed that the error of the yields was within 1%.

**Reaction of 2 with  $\{o\text{-(Ph}_2\text{P)C}_6\text{H}_4\}_2\text{Si(Me)(p-methoxyphenyl)}$  (**4e**).** An NMR tube was charged with **4e** (10.5 mg, 0.0156 mmol), **2** (14.3 mg, 0.0156 mmol), mesitylene- $d_{12}$  (0.50 mL), and trimesitylphosphine (12.1 mg) as an internal standard. Reaction was performed at 60 °C for 2 h to afford a 50:50 mixture of **3b** and **3e**. The experiment was repeated three times, and it was confirmed that the error of the yields was within 1%.

**Reaction of 2 with  $\{o\text{-(Ph}_2\text{P)C}_6\text{H}_4\}_2\text{Si(Me)(p-dimethylaminophenyl)}$  (**4f**).** An NMR tube was charged with **4f** (10.7 mg, 0.0156 mmol), **2** (14.3 mg, 0.0156 mmol), mesitylene- $d_{12}$  (0.50 mL), and trimesitylphosphine (12.1 mg) as an internal standard. Reaction was performed at 60 °C for 2 h to afford a 38:62 mixture of **3b** and **3f**. The experiment was repeated three times, and it was confirmed that the error of the yields was within 1%.

**Reaction of 2 with  $\{o\text{-(Ph}_2\text{P)C}_6\text{H}_4\}_2\text{Si(Me)(p-fluorophenyl)}$  (**4g**).** An NMR tube was charged with **4g** (10.3 mg, 0.0156 mmol), **2** (14.3 mg, 0.0156 mmol), mesitylene- $d_{12}$  (0.50 mL), and trimesitylphosphine (12 mg) as an internal standard. Reaction was performed at 60 °C for 2 h to afford a 66:34 mixture of **3b** and **3g**. The experiment was repeated three times, and it was confirmed that the error of the yields was within 2%.

### Selectivity data determined from the reactions of RhH(CO)(PPh<sub>3</sub>)<sub>3</sub> (**2**) with **4b**

A 50-mL Schlenk tube was charged with **4b** (60.0 mg, 0.0934 mmol), RhH(CO)(PPh<sub>3</sub>)<sub>3</sub> (**2**) (85.8 mg, 0.0934 mmol), mesitylene-*d*<sub>12</sub> (3.0 mL), and trimesitylphosphine (72.6 mg) as an internal standard. The solution was divided up evenly into six NMR sample tubes. The reactions were performed under appropriate conditions (see below). The experiment was repeated three times, and it was confirmed that the error of the yields was within 2%.

**Table S1** Selectivity data determined from the reactions of **2** with **4b**

| entry | conditions     | Yield <sup>a</sup> of Si-Ph | Yield <sup>a</sup> of Si-Me |
|-------|----------------|-----------------------------|-----------------------------|
|       |                | activation product          | activation product          |
| 1     | 40 °C, 12 h    | 72(2)% ( <b>3b</b> )        | 28(2)% ( <b>3a</b> )        |
| 2     | 60 °C, 2 h     | 61(1)% ( <b>3b</b> )        | 39(1)% ( <b>3a</b> )        |
| 3     | 80 °C, 30 min  | 54(1)% ( <b>3b</b> )        | 46(1)% ( <b>3a</b> )        |
| 4     | 100 °C, 10 min | 50(1)% ( <b>3b</b> )        | 50(1)% ( <b>3a</b> )        |
| 5     | 130 °C, 5 min  | 46(2)% ( <b>3b</b> )        | 54(2)% ( <b>3a</b> )        |
| 6     | 160 °C, 5 min  | 41(1)% ( <b>3b</b> )        | 59(1)% ( <b>3a</b> )        |

<sup>a</sup>Determined by <sup>31</sup>P NMR spectroscopy.

### Selectivity data determined from the reactions of IrH(CO)(PPh<sub>3</sub>)<sub>3</sub> (**5**) with **4b**

A 50-mL Schlenk tube was charged with **4b** (50.0 mg, 0.0778 mmol), IrH(CO)(PPh<sub>3</sub>)<sub>3</sub> (**5**) (78.4 mg, 0.0778 mmol), mesitylene-*d*<sub>12</sub> (2.5 mL), and trimesitylphosphine (60.4 mg) as an internal standard. The solution was divided up evenly into five NMR sample tubes. The reactions were performed under appropriate conditions (see below). The experiment was repeated three times, and it was confirmed that the error of the yields was within 2%.

**Table S2** Selectivity data determined from the reactions of **5** with **4b**

| entry | conditions  | Yield <sup>a</sup> of Si-Ph | Yield <sup>a</sup> of Si-Me |
|-------|-------------|-----------------------------|-----------------------------|
|       |             | activation product          | activation product          |
| 1     | 60 °C, 48 h | 44(1)% ( <b>6b</b> )        | 56(1)% ( <b>6a</b> )        |
| 2     | 80 °C, 24 h | 37(2)% ( <b>6b</b> )        | 63(2)% ( <b>6a</b> )        |
| 3     | 100 °C, 6 h | 32(1)% ( <b>6b</b> )        | 68(1)% ( <b>6a</b> )        |
| 4     | 130 °C, 1 h | 27(1)% ( <b>6b</b> )        | 73(1)% ( <b>6a</b> )        |
| 5     | 160 °C, 1 h | 22(1)% ( <b>6b</b> )        | 78(1)% ( <b>6a</b> )        |

<sup>a</sup>Determined by <sup>31</sup>P NMR spectroscopy.

### Selectivity data determined from the reactions of RhH(CO)(PPh<sub>3</sub>)<sub>3</sub> (**2**) with **4c**

A 50-mL Schlenk tube was charged with **4c** (37.0 mg, 0.0622 mmol), RhH(CO)(PPh<sub>3</sub>)<sub>3</sub> (**2**) (57.2 mg, 0.0622 mmol), mesitylene-*d*<sub>12</sub> (2.0 mL), and trimesitylphosphine (48.4 mg) as an internal standard. The solution was divided up evenly into four NMR sample tubes. The reactions were performed under appropriate conditions (see below). The experiment was repeated three times, and it was confirmed that the error of the yields was within 1%.

**Table S3** Selectivity data determined from the reactions of **2** with **4c**

| entry | conditions    | Yield <sup>a</sup> of Si–Et | Yield <sup>a</sup> of Si–Me |
|-------|---------------|-----------------------------|-----------------------------|
|       |               | activation product          | activation product          |
| 1     | 40 °C, 10 h   | 11(1)% ( <b>3b</b> )        | 89(1)% ( <b>3c</b> )        |
| 2     | 60 °C, 1 h    | 11(1)% ( <b>3b</b> )        | 89(1)% ( <b>3c</b> )        |
| 3     | 80 °C, 30 min | 12(1)% ( <b>3b</b> )        | 88(1)% ( <b>3c</b> )        |
| 4     | 160 °C, 5 min | 13(1)% ( <b>3b</b> )        | 87(1)% ( <b>3c</b> )        |

<sup>a</sup>Determined by <sup>31</sup>P NMR spectroscopy.

**Eyring plot for the reaction of 2 with 1a.** A Schlenk tube was charged with **2** (24.0 mg, 0.0261 mmol), **1a** (92.1 mg, 0.131 mmol), toluene-*d*<sub>8</sub> (1.6 mL), and trimesitylphosphine (30.4 mg) as an internal standard. The solution was divided up evenly into four NMR sample tubes and the reactions were performed under appropriate temperature (50, 60, 70, and 80 °C). The reactions were monitored by <sup>31</sup>P NMR spectroscopy. The rate constants were calculated on the basis of the time conversion of [**2**]:  $k = 1.61 \times 10^{-4}$  (50 °C);  $3.76 \times 10^{-4}$  (60 °C);  $9.82 \times 10^{-4}$  (70 °C);  $1.90 \times 10^{-3}$  (80 °C) (Table S4). The temperature dependence of the rate constants yielded the following activation parameters (Eyring plot was shown in Figure S1):  $\Delta H^\ddagger = 18.3 \pm 0.7$  kcal mol<sup>-1</sup> and  $\Delta S^\ddagger = -19.3 \pm 2.1$  cal mol<sup>-1</sup>K<sup>-1</sup>.

**Table S4**  $k$  at various temperature

| temp. (°C) | $k$ (s <sup>-1</sup> ) |
|------------|------------------------|
| 50         | $1.61 \times 10^{-4}$  |
| 60         | $3.76 \times 10^{-4}$  |
| 70         | $9.82 \times 10^{-4}$  |
| 80         | $1.90 \times 10^{-3}$  |

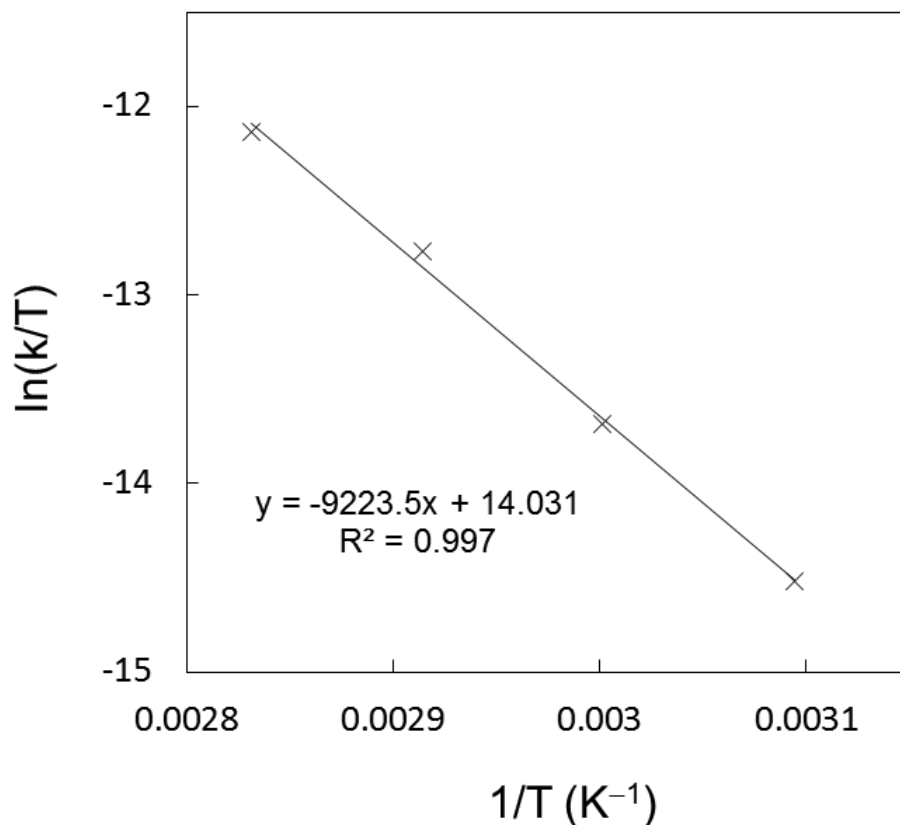

**Figure S1** Eyring plot



**Eyring plot for the reaction of 2 with 1b.** A Schlenk tube was charged with **1b** (75.8 mg, 0.131 mmol), toluene- $d_8$  (1.6 mL), and trimesitylphosphine (30.4 mg) as an internal standard. The solution was divided up evenly into four NMR sample tubes. After the sample was evacuated at  $-78$  °C, **2** (6.0 mg, 0.00653 mmol) was introduced into each tube. The reactions were performed at appropriate temperature (0, 10, 20, and 30 °C). The reactions were monitored by  $^{31}\text{P}$  NMR spectroscopy. The rate constants were calculated on the basis of the time conversion of [**2**]:  $k = 7.18 \times 10^{-5}$  (0 °C);  $2.30 \times 10^{-4}$  (10 °C);  $7.05 \times 10^{-4}$  (20 °C);  $2.55 \times 10^{-3}$  (30 °C) (Table S5). The temperature dependence of the rate constants yielded the following activation parameters (Eyring plot was shown in Figure S2):  $\Delta H^\ddagger = 18.8 \pm 0.8$  kcal mol $^{-1}$  and  $\Delta S^\ddagger = -8.5 \pm 2.8$  cal mol $^{-1}\text{K}^{-1}$ .

**Table S5**  $k$  at various temperature

| temp. (°C) | $k$ (s $^{-1}$ )      |
|------------|-----------------------|
| 0          | $7.18 \times 10^{-5}$ |
| 10         | $2.30 \times 10^{-4}$ |
| 20         | $7.05 \times 10^{-4}$ |
| 30         | $2.55 \times 10^{-3}$ |

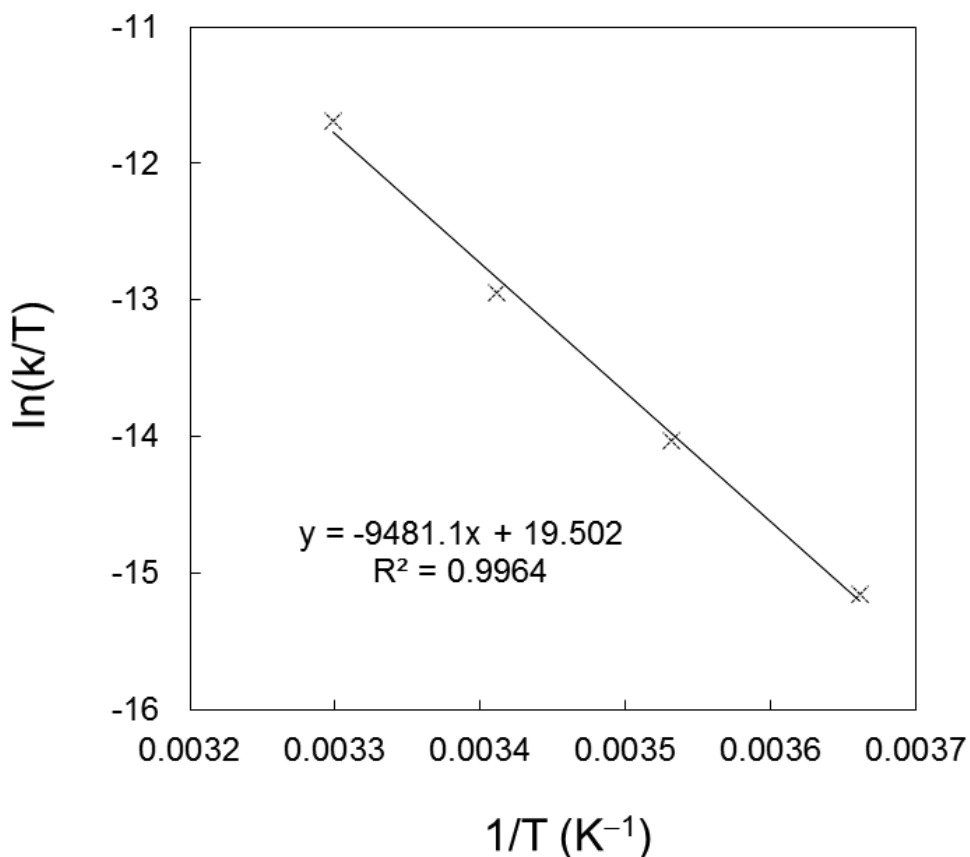

**Figure S2** Eyring plot

### DFT calculation for the Si-C<sub>Me</sub> activation by Rh(H)(CO)(PPh<sub>3</sub>)<sub>3</sub> (2).

To get more insight into the mechanistic information on the Si-C(sp<sup>3</sup>) activation by Rh(H)(CO)(PPh<sub>3</sub>)<sub>3</sub> (2), we performed density functional theory (DFT) calculations using model compounds {*o*-(H<sub>2</sub>P)-(C<sub>6</sub>H<sub>4</sub>)<sub>2</sub>Si(Me)<sub>2</sub>Rh(H)(CO) (1A), where the phenyl groups were replaced by hydrogens (Scheme S1). The calculations were carried out at B3PW91<sup>1</sup> level in conjunction with the Stuttgart/Dresden ECP<sup>2</sup> and associated with triple- $\zeta$  SDD basis sets for Rh. For C, H, O, P, and Si, 6-311G(d,p) basis sets were employed. All calculations were performed by utilizing the Gaussian09 program.<sup>3</sup> Frequency calculations at the same level were performed on optimized structures to ensure that minima exhibit only positive frequency and that transition states exhibit only one imaginary frequency. The intrinsic reaction coordinate (IRC) calculations<sup>4</sup> were also performed to unambiguously connect the transition states with the reactants and the products. The molecular structures were drawn by using the *GaussView version 4.1.2* program.<sup>5</sup> Cartesian Coordinates were shown in Table S18-S24.

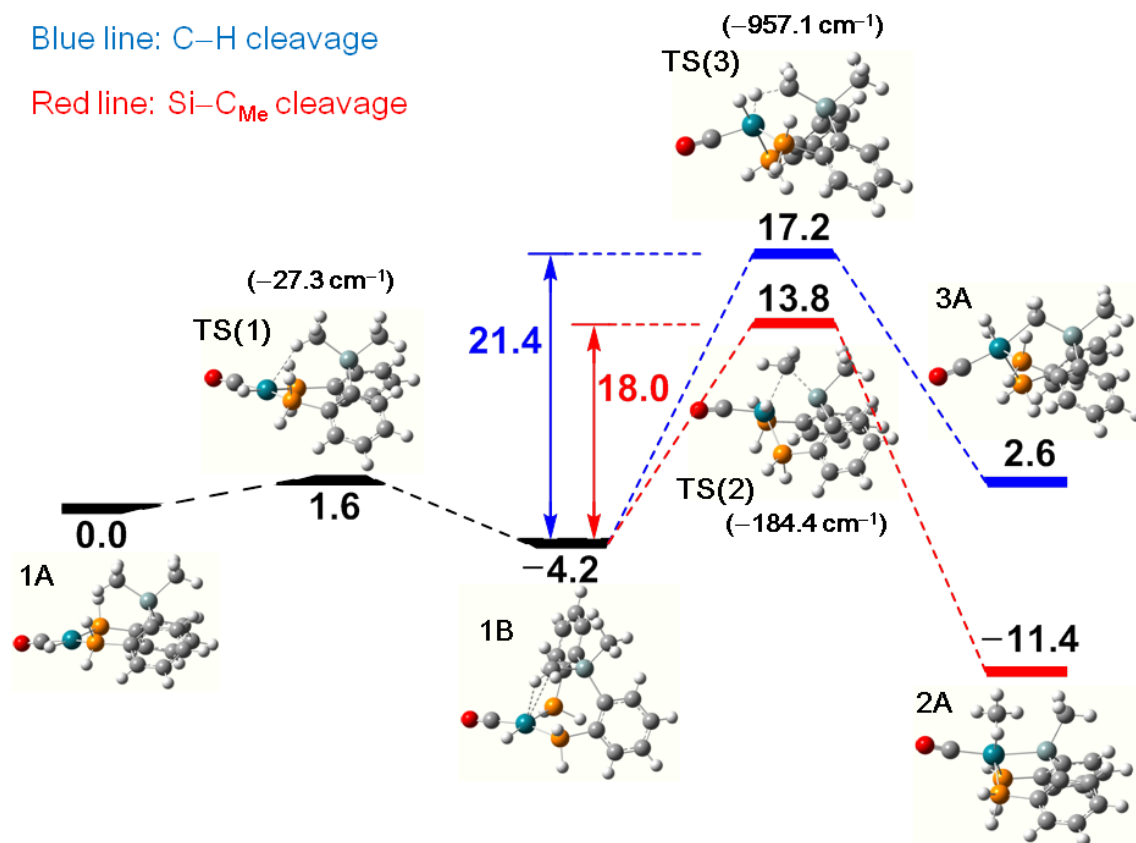

**Scheme S1** Computed reaction profiles for the oxidative addition of C-H (in blue) and Si-C<sub>Me</sub> (in red) bonds. Relative energies (at 298.15 K) are given in kcal/mol.

Once 16 electron complex **1A** featuring a square planar geometry was formed, the kinetic barrier to the  $\sigma$ C-H complex **1B** is highly accessible ( $\Delta G_{298}^{\ddagger} = 1.6$  kcal/mol). Not only C-H but also Si-C<sub>Me</sub> activation reactions potentially occur via the  $\sigma$ C-H complex **1B**. The transition state for Si-C<sub>Me</sub> cleavage TS(2) is lower in energy than the corresponding one for C-H cleavage TS(3) by 3.4 kcal/mol, strongly supporting that the Si-C<sub>Me</sub> cleavage is accessible without the C-H cleavage.

- 1 (a) A. D. Becke, *Phys. Rev.*, 1988, **A38**, 3098; (b) A. D. Becke, *J. Chem. Phys.*, 1993, **98**, 5648; (c) J. P. Perdew, Y. Wang, *Phys. Rev.*, 1992, **B45**, 13244.
- 2 D. Andrae, U. Haussermann, M. Dolg, H. Stoll, H. Preuss, *Theor. Chim. Acta*, 1990, **77**, 123.
- 3 Gaussian 09, Revision **A.02**, M. J. Frisch, G. W. Trucks, H. B. Schlegel, G. E. Scuseria, M. A. Robb, J. R. Cheeseman, G. Scalmani, V. Barone, B. Mennucci, G. A. Petersson, H. Nakatsuji, M. Caricato, X. Li, H. P. Hratchian, A. F. Izmaylov, J. Bloino, G. Zheng, J. L. Sonnenberg, M. Hada, M. Ehara, K. Toyota, R. Fukuda, J. Hasegawa, M. Ishida, T. Nakajima, Y. Honda, O. Kitao, H. Nakai, T. Vreven, Jr., J. A. Montgomery, J. E. Peralta, F. Ogliaro, M. Bearpark, J. J. Heyd, E. Brothers, K. N. Kudin, V. N. Staroverov, R. Kobayashi, J. Normand, K. Raghavachari, A. Rendell, J. C. Burant, S. S. Iyengar, J. Tomasi, M. Cossi, N. Rega, N. J. Millam, M. Klene, J. E. Knox, J. B. Cross, V. Bakken, C. Adamo, J. Jaramillo, R. Gomperts, R. E. Stratmann, O. Yazyev, A. J. Austin, R. Cammi, C. Pomelli, J. W. Ochterski, R. L. Martin, K. Morokuma, V. G. Zakrzewski, G. A. Voth, P. Salvador, J. J. Dannenberg, S. Dapprich, A. D. Daniels, Ö. Farkas, J. B. Foresman, J. V. Ortiz, J. Cioslowski, D. J. Fox, Gaussian, Inc., Wallingford CT, 2009.
- 4 C. Gonzalez, H. B. Schlegel, *J. Chem. Phys.*, 1989, **90**, 2154.
- 5 R. II. Dennington, T. Keith, J. Millam, *GaussView*, Version 4.1, Semichem, Inc., Shawnee Mission, KS, 2007.

Result of X-ray diffraction study of **3a**

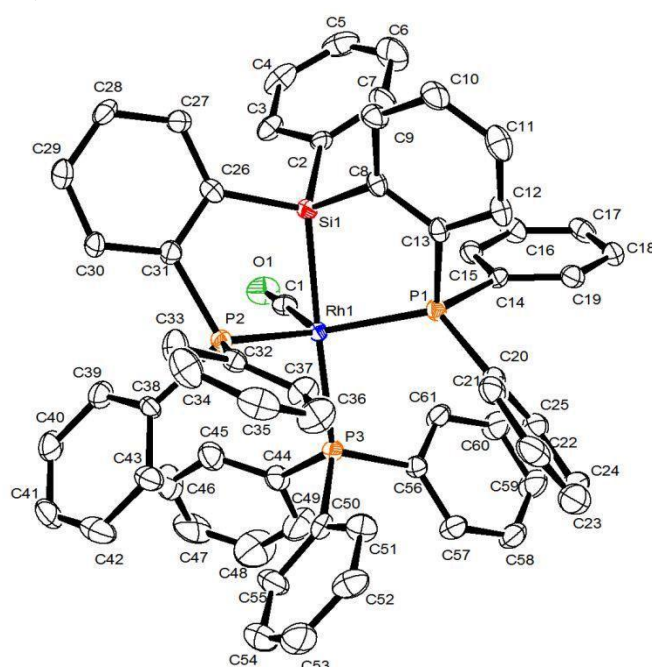

**Figure S3.** Molecular structure of **3a** (40% probability).

**Table S6.** Crystallographic data for **3a**.

| (a) Crystal data                          |                                                      | (b) Intensity measurements                   |                                                  |
|-------------------------------------------|------------------------------------------------------|----------------------------------------------|--------------------------------------------------|
| Empirical formula                         | C <sub>61</sub> H <sub>48</sub> OP <sub>3</sub> RhSi | Diffractometer                               | Rigaku/MSC Mercury CCD                           |
| Formula weight                            | 1021.95                                              | Radiation                                    | MoK $\alpha$ ( $\lambda = 0.71069 \text{ \AA}$ ) |
| Crystal description                       | Prism                                                | Monochromator                                | Graphite                                         |
| Crystal color                             | Pale Yellow                                          | 2 $\theta$ max (°)                           | 55                                               |
| Crystal size (mm)                         | 0.25 × 0.05 × 0.03                                   | Reflections collected                        | 37223                                            |
| Crystalizing solution                     | Et <sub>2</sub> O (23 °C)                            | Independent reflections                      | 11027 ( $R_{\text{int}} = 0.063$ )               |
| Crystal system                            | Monoclinic                                           | Reflections observed (> 2 $\sigma$ )         | 7400                                             |
| Space group                               | $P2_1/c$ (#14)                                       | Abs. correction type                         | Multi-scan                                       |
| $a$ (Å)                                   | 11.1258(7)                                           | Abs. transmission                            | 0.705 (min.), 0.985 (max.)                       |
| $b$ (Å)                                   | 16.2240(10)                                          | <b>(c) Refinement (CrystalStructure 3.8)</b> |                                                  |
| $c$ (Å)                                   | 27.441(2)                                            | $R_1$ ( $I > 2\sigma(I)$ )                   | 0.0582                                           |
| $\beta$ (°)                               | 99.718(3)                                            | $wR_2$ ( $I > 2\sigma(I)$ )                  | 0.1771                                           |
| Volume (Å <sup>3</sup> )                  | 4882.2(6)                                            | Data                                         | 11027                                            |
| $Z$ value                                 | 4                                                    | Restraints                                   | 0                                                |
| $D_{\text{calc}}$ (g/cm <sup>3</sup> )    | 1.389                                                | Parameters                                   | 652                                              |
| Measurement temp. (K)                     | 200                                                  | Goodness of fit on $F^2$                     | 1.002                                            |
| $\mu$ (MoK $\alpha$ ) (mm <sup>-1</sup> ) | 0.515                                                | Largest diff. peak and hole                  | 1.73 and -1.05 e.Å <sup>-3</sup>                 |

**Table S7.** Selected bond lengths (Å) and angles (°).

|            |            |             |            |            |            |         |            |
|------------|------------|-------------|------------|------------|------------|---------|------------|
| Rh1-P1     | 2.3780(12) | Rh1-P2      | 2.3594(11) | Rh1-P3     | 2.3945(11) | Rh1-Si1 | 2.3531(11) |
| Rh1-C1     | 1.879(4)   | C1-O1       | 1.150(5)   | Si1-C2     | 1.885(4)   | Si1-C8  | 1.888(4)   |
| Si1-C26    | 1.886(4)   |             |            |            |            |         |            |
| P1-Rh1-P2  | 117.92(4)  | P1-Rh1-P3   | 99.00(4)   | P2-Rh1-P3  | 102.79(4)  |         |            |
| P1-Rh1-C1  | 125.41(14) | P2-Rh1-C1   | 111.31(14) | P3-Rh1-C1  | 91.60(14)  |         |            |
| P1-Rh1-Si1 | 80.10(4)   | P2-Rh1-Si1  | 80.65(4)   | P3-Rh1-Si1 | 176.40(4)  |         |            |
| C1-Rh1-Si1 | 86.13(14)  | Rh1-C1-O1   | 177.1(3)   | Rh1-Si1-C2 | 120.85(15) |         |            |
| Rh1-Si1-C8 | 108.67(14) | Rh1-Si1-C26 | 108.83(15) |            |            |         |            |

Result of X-ray diffraction study of **3b**

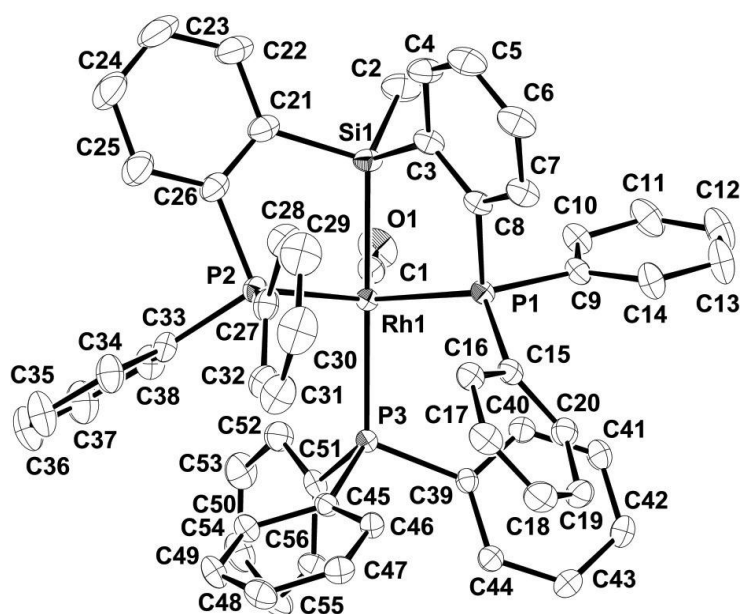

Figure S4. Molecular structure of **3b** (40% probability).

Table S8. Crystallographic data for **3b**.

| (a) Crystal data                          |                                                                                          | (b) Intensity measurements           |                                       |
|-------------------------------------------|------------------------------------------------------------------------------------------|--------------------------------------|---------------------------------------|
| Empirical formula                         | C <sub>56</sub> H <sub>46</sub> OP <sub>3</sub> RhSi·2(CH <sub>2</sub> Cl <sub>2</sub> ) | Diffractometer                       | Rigaku/MSC Mercury CCD                |
| Formula weight                            | 1128.69                                                                                  | Radiation                            | MoK $\alpha$ ( $\lambda = 0.71069$ Å) |
| Crystal description                       | Prism                                                                                    | Monochromator                        | Graphite                              |
| Crystal color                             | Pale Yellow                                                                              | 2 $\theta$ max (°)                   | 55                                    |
| Crystal size (mm)                         | 0.35 × 0.25 × 0.15                                                                       | Reflections collected                | 20790                                 |
| Crystalizing solution                     | CH <sub>2</sub> Cl <sub>2</sub> , <i>n</i> -hexane (23 °C)                               | Independent reflections              | 11765 ( $R_{\text{int}} = 0.0277$ )   |
| Crystal system                            | Triclinic                                                                                | Reflections observed (> 2 $\sigma$ ) | 10988                                 |
| Space group                               | <i>P</i> -1 (#2)                                                                         | Abs. correction type                 | Multi-scan                            |
| <i>a</i> (Å)                              | 12.0136(7)                                                                               | Abs. transmission                    | 0.7962 (min.), 0.9046 (max.)          |
| <i>b</i> (Å)                              | 12.8856(5)                                                                               | (c) Refinement (Shelxl-97)           |                                       |
| <i>c</i> (Å)                              | 17.6972(11)                                                                              | $R_1$ ( $I > 2\sigma(I)$ )           | 0.0428                                |
| $\alpha$ (°)                              | 94.380(3)                                                                                | $wR_2$ ( $I > 2\sigma(I)$ )          | 0.1037                                |
| $\beta$ (°)                               | 105.563(3)                                                                               | $R_1$ (all data)                     | 0.0471                                |
| $\gamma$ (°)                              | 90.173(2)                                                                                | $wR_2$ (all data)                    | 0.1062                                |
| Volume (Å <sup>3</sup> )                  | 2630.6(2)                                                                                | Data / Restraints / Parameters       | 11765 / 0 / 620                       |
| <i>Z</i> value                            | 2                                                                                        | Goodness of fit on $F^2$             | 1.075                                 |
| $D_{\text{calc}}$ (g/cm <sup>3</sup> )    | 1.425                                                                                    | Largest diff. peak and hole          | 0.893 and -0.928 e.Å <sup>-3</sup>    |
| Measurement temp. (K)                     | 200                                                                                      |                                      |                                       |
| $\mu$ (MoK $\alpha$ ) (mm <sup>-1</sup> ) | 0.682                                                                                    |                                      |                                       |

Table S9. Selected bond lengths (Å) and angles (°).

|            |            |             |            |            |            |         |           |
|------------|------------|-------------|------------|------------|------------|---------|-----------|
| Rh1-P1     | 2.3601(6)  | Rh1-P2      | 2.3591(6)  | Rh1-P3     | 2.3974(6)  | Rh1-Si1 | 2.3601(7) |
| Rh1-C1     | 1.869(3)   | C1-O1       | 1.150(5)   | Si1-C2     | 1.885(4)   | Si1-C8  | 1.888(4)  |
| Si1-C26    | 1.886(4)   |             |            |            |            |         |           |
| P1-Rh1-P2  | 108.65(2)  | P1-Rh1-P3   | 98.22(2)   | P2-Rh1-P3  | 99.53(2)   |         |           |
| P1-Rh1-C1  | 119.83(8)  | P2-Rh1-C1   | 125.71(8)  | P3-Rh1-C1  | 96.45(8)   |         |           |
| P1-Rh1-Si1 | 81.91(2)   | P2-Rh1-Si1  | 80.86(2)   | P3-Rh1-Si1 | 179.53(2)  |         |           |
| C1-Rh1-Si1 | 83.09(8)   | Rh1-C1-O1   | 177.1(3)   | Rh1-Si1-C2 | 120.85(15) |         |           |
| Rh1-Si1-C8 | 108.67(14) | Rh1-Si1-C26 | 108.83(15) |            |            |         |           |

Result of X-ray diffraction study of **3c**

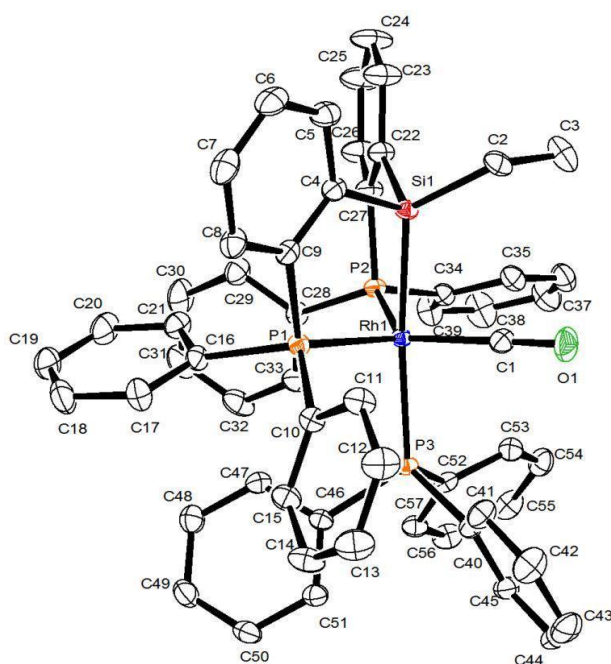

**Figure S5.** Molecular structure of **3c** (40% probability).

**Table S10.** Crystallographic data for **3c**.

| (a) Crystal data                          |                                                      | (b) Intensity measurements                   |                                       |
|-------------------------------------------|------------------------------------------------------|----------------------------------------------|---------------------------------------|
| Empirical formula                         | C <sub>57</sub> H <sub>48</sub> OP <sub>3</sub> RhSi | Diffractometer                               | Rigaku/MSC Mercury CCD                |
| Formula weight                            | 972.92                                               | Radiation                                    | MoK $\alpha$ ( $\lambda = 0.71069$ Å) |
| Crystal description                       | Prism                                                | Monochromator                                | Graphite                              |
| Crystal color                             | Yellow                                               | $2\theta$ max (°)                            | 55                                    |
| Crystal size (mm)                         | 0.20 × 0.15 × 0.15                                   | Reflections collected                        | 18534                                 |
| Crystalizing solution                     | Et <sub>2</sub> O, <i>n</i> -pentane (23 °C)         | Independent reflections                      | 10572 ( $R_{int} = 0.028$ )           |
| Crystal system                            | Triclinic                                            | Reflections observed ( $> 2\sigma$ )         | 9576                                  |
| Space group                               | <i>P</i> -1 (#2)                                     | Abs. correction type                         | Multi-scan                            |
| <i>a</i> (Å)                              | 12.272(3)                                            | Abs. transmission                            | 0.738 (min.), 0.924 (max.)            |
| <i>b</i> (Å)                              | 12.984(3)                                            | <b>(c) Refinement (CrystalStructure 3.8)</b> |                                       |
| <i>c</i> (Å)                              | 16.181(4)                                            | $R_1$ ( $I > 2\sigma(I)$ )                   | 0.0369                                |
| $\alpha$ (°)                              | 80.866(6)                                            | $wR_2$ ( $I > 2\sigma(I)$ )                  | 0.1118                                |
| $\beta$ (°)                               | 85.510(6)                                            | Data                                         | 10572                                 |
| $\gamma$ (°)                              | 68.890(5)                                            | Restraints                                   | 0                                     |
| Volume (Å <sup>3</sup> )                  | 2374.1(9)                                            | Parameters                                   | 616                                   |
| <i>Z</i> value                            | 2                                                    | Goodness of fit on $F^2$                     | 1.004                                 |
| $D_{calc}$ (g/cm <sup>3</sup> )           | 1.361                                                | Largest diff. peak and hole                  | 1.10 and -0.89 e.Å <sup>-3</sup>      |
| Measurement temp. (K)                     | 200                                                  |                                              |                                       |
| $\mu$ (MoK $\alpha$ ) (mm <sup>-1</sup> ) | 0.525                                                |                                              |                                       |

**Table S11.** Selected bond lengths (Å) and angles (°).

|            |             |             |            |            |             |         |           |
|------------|-------------|-------------|------------|------------|-------------|---------|-----------|
| Rh1-P1     | 2.3569(5)   | Rh1-P2      | 2.3625(5)  | Rh1-P3     | 2.3851(5)   | Rh1-Si1 | 2.3548(5) |
| Rh1-C1     | 1.8645(18)  | C1-O1       | 1.155(2)   | Si1-C2     | 1.891(2)    | Si1-C4  | 1.892(2)  |
| Si1-C22    | 1.902(2)    |             |            |            |             |         |           |
| P1-Rh1-P2  | 117.469(17) | P1-Rh1-P3   | 98.235(18) | P2-Rh1-P3  | 100.417(19) |         |           |
| P1-Rh1-C1  | 119.91(7)   | P2-Rh1-C1   | 119.15(8)  | P3-Rh1-C1  | 90.07(7)    |         |           |
| P1-Rh1-Si1 | 83.154(19)  | P2-Rh1-Si1  | 83.84(2)   | P3-Rh1-Si1 | 174.163(17) |         |           |
| C1-Rh1-Si1 | 84.34(7)    | Rh1-C1-O1   | 178.57(19) | Rh1-Si1-C2 | 121.59(7)   |         |           |
| Rh1-Si1-C4 | 109.49(7)   | Rh1-Si1-C22 | 108.86(7)  |            |             |         |           |



Result of X-ray diffraction study of **6a**

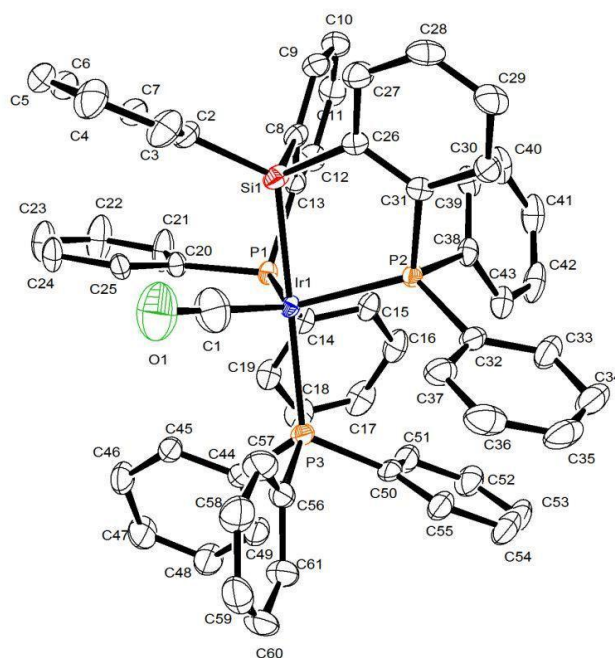

**Figure S6.** Molecular structure of **6a** (40% probability).

**Table S12.** Crystallographic data for **6a**.

| (a) Crystal data                          |                                                                             | (b) Intensity measurements            |                                                  |
|-------------------------------------------|-----------------------------------------------------------------------------|---------------------------------------|--------------------------------------------------|
| Empirical formula                         | C <sub>61</sub> H <sub>48</sub> IrOP <sub>3</sub> Si·1/2(Et <sub>2</sub> O) | Diffractometer                        | Rigaku/MSC Mercury CCD                           |
| Formula weight                            | 1131.80                                                                     | Radiation                             | MoK $\alpha$ ( $\lambda = 0.71069 \text{ \AA}$ ) |
| Crystal description                       | Prism                                                                       | Monochromator                         | Graphite                                         |
| Crystal color                             | Pale Yellow                                                                 | 2 $\theta$ max (°)                    | 55                                               |
| Crystal size (mm)                         | 0.20 × 0.08 × 0.08                                                          | Reflections collected                 | 40576                                            |
| Crystalizing solution                     | Et <sub>2</sub> O (23 °C)                                                   | Independent reflections               | 11649 ( $R_{\text{int}} = 0.049$ )               |
| Crystal system                            | Monoclinic                                                                  | Reflections observed (> 2 $\sigma$ )  | 9581                                             |
| Space group                               | $P2_1/n$ (#14)                                                              | Abs. correction type                  | Multi-scan                                       |
| $a$ (Å)                                   | 12.039(2)                                                                   | Abs. transmission                     | 0.606 (min.), 0.800 (max.)                       |
| $b$ (Å)                                   | 20.100(4)                                                                   | (c) Refinement (CrystalStructure 3.8) |                                                  |
| $c$ (Å)                                   | 21.779(5)                                                                   | $R_1$ ( $I > 2\sigma(I)$ )            | 0.0417                                           |
| $\beta$ (°)                               | 104.258(2)                                                                  | $wR_2$ ( $I > 2\sigma(I)$ )           | 0.0940                                           |
| Volume (Å <sup>3</sup> )                  | 5107.8(18)                                                                  | Data                                  | 11649                                            |
| $Z$ value                                 | 4                                                                           | Restraints                            | 0                                                |
| $D_{\text{calc}}$ (g/cm <sup>3</sup> )    | 1.472                                                                       | Parameters                            | 683                                              |
| Measurement temp. (K)                     | 200                                                                         | Goodness of fit on $F^2$              | 1.013                                            |
| $\mu$ (MoK $\alpha$ ) (mm <sup>-1</sup> ) | 2.782                                                                       | Largest diff. peak and hole           | 1.96 and -1.63 e.Å <sup>-3</sup>                 |

**Table S13.** Selected bond lengths (Å) and angles (°).

|            |            |             |            |            |            |         |            |
|------------|------------|-------------|------------|------------|------------|---------|------------|
| Ir1-P1     | 2.3253(9)  | Ir1-P2      | 2.3253(11) | Ir1-P3     | 2.3638(12) | Ir1-Si1 | 2.3857(14) |
| Ir1-C1     | 1.792(7)   | C1-O1       | 1.219(9)   | Si1-C2     | 1.879(5)   | Si1-C8  | 1.899(4)   |
| Si1-C26    | 1.896(4)   |             |            |            |            |         |            |
| P1-Ir1-P2  | 106.84(3)  | P1-Ir1-P3   | 102.46(4)  | P2-Ir1-P3  | 99.28(4)   |         |            |
| P1-Ir1-C1  | 117.9(2)   | P2-Ir1-C1   | 128.3(2)   | P3-Ir1-C1  | 95.1(2)    |         |            |
| P1-Ir1-Si1 | 81.40(4)   | P2-Ir1-Si1  | 80.48(4)   | P3-Ir1-Si1 | 175.98(4)  |         |            |
| C1-Ir1-Si1 | 82.0(2)    | Ir1-C1-O1   | 178.6(6)   | Ir1-Si1-C2 | 121.22(17) |         |            |
| Ir1-Si1-C8 | 106.93(16) | Ir1-Si1-C26 | 107.25(15) |            |            |         |            |

Result of X-ray diffraction study of **6b**

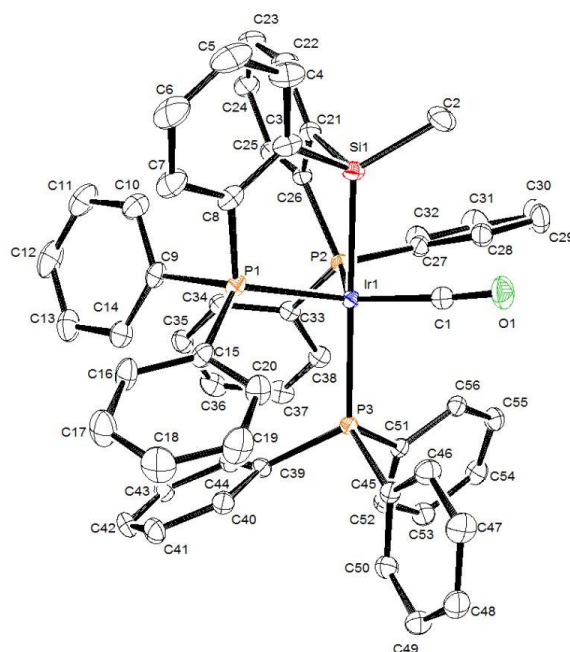

Figure S7. Molecular structure of **6b** (40% probability).

Table S14. Crystallographic data for **6b**.

| (a) Crystal data                          |                                                                                          | (b) Intensity measurements            |                                       |
|-------------------------------------------|------------------------------------------------------------------------------------------|---------------------------------------|---------------------------------------|
| Empirical formula                         | C <sub>56</sub> H <sub>46</sub> IrOP <sub>3</sub> Si·2(CH <sub>2</sub> Cl <sub>2</sub> ) | Diffractometer                        | Rigaku/MSC Mercury CCD                |
| Formula weight                            | 1218.07                                                                                  | Radiation                             | MoK $\alpha$ ( $\lambda = 0.71069$ Å) |
| Crystal description                       | Platelet                                                                                 | Monochromator                         | Graphite                              |
| Crystal color                             | Colorless                                                                                | 2 $\theta$ max (°)                    | 55                                    |
| Crystal size (mm)                         | 0.35 × 0.25 × 0.20                                                                       | Reflections collected                 | 20788                                 |
| Crystalizing solution                     | CH <sub>2</sub> Cl <sub>2</sub> , <i>n</i> -hexane (23 °C)                               | Independent reflections               | 11792 ( $R_{\text{int}} = 0.026$ )    |
| Crystal system                            | Triclinic                                                                                | Reflections observed (> 2 $\sigma$ )  | 11271                                 |
| Space group                               | <i>P</i> -1 (#2)                                                                         | Abs. correction type                  | Multi-scan                            |
| <i>a</i> (Å)                              | 12.020(2)                                                                                | Abs. transmission                     | 0.419 (min.), 0.559 (max.)            |
| <i>b</i> (Å)                              | 12.852(3)                                                                                | (c) Refinement (CrystalStructure 3.8) |                                       |
| <i>c</i> (Å)                              | 17.695(3)                                                                                | $R_1$ ( $I > 2\sigma(I)$ )            | 0.0315                                |
| $\alpha$ (°)                              | 85.644(4)                                                                                | $wR_2$ ( $I > 2\sigma(I)$ )           | 0.0930                                |
| $\beta$ (°)                               | 74.360(4)                                                                                | Data                                  | 11792                                 |
| $\gamma$ (°)                              | 90.106(5)                                                                                | Restraints                            | 0                                     |
| Volume (Å <sup>3</sup> )                  | 2623.8(9)                                                                                | Parameters                            | 663                                   |
| <i>Z</i> value                            | 2                                                                                        | Goodness of fit on $F^2$              | 1.013                                 |
| $D_{\text{calc}}$ (g/cm <sup>3</sup> )    | 1.542                                                                                    | Largest diff. peak and hole           | 2.35 and -1.24 e.Å <sup>-3</sup>      |
| Measurement temp. (K)                     | 200                                                                                      |                                       |                                       |
| $\mu$ (MoK $\alpha$ ) (mm <sup>-1</sup> ) | 2.909                                                                                    |                                       |                                       |

Table S15. Selected bond lengths (Å) and angles (°).

|            |            |             |            |            |            |         |           |
|------------|------------|-------------|------------|------------|------------|---------|-----------|
| Ir1-P1     | 2.3382(7)  | Ir1-P2      | 2.3370(6)  | Ir1-P3     | 2.3811(8)  | Ir1-Si1 | 2.3805(9) |
| Ir1-C1     | 1.857(2)   | C1-O1       | 1.165(3)   | Si1-C2     | 1.884(3)   | Si1-C3  | 1.893(3)  |
| Si1-C21    | 1.895(2)   |             |            |            |            |         |           |
| P1-Ir1-P2  | 108.57(2)  | P1-Ir1-P3   | 99.35(2)   | P2-Ir1-P3  | 98.06(2)   |         |           |
| P1-Ir1-C1  | 126.19(9)  | P2-Ir1-C1   | 120.08(9)  | P3-Ir1-C1  | 95.45(10)  |         |           |
| P1-Ir1-Si1 | 81.01(2)   | P2-Ir1-Si1  | 81.84(2)   | P3-Ir1-Si1 | 179.64(2)  |         |           |
| C1-Ir1-Si1 | 84.31(10)  | Ir1-C1-O1   | 175.2(2)   | Ir1-Si1-C2 | 122.01(13) |         |           |
| Ir1-Si1-C3 | 107.97(12) | Ir1-Si1-C21 | 106.70(11) |            |            |         |           |

Result of X-ray diffraction study of **6c**

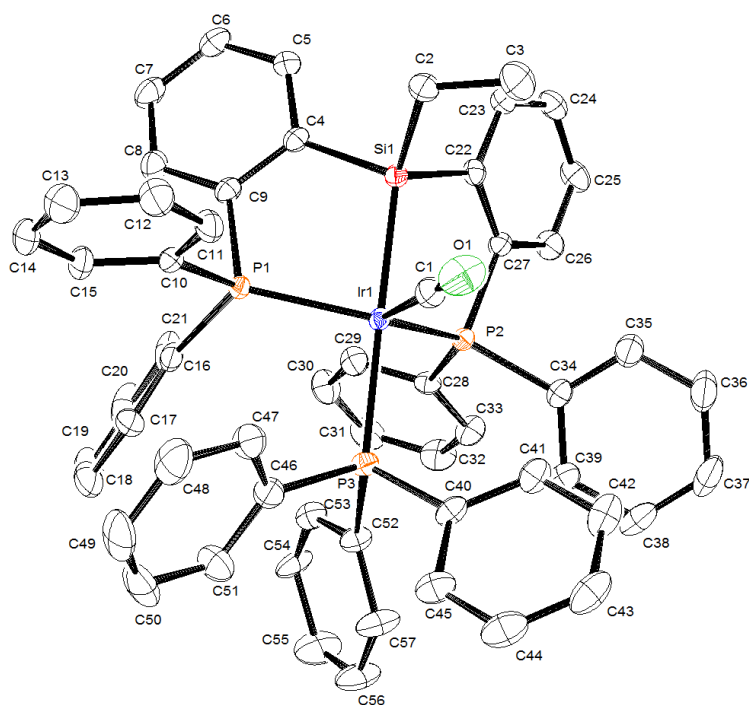

**Figure S8.** Molecular structure of **6c** (40% probability).

**Table S16.** Crystallographic data for **6c**.

| (a) Crystal data                          |                                                                                                           | (b) Intensity measurements           |                                       |
|-------------------------------------------|-----------------------------------------------------------------------------------------------------------|--------------------------------------|---------------------------------------|
| Empirical formula                         | C <sub>57</sub> H <sub>48</sub> IrO <sub>1</sub> P <sub>3</sub> Si, 0.5(C <sub>4</sub> H <sub>10</sub> O) | Diffractometer                       | Rigaku/MSM Mercury CCD                |
| Formula weight                            | 1099.21                                                                                                   | Radiation                            | MoK $\alpha$ ( $\lambda = 0.71069$ Å) |
| Crystal description                       | Platelet                                                                                                  | Monochromator                        | Graphite                              |
| Crystal color                             | Colorless                                                                                                 | $2\theta$ max (°)                    | 55                                    |
| Crystal size (mm)                         | 0.25 × 0.12 × 0.03                                                                                        | Reflections collected                | 38992                                 |
| Crystalizing solution                     | Et <sub>2</sub> O, <i>n</i> -pentane (23 °C)                                                              | Independent reflections              | 11200 ( $R_{\text{int}} = 0.0492$ )   |
| Crystal system                            | Monoclinic                                                                                                | Reflections observed ( $> 2\sigma$ ) | 10356                                 |
| Space group                               | $P2_1/n$ (#14)                                                                                            | Abs. correction type                 | Multi-scan                            |
| <i>a</i> (Å)                              | 12.104(3)                                                                                                 | Abs. transmission                    | 0.5331 (min.), 0.9186 (max.)          |
| <i>b</i> (Å)                              | 21.128(5)                                                                                                 | <b>(c) Refinement (Shelxl-97)</b>    |                                       |
| <i>c</i> (Å)                              | 19.248(5)                                                                                                 | $R_1$ ( $I > 2\sigma(I)$ )           | 0.0482                                |
| $\beta$ (°)                               | 91.887(3)                                                                                                 | $wR_2$ ( $I > 2\sigma(I)$ )          | 0.0904                                |
| Volume (Å <sup>3</sup> )                  | 4920(2)                                                                                                   | $R_1$ (all data)                     | 0.0555                                |
| Z value                                   | 4                                                                                                         | $wR_2$ (all data)                    | 0.0927                                |
| $D_{\text{calc}}$ (g/cm <sup>3</sup> )    | 1.484                                                                                                     | Data / Restraints / Parameters       | 11200 / 0 / 6212                      |
| Measurement temp. (K)                     | 200                                                                                                       | Goodness of fit on $F^2$             | 1.230                                 |
| $\mu$ (MoK $\alpha$ ) (mm <sup>-1</sup> ) | 2.878                                                                                                     | Largest diff. peak and hole          | 1.446 and - 1.203 e.Å <sup>-3</sup>   |

**Table S17.** Selected bond lengths (Å) and angles (°).

|            |            |             |            |            |            |         |            |
|------------|------------|-------------|------------|------------|------------|---------|------------|
| Ir1-P1     | 2.3327(11) | Ir1-P2      | 2.3273(11) | Ir1-P3     | 2.3793(11) | Ir1-Si1 | 2.3868(12) |
| Ir1-C1     | 1.871(5)   | C1-O1       | 1.146(6)   | Si1-C2     | 1.892(5)   | Si1-C4  | 1.897(4)   |
| Si1-C22    | 1.891(5)   |             |            |            |            |         |            |
| P1-Ir1-P2  | 119.10(4)  | P1-Ir1-P3   | 98.99(4)   | P2-Ir1-P3  | 98.02(4)   |         |            |
| P1-Ir1-C1  | 118.93(15) | P2-Ir1-C1   | 118.99(16) | P3-Ir1-C1  | 90.19(15)  |         |            |
| P1-Ir1-Si1 | 82.07(4)   | P2-Ir1-Si1  | 83.38(4)   | P3-Ir1-Si1 | 177.48(4)  |         |            |
| C1-Ir1-Si1 | 87.30(15)  | Ir1-C1-O1   | 178.6(5)   | Ir1-Si1-C2 | 122.22(16) |         |            |
| Ir1-Si1-C4 | 108.49(14) | Ir1-Si1-C22 | 108.39(14) |            |            |         |            |

**Figure S9.** NMR spectra of  $\{o\text{-(Ph}_2\text{P)C}_6\text{H}_4\}_2\text{SiPh}_2$  (**1a**).

$^1\text{H}$

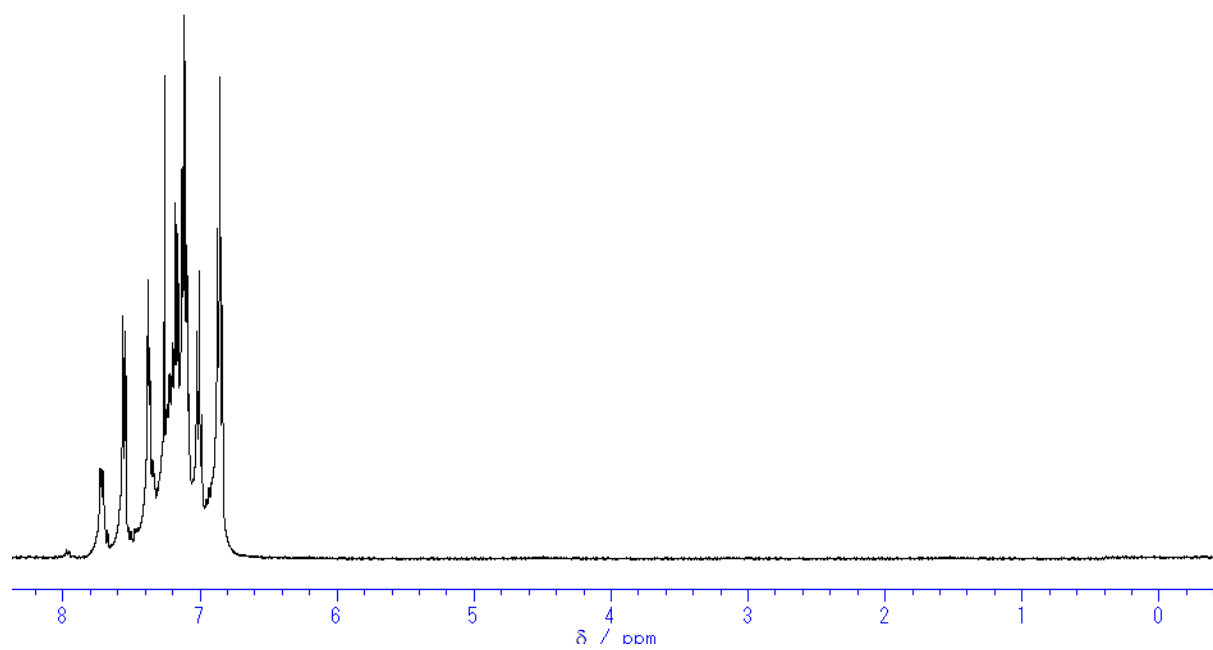

$^{13}\text{C}\{^1\text{H}\}$

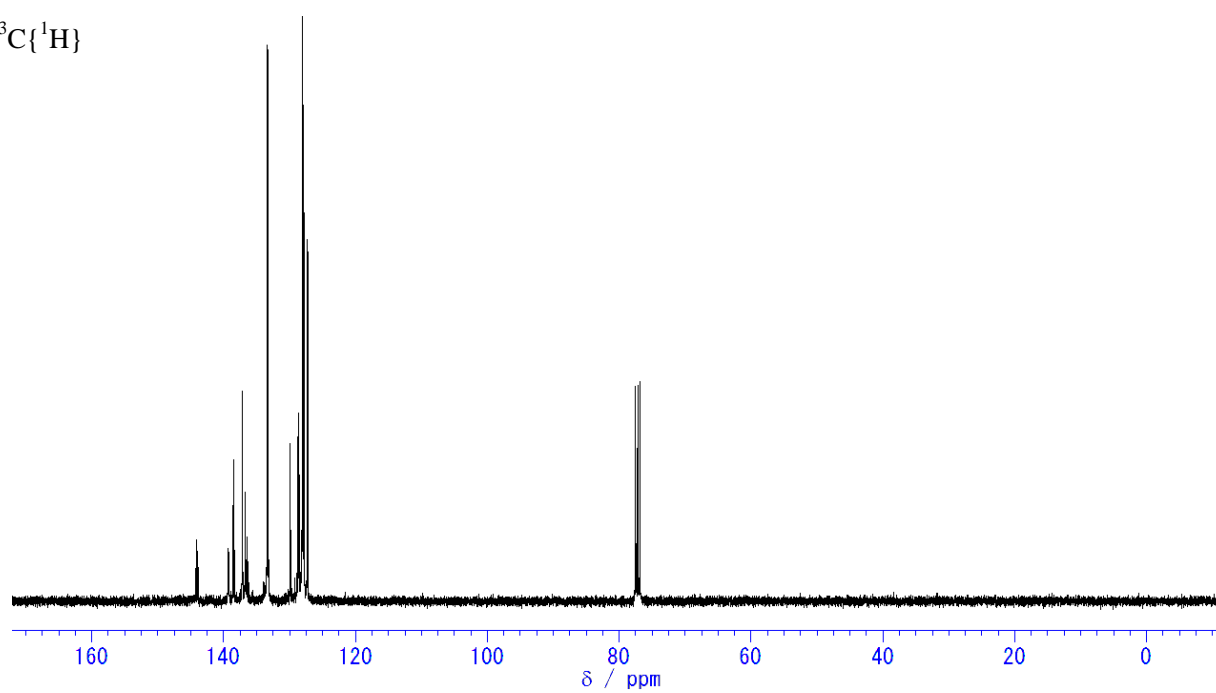

$^{29}\text{S}\{^1\text{H}\}$

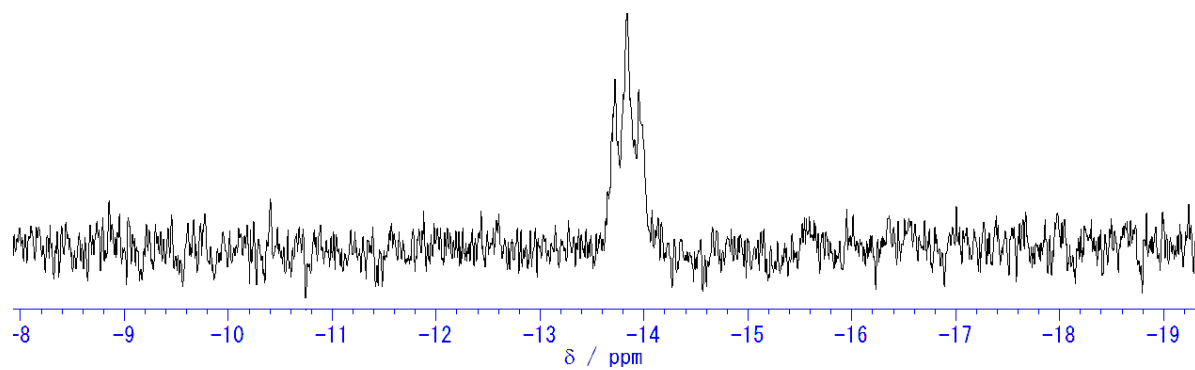

$^{31}\text{P}\{^1\text{H}\}$

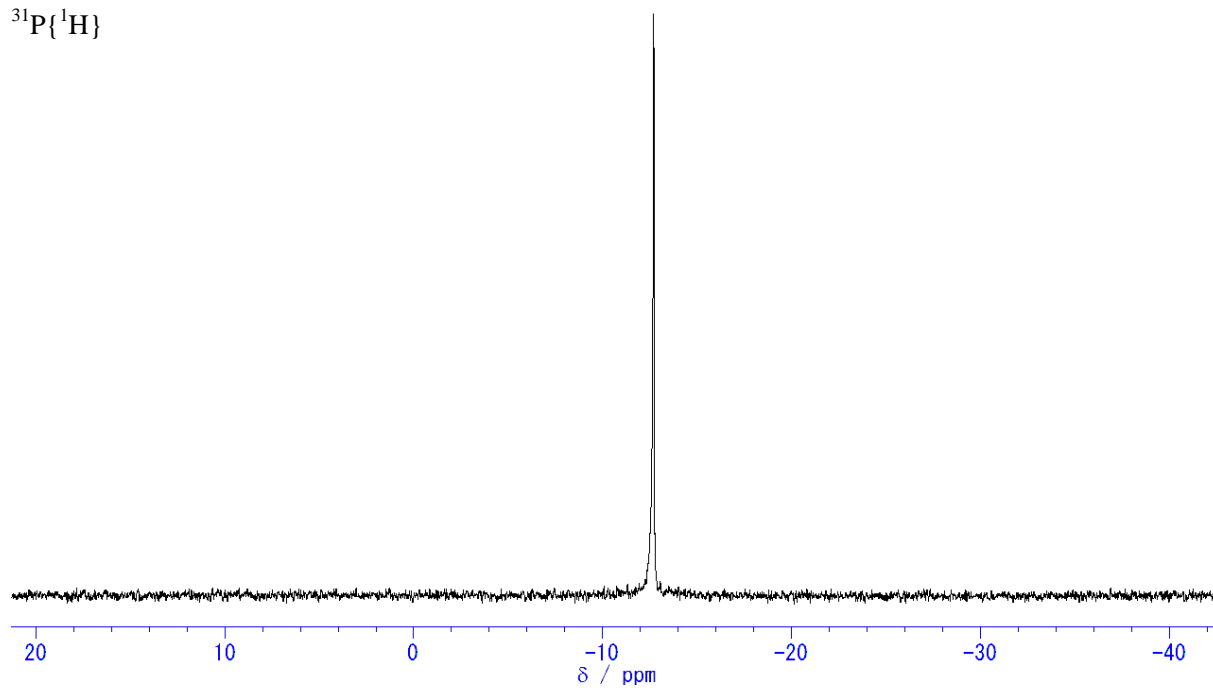

**Figure S10.** NMR spectra of  $\{o\text{-(Ph}_2\text{P)C}_6\text{H}_4\}_2\text{SiMe}_2$  (**1b**).

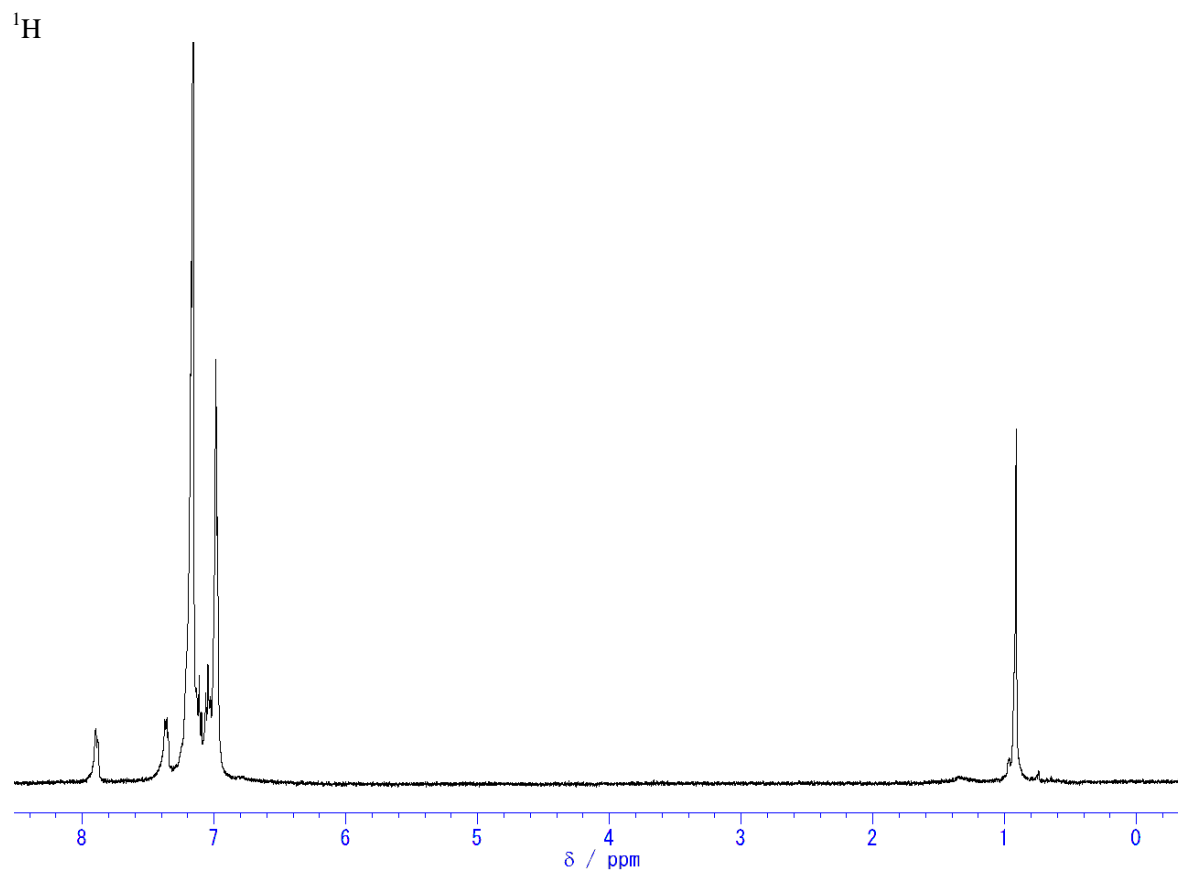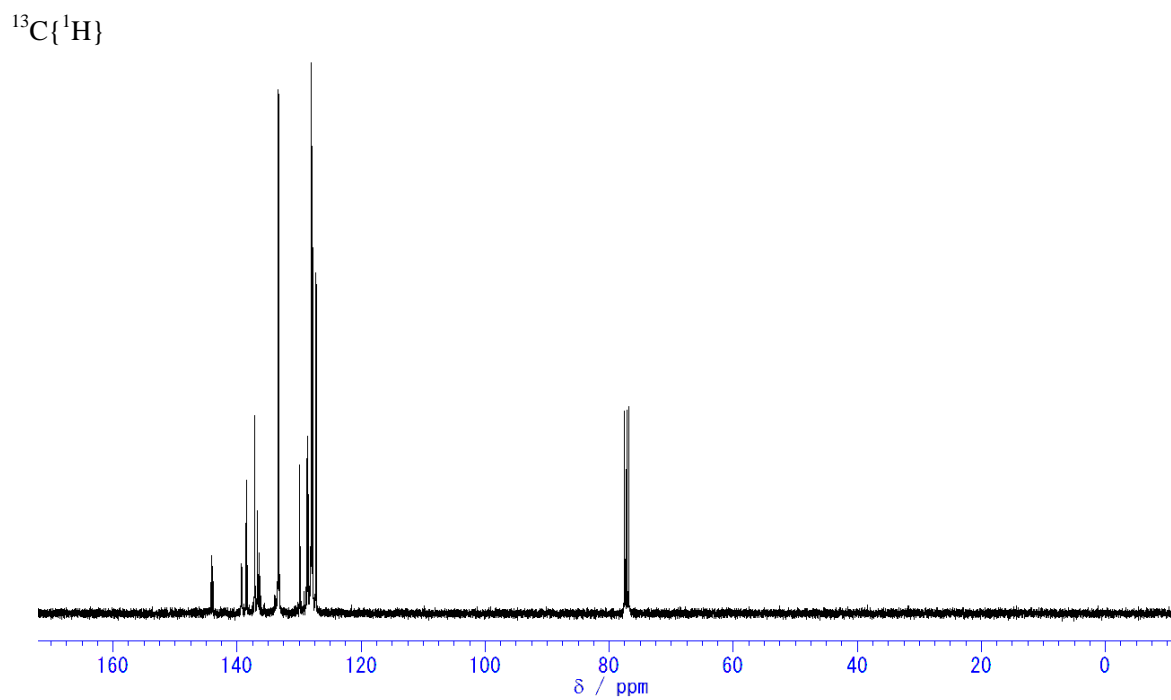



$^{29}\text{Si}\{^1\text{H}\}$

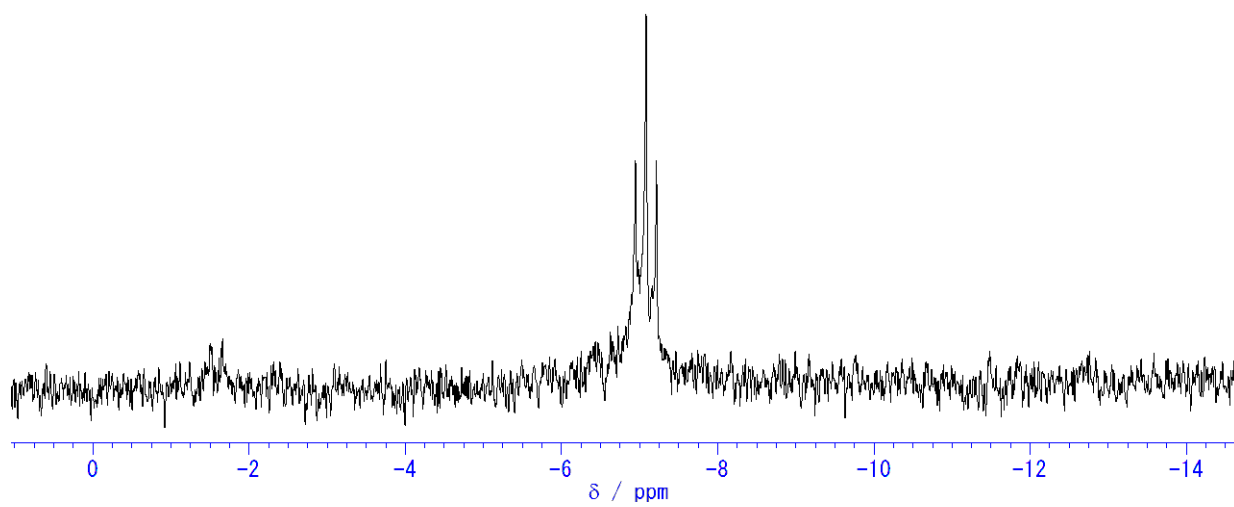

$^{31}\text{P}\{^1\text{H}\}$

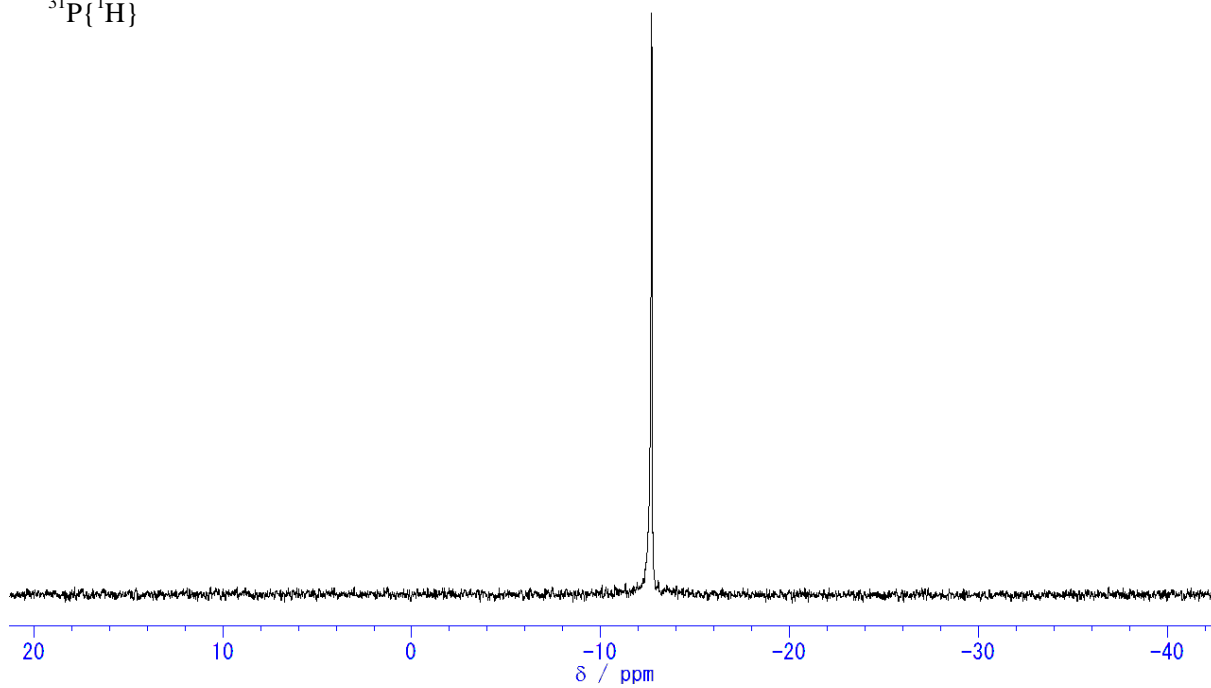

**Figure S11.** NMR spectra of  $\{o\text{-(Ph}_2\text{P)C}_6\text{H}_4\}_2\text{SiEt}_2$  (**1c**).

$^1\text{H}$

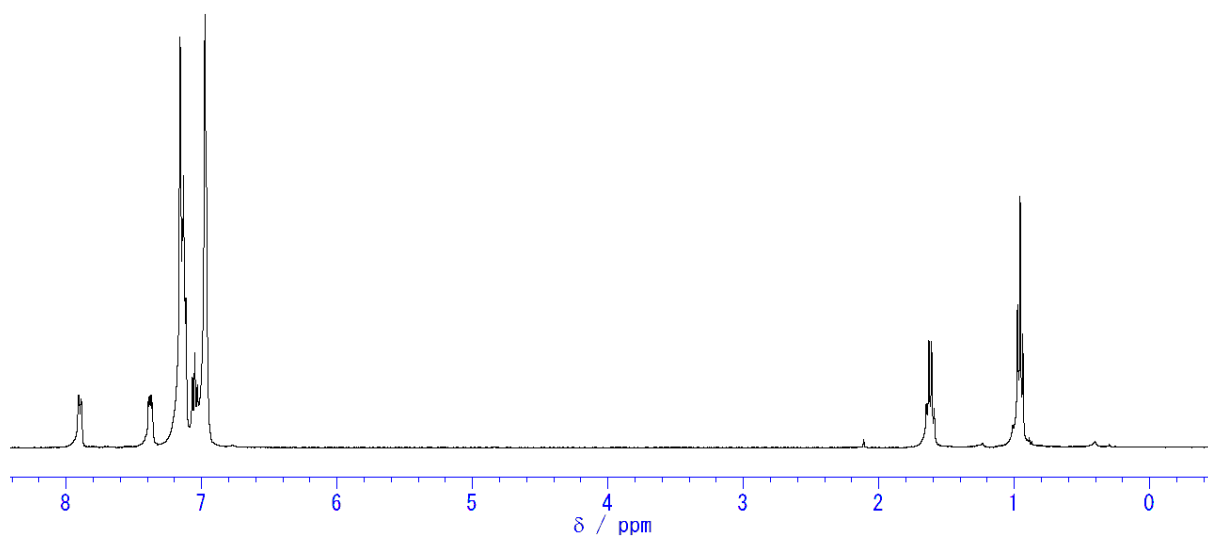

$^{13}\text{C}\{^1\text{H}\}$

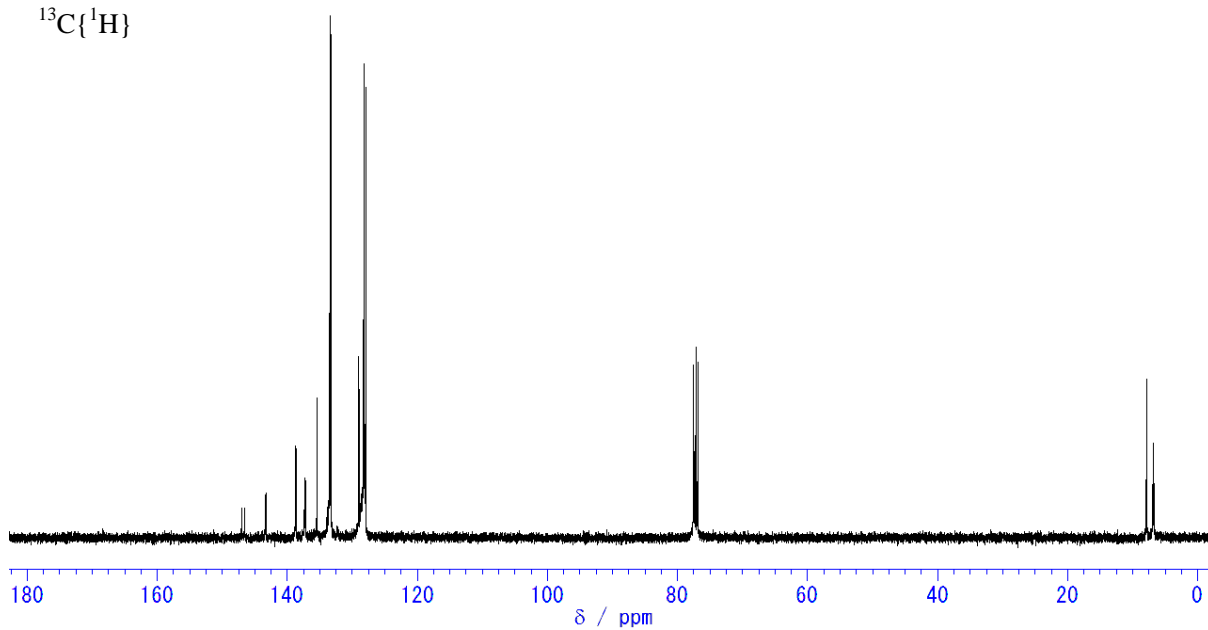

$^{29}\text{Si}\{\text{}^1\text{H}\}$

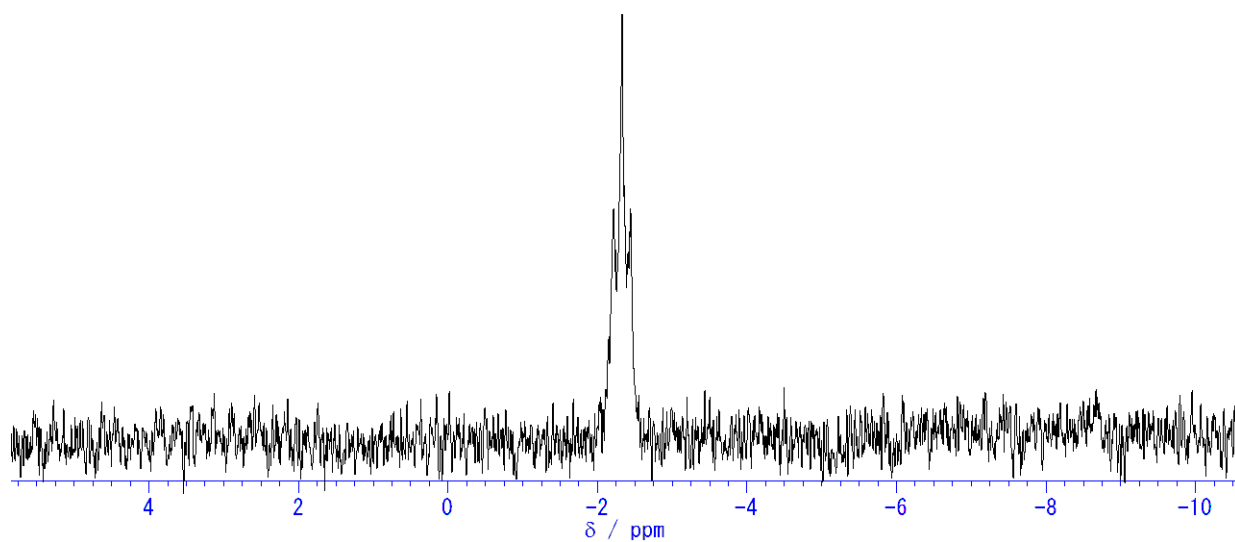

$^{31}\text{P}\{\text{}^1\text{H}\}$

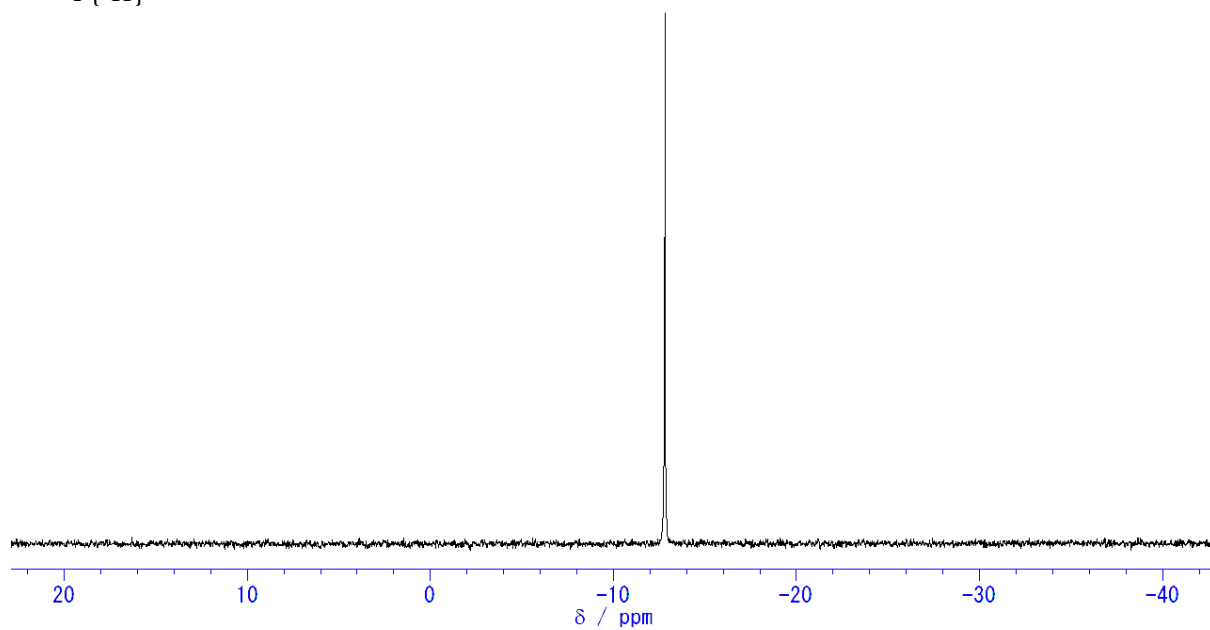

**Figure S12.** NMR spectra of  $\{o\text{-(Ph}_2\text{P)C}_6\text{H}_4\}_2\text{Si(H)(Ph)}$ .

$^1\text{H}$

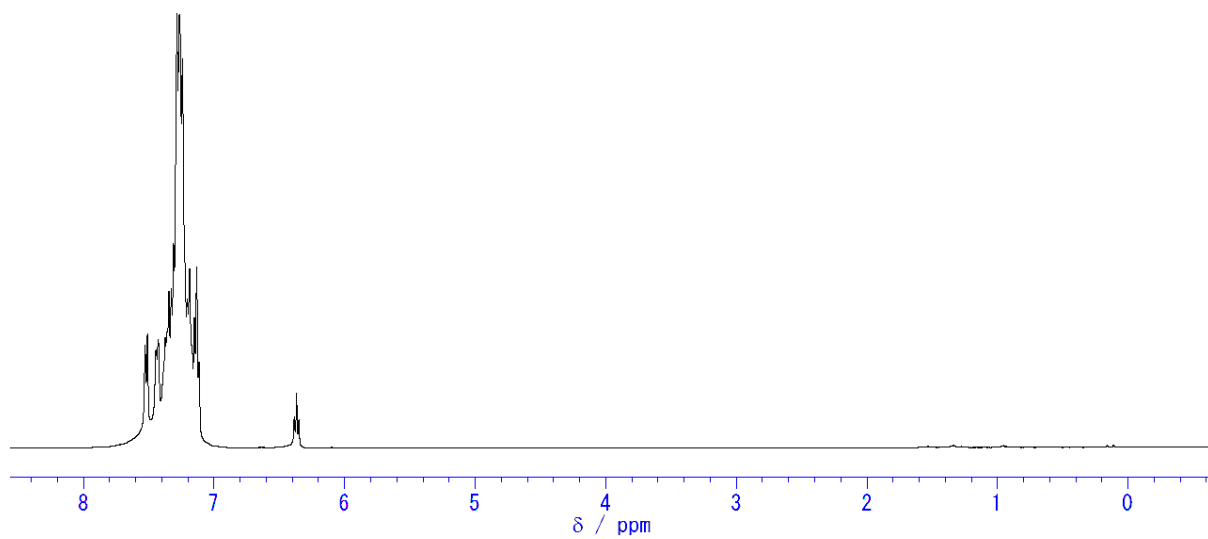

$^{13}\text{C}\{^1\text{H}\}$

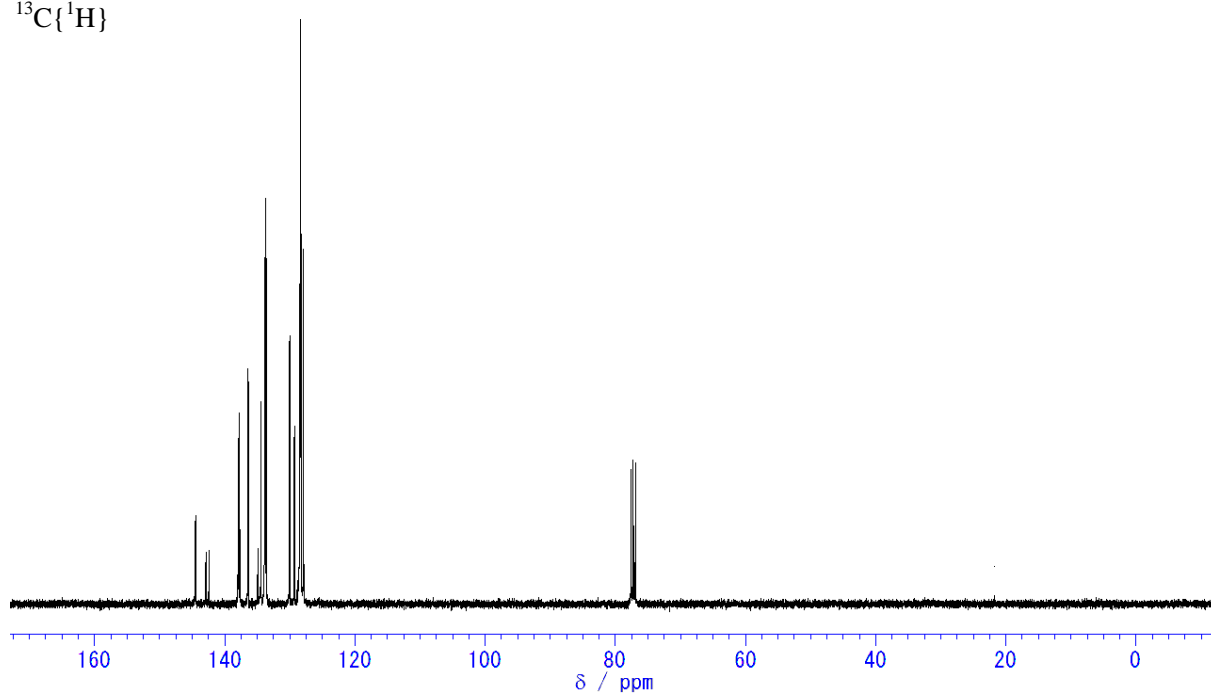

$^{31}\text{P}\{^1\text{H}\}$

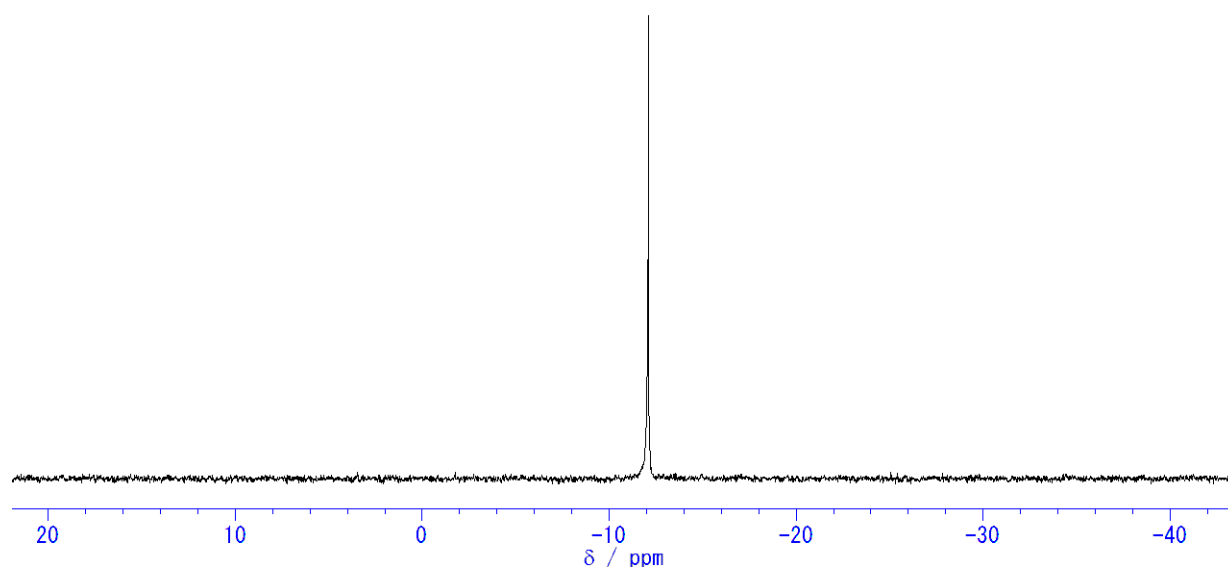

**Figure S13.** NMR spectra of  $\{o\text{-(Ph}_2\text{P)C}_6\text{H}_4\}_2\text{Si(H)(}p\text{-tolyl)}$ .

$^1\text{H}$

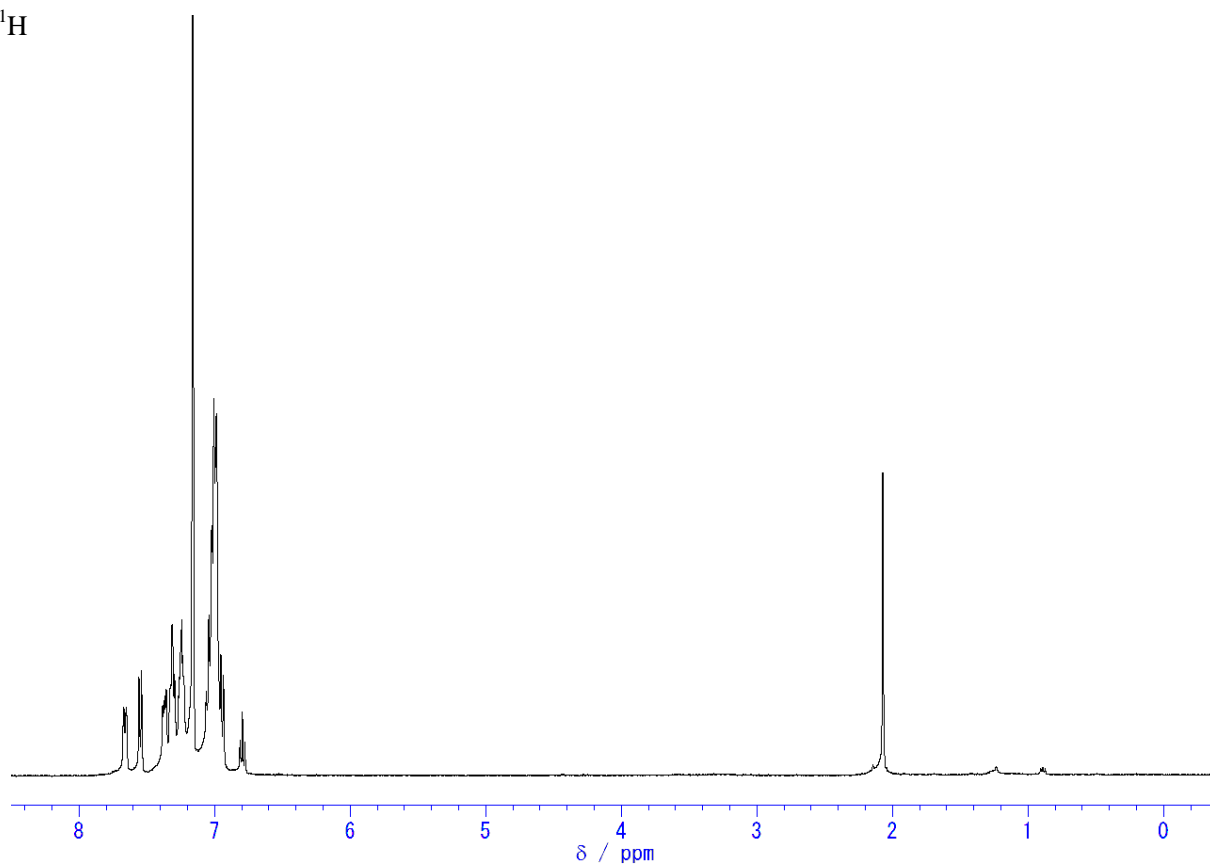

$^{13}\text{C}\{^1\text{H}\}$

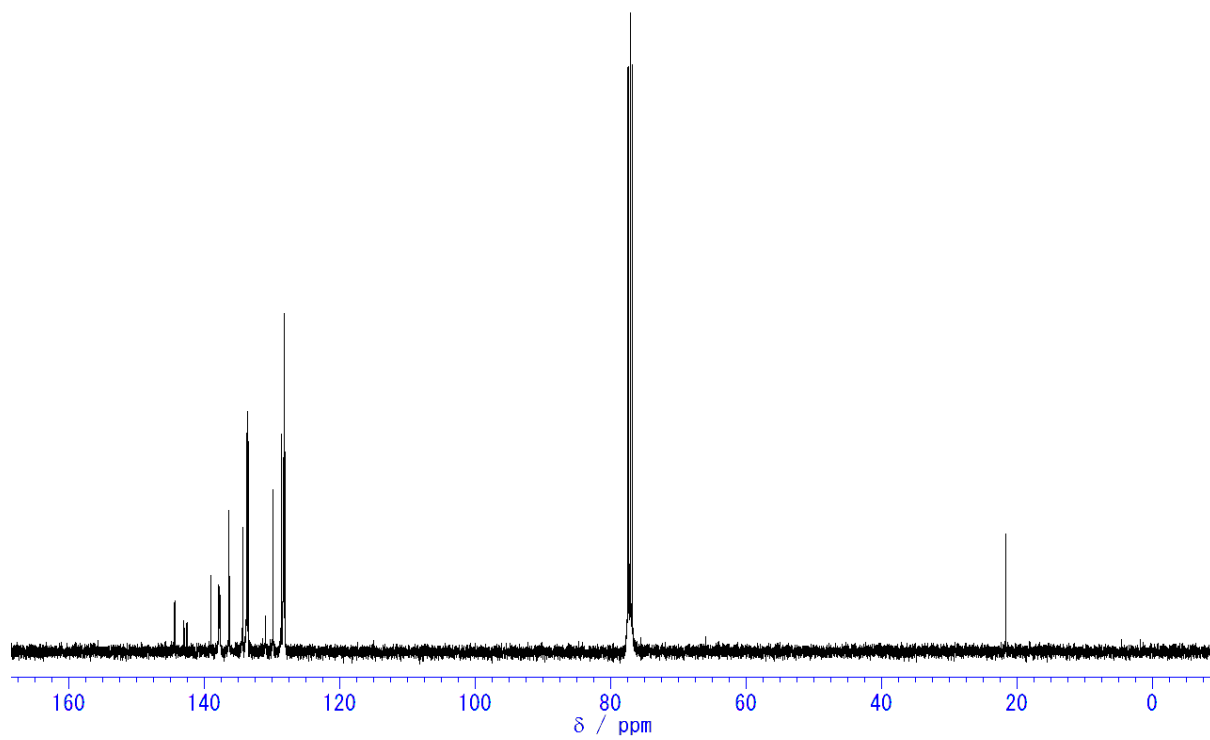

$^{31}\text{P}\{^1\text{H}\}$

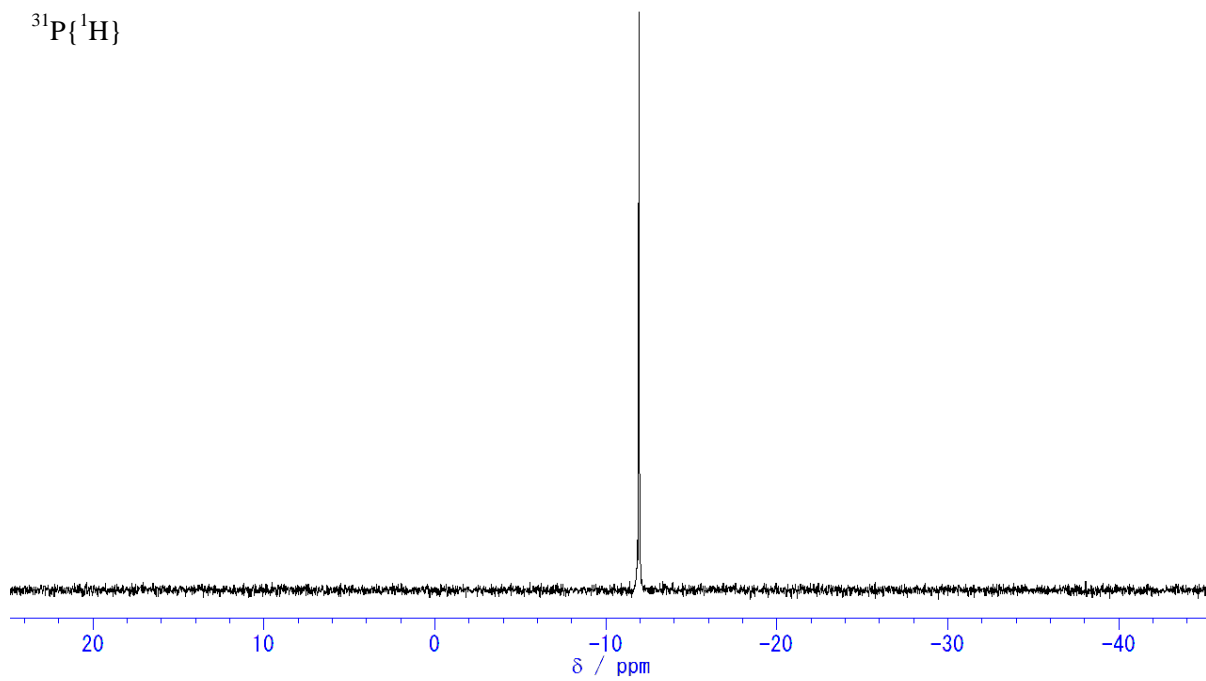



**Figure S14.** NMR spectra of  $\{o\text{-(Ph}_2\text{P)C}_6\text{H}_4\}_2\text{Si(H)(}p\text{-methoxyphenyl)}$ .

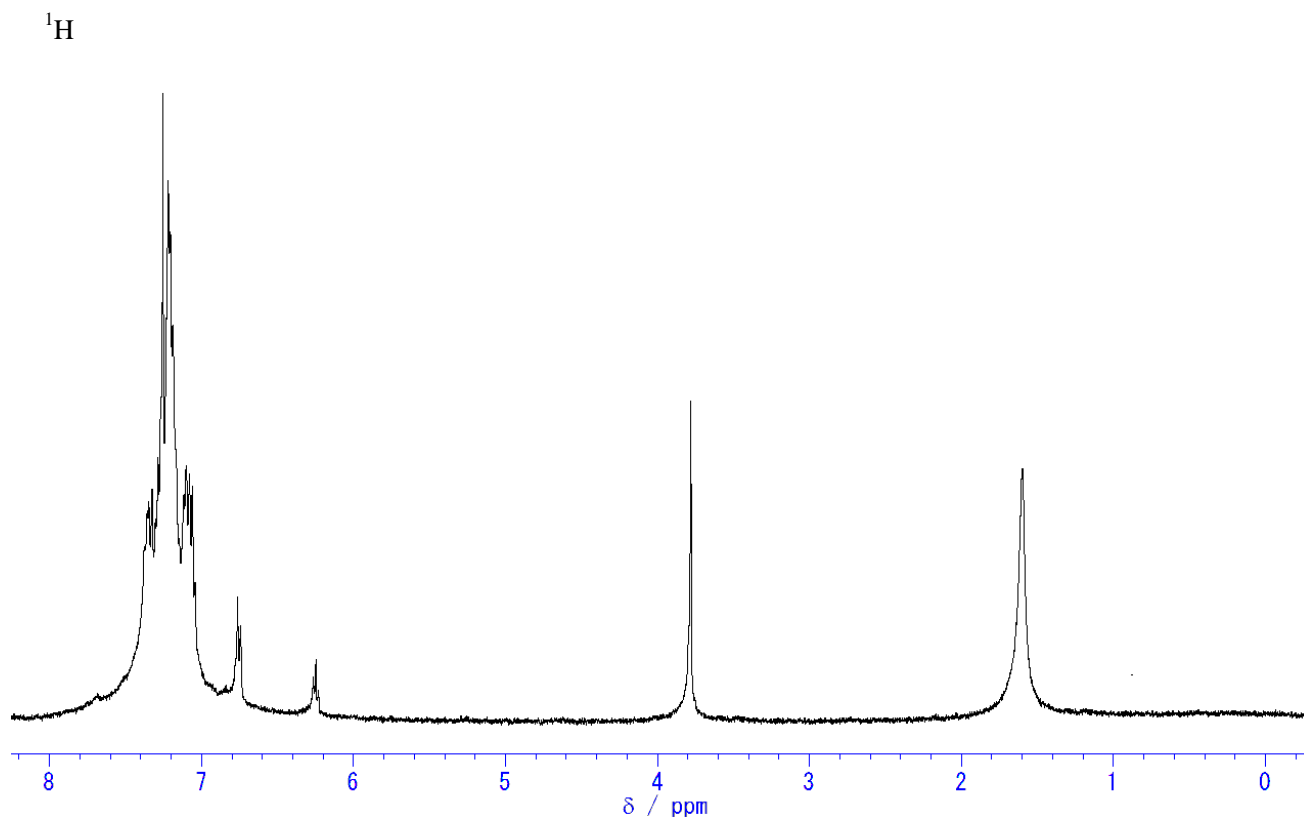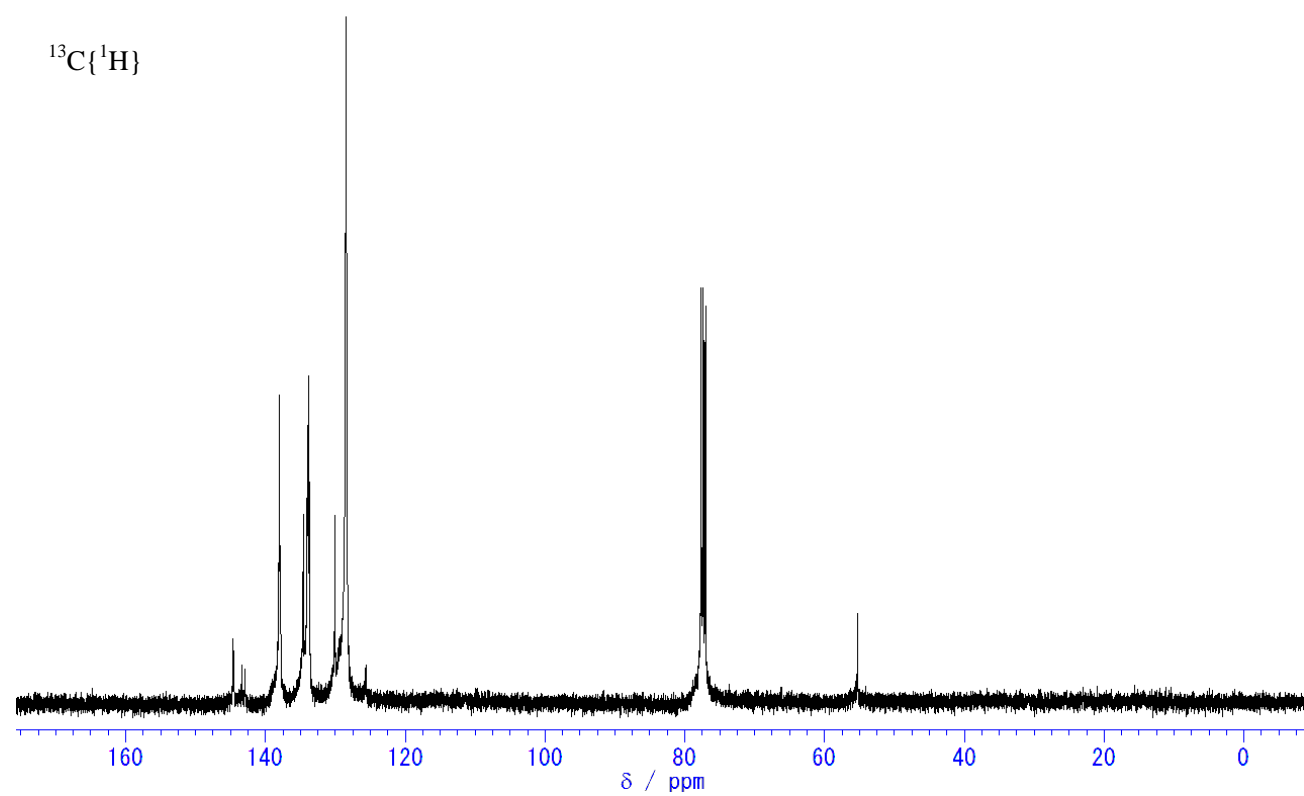

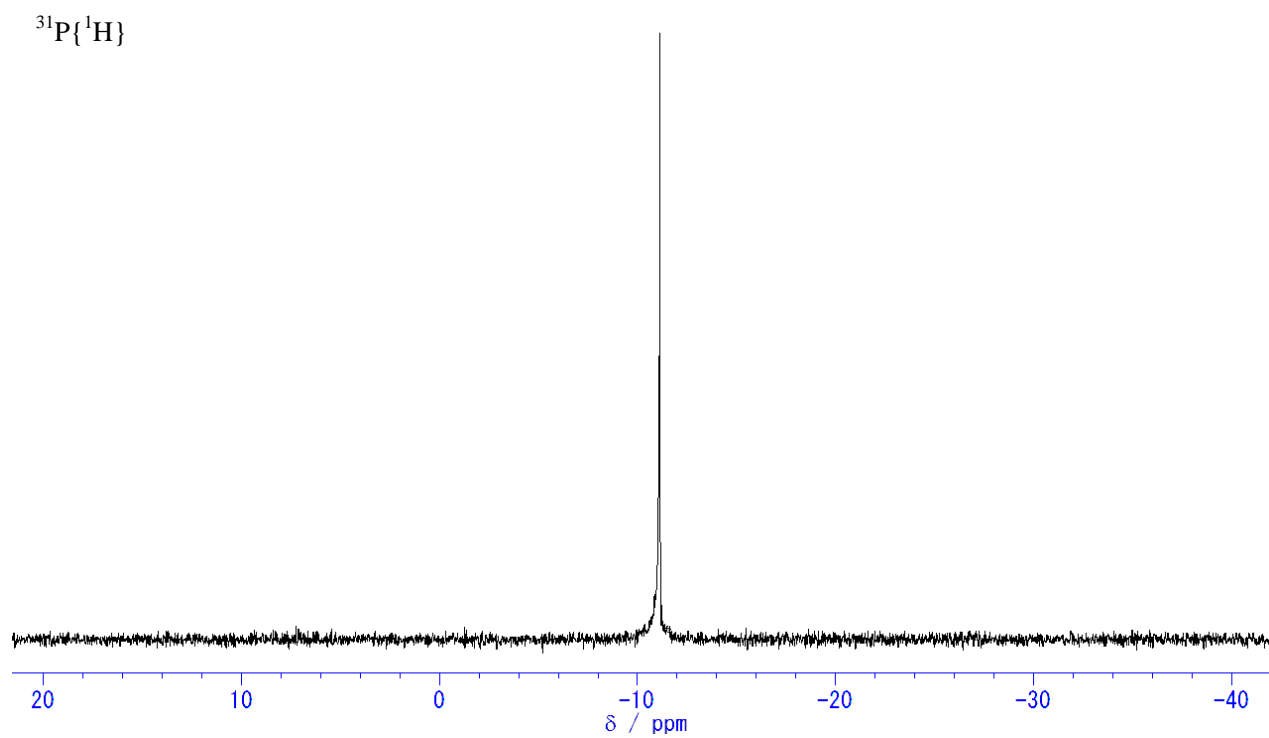

**Figure 15.** NMR spectra of  $\{o\text{-(Ph}_2\text{P)C}_6\text{H}_4\}_2\text{Si(H)(}p\text{-dimethylaminophenyl)}$ .

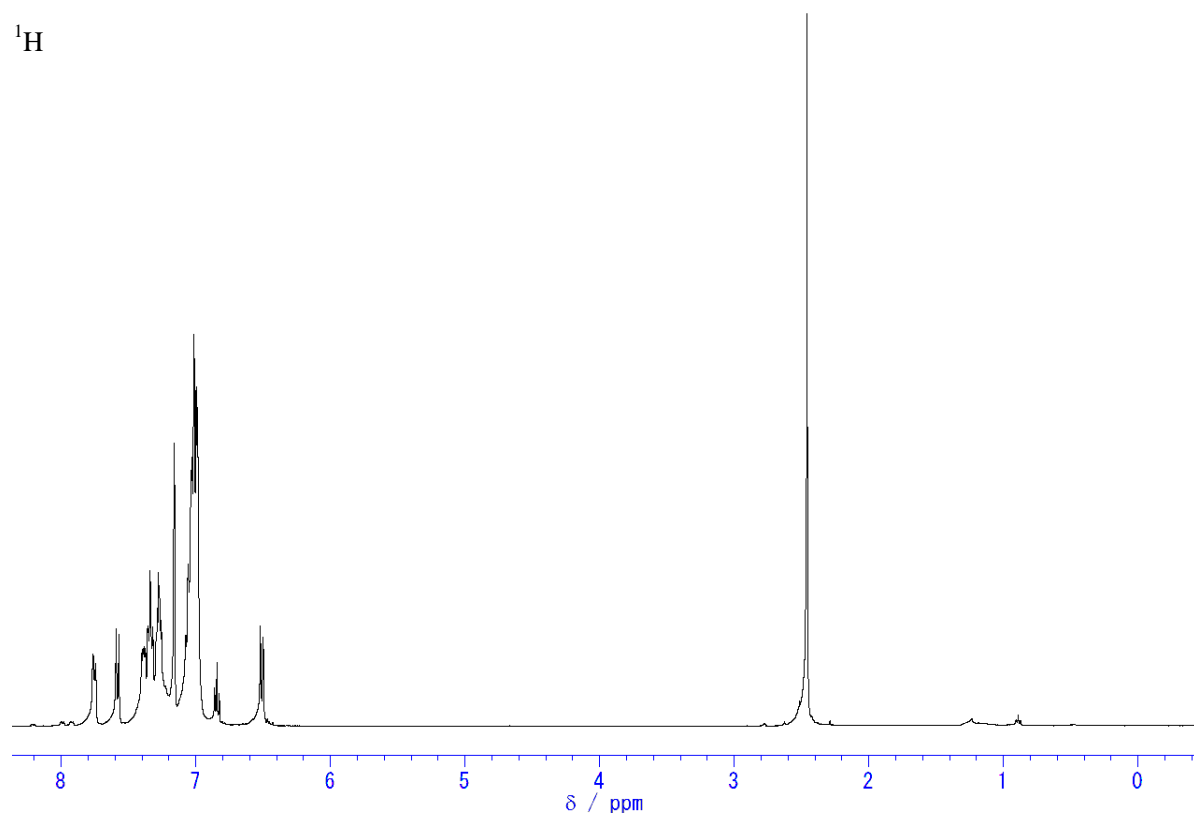

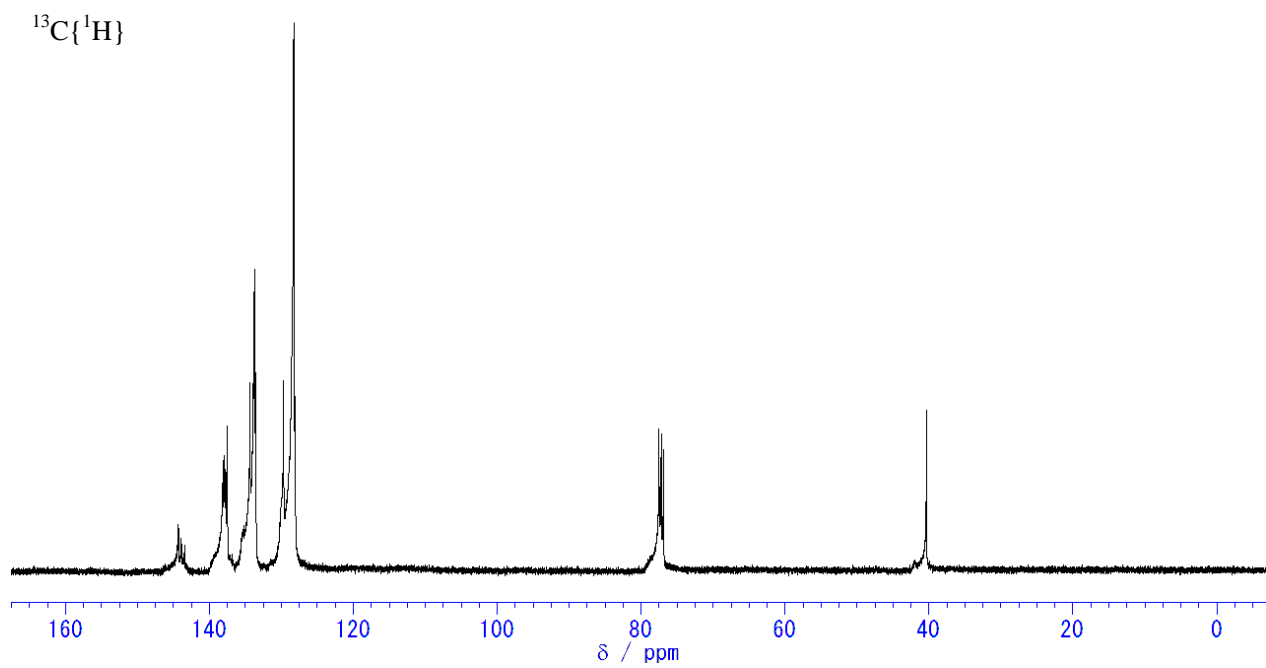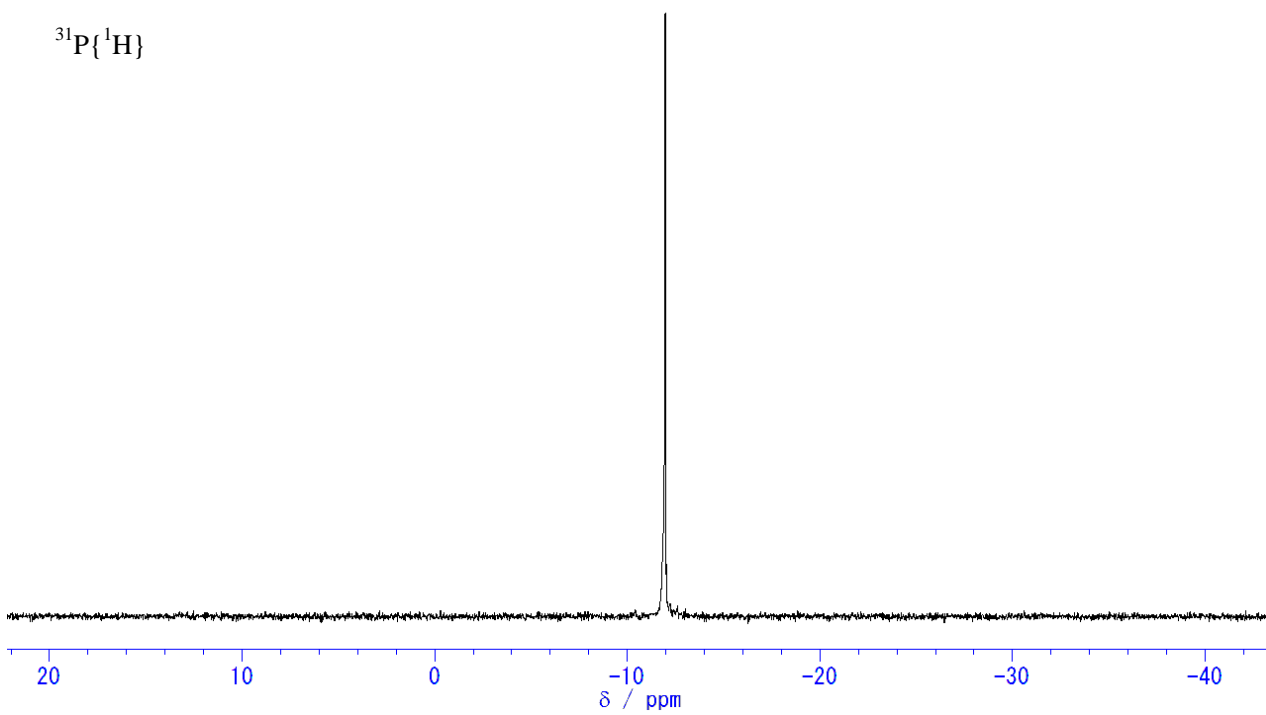

**Figure S16.** NMR spectra of  $\{o\text{-(Ph}_2\text{P)C}_6\text{H}_4\}_2\text{Si(H)(}p\text{-fluorophenyl)}$ .

$^1\text{H}$

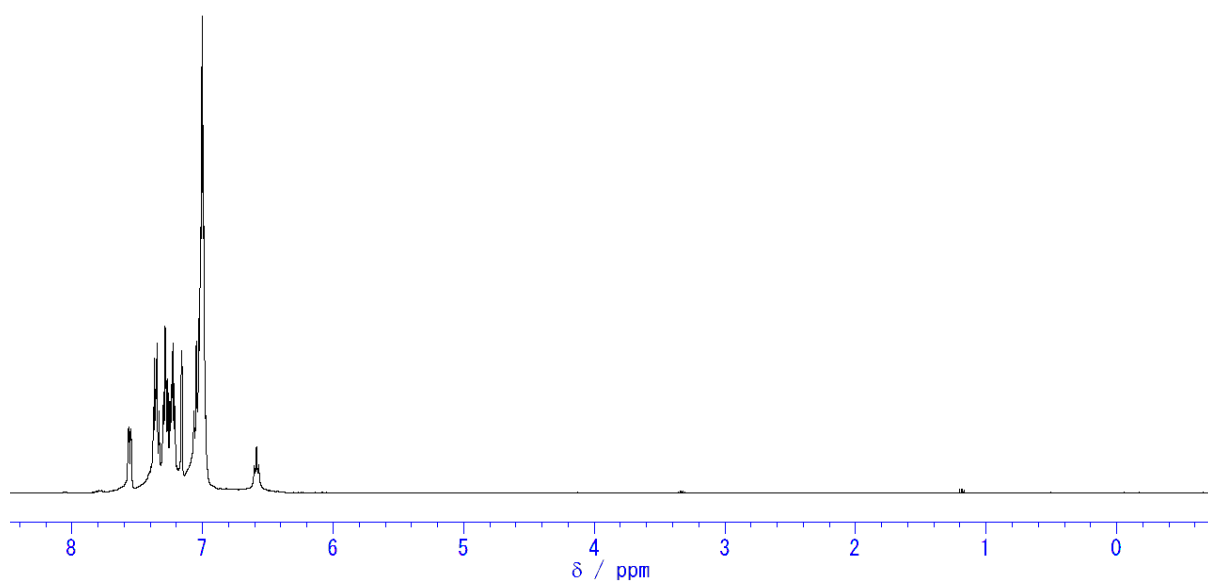

$^{13}\text{C}\{^1\text{H}\}$

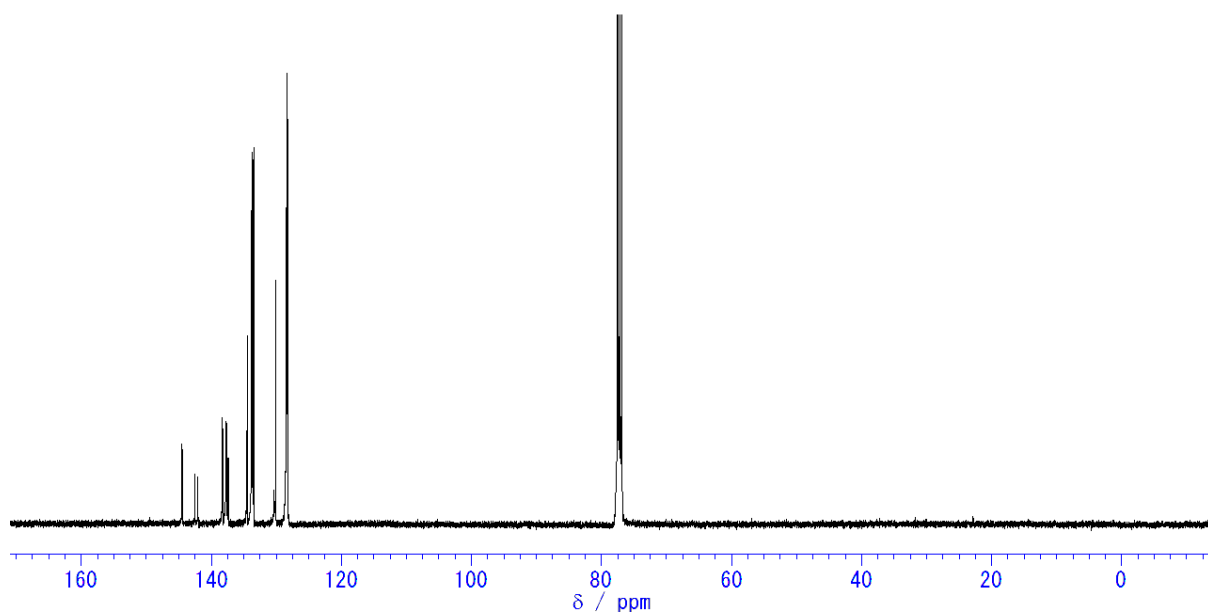

$^{19}\text{F}\{^1\text{H}\}$

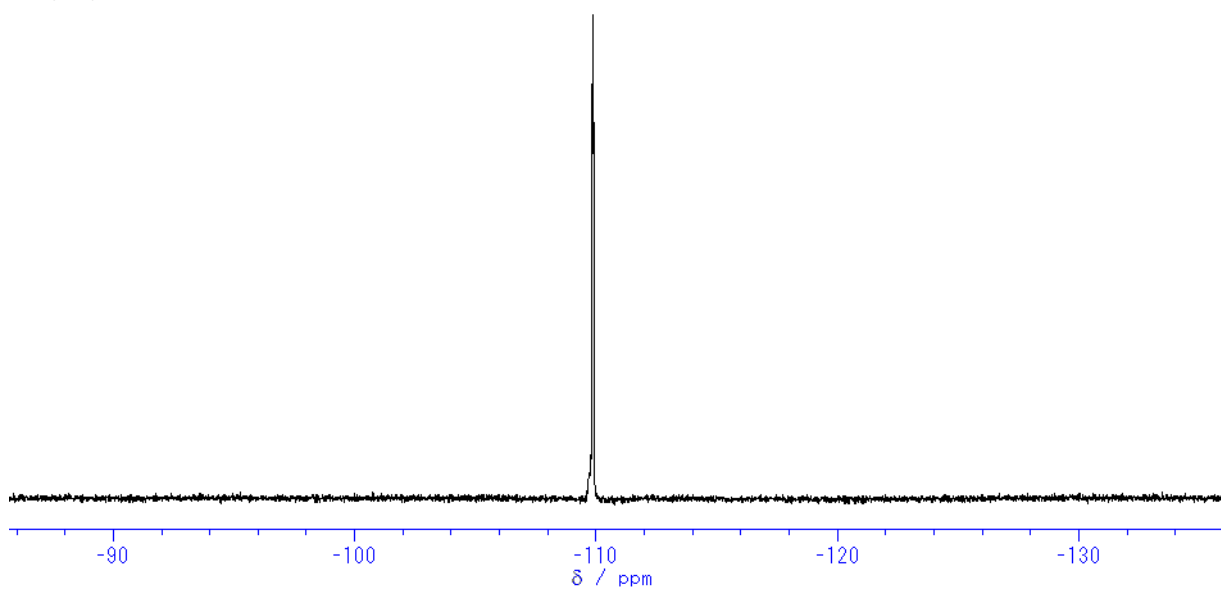

$^{31}\text{P}\{^1\text{H}\}$

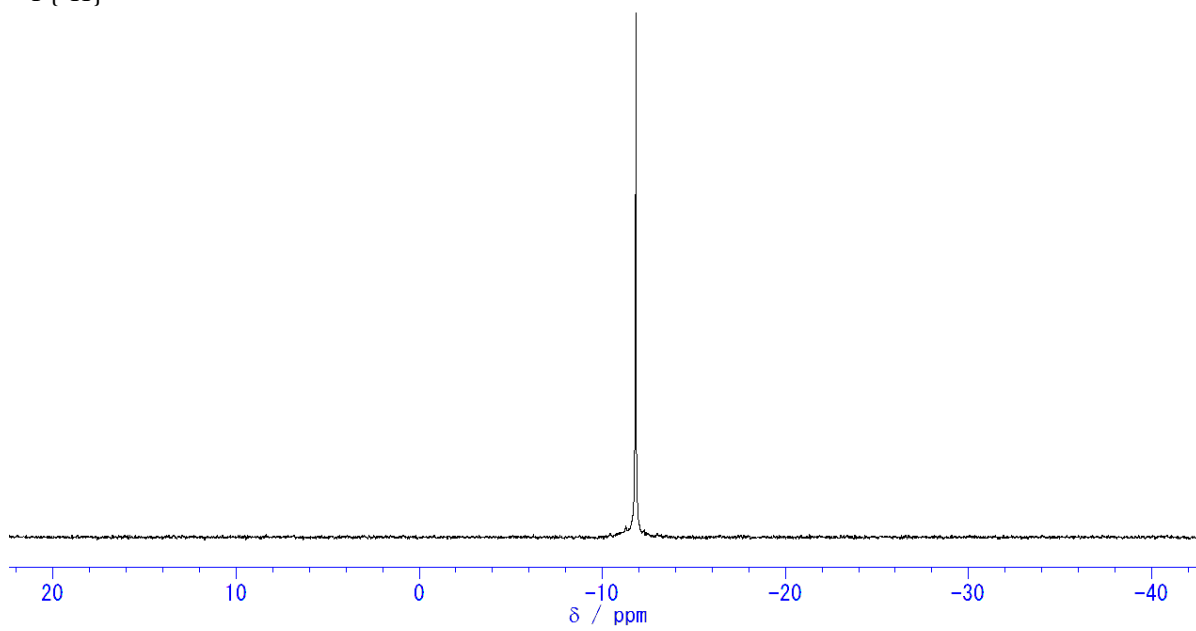

**Figure S17.** NMR spectra of  $\{o\text{-(Ph}_2\text{P)C}_6\text{H}_4\}_2\text{Si(Me)(Ph)}$  (**4b**).

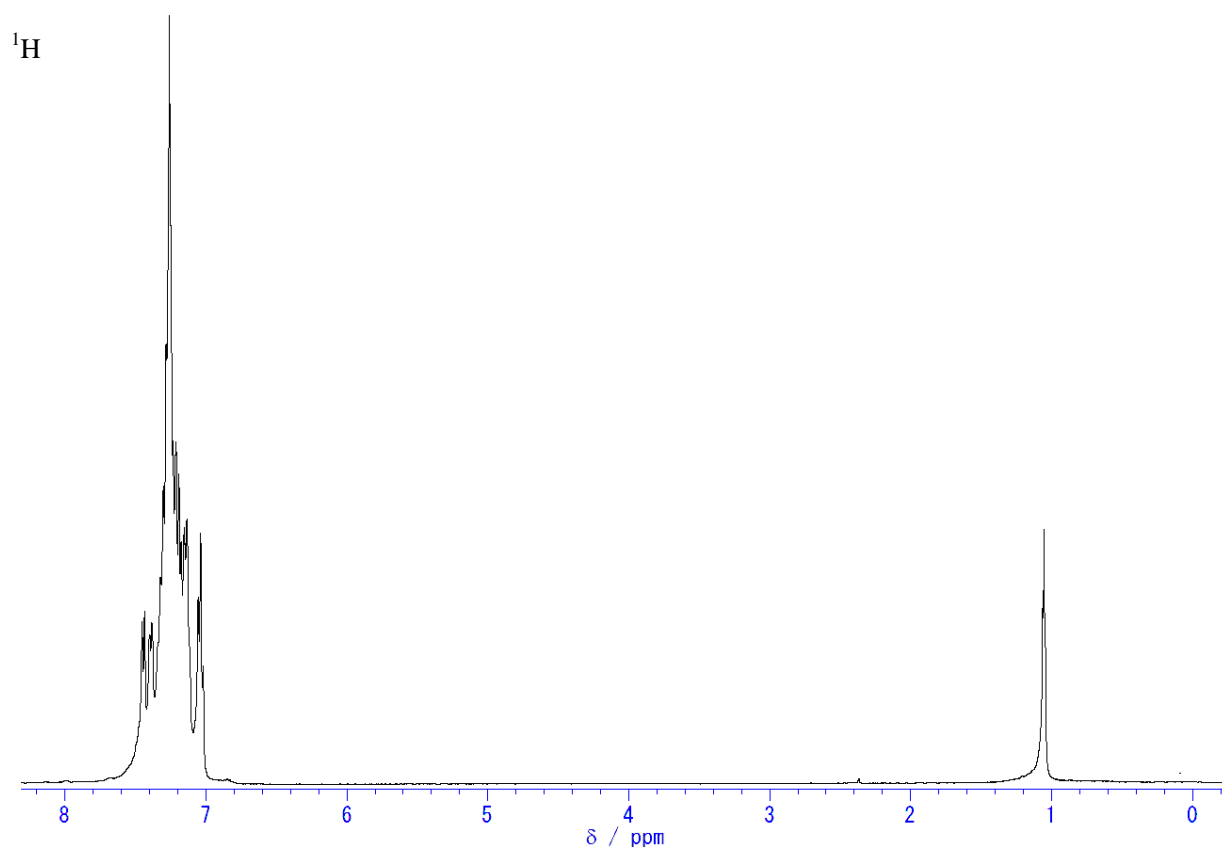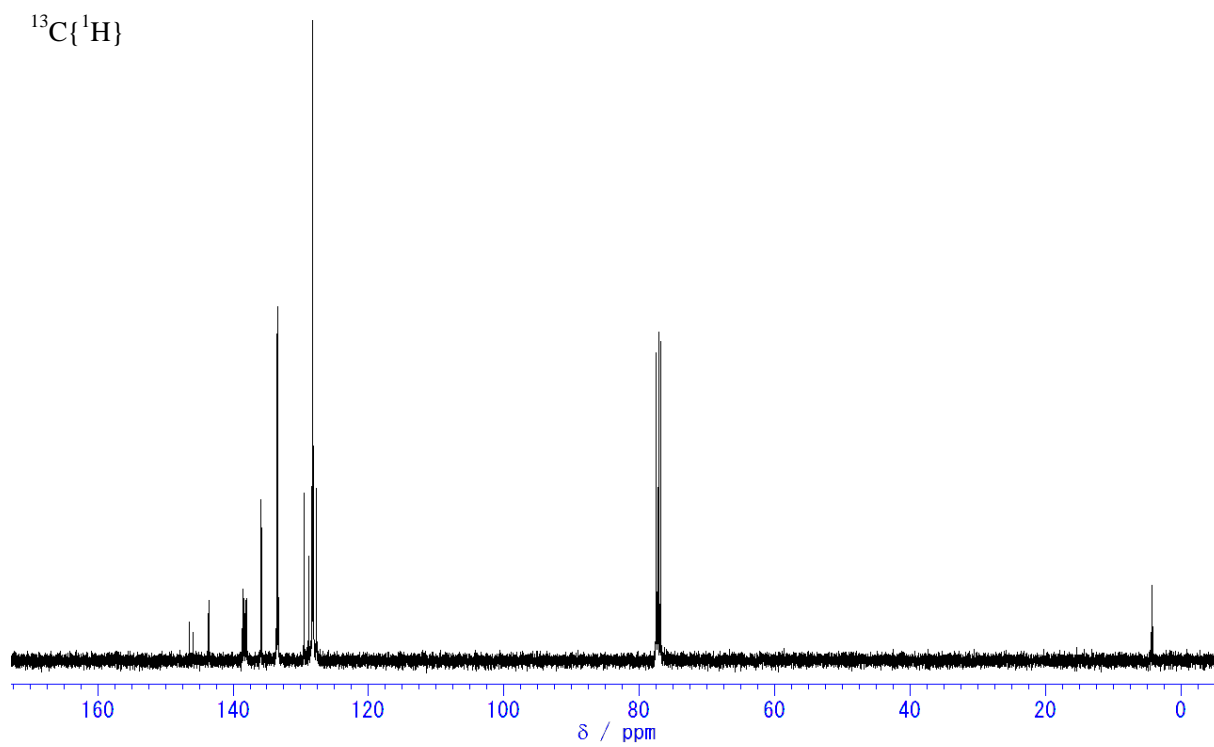

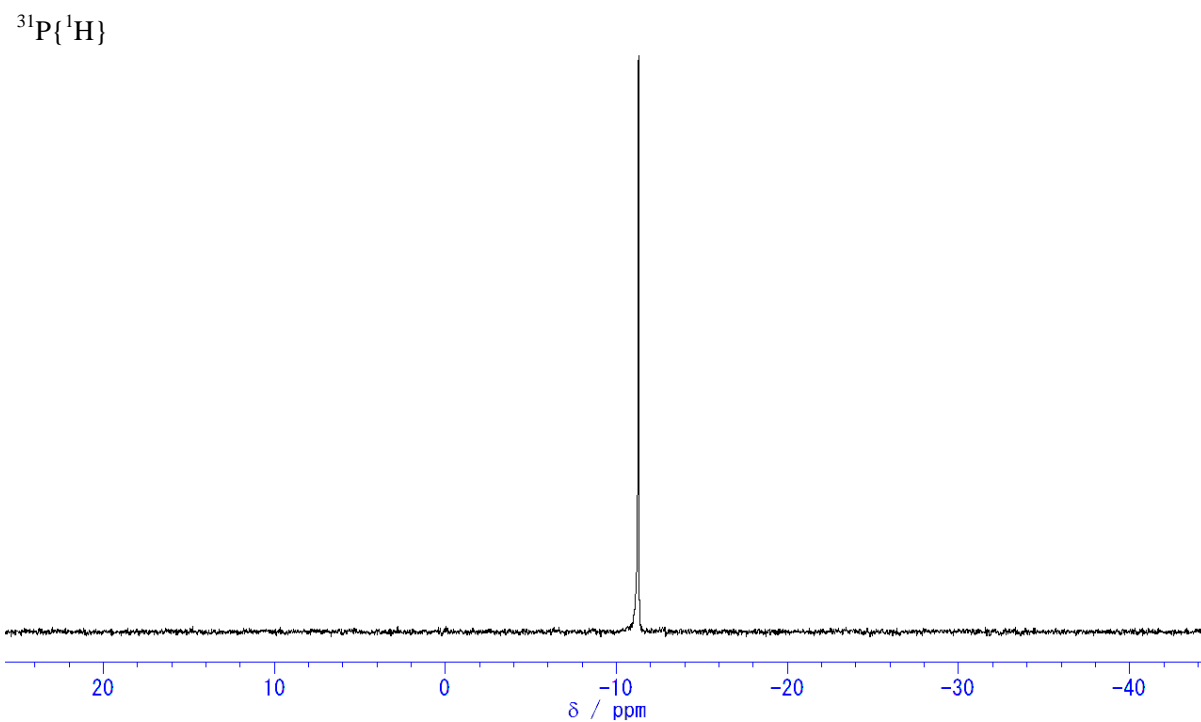

**Figure S18.** NMR spectra of  $\{o\text{-(Ph}_2\text{P)C}_6\text{H}_4\}_2\text{Si(Me)(Et)}$  (**4c**).

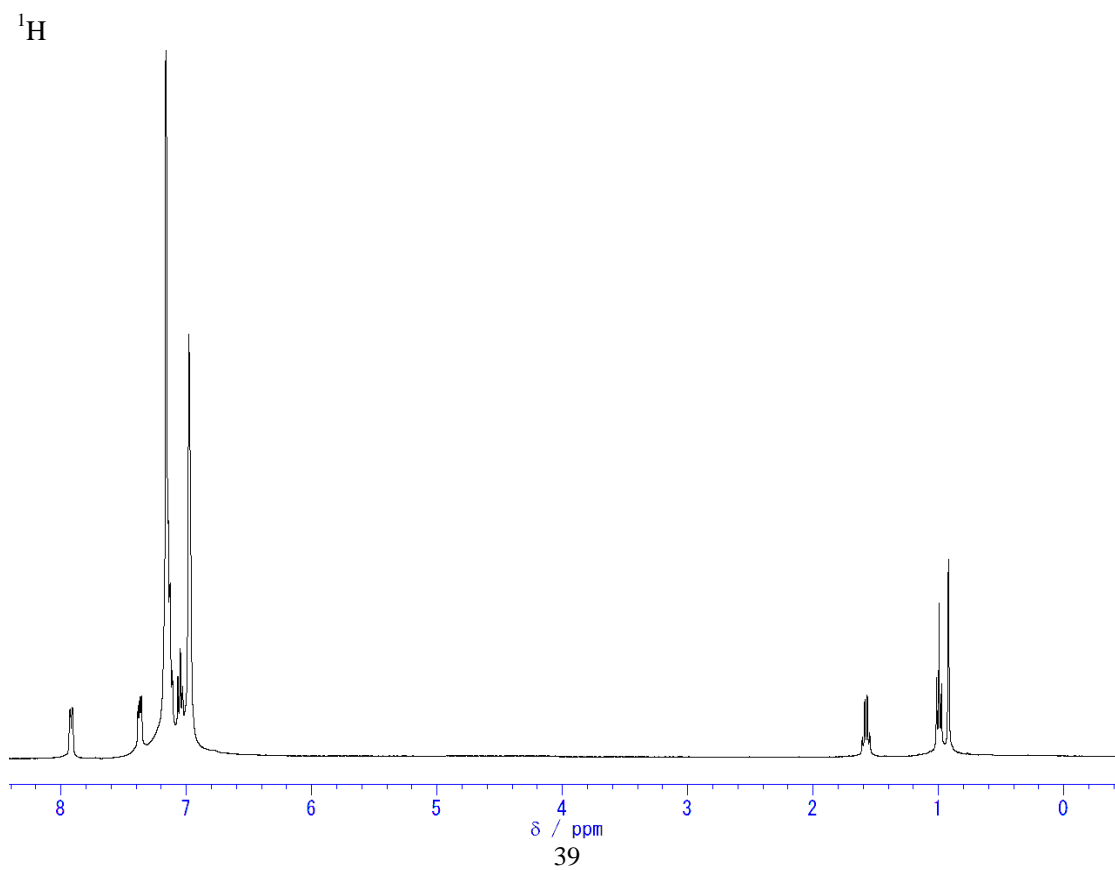



$^{13}\text{C}\{^1\text{H}\}$

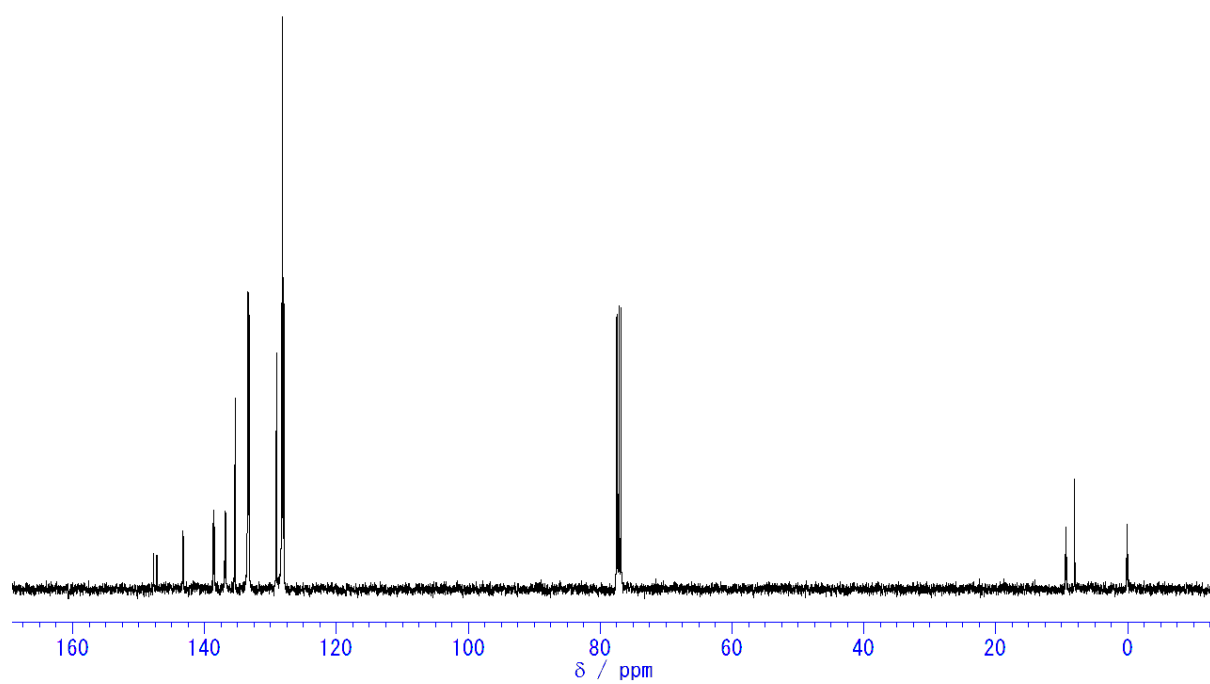

$^{31}\text{P}\{^1\text{H}\}$

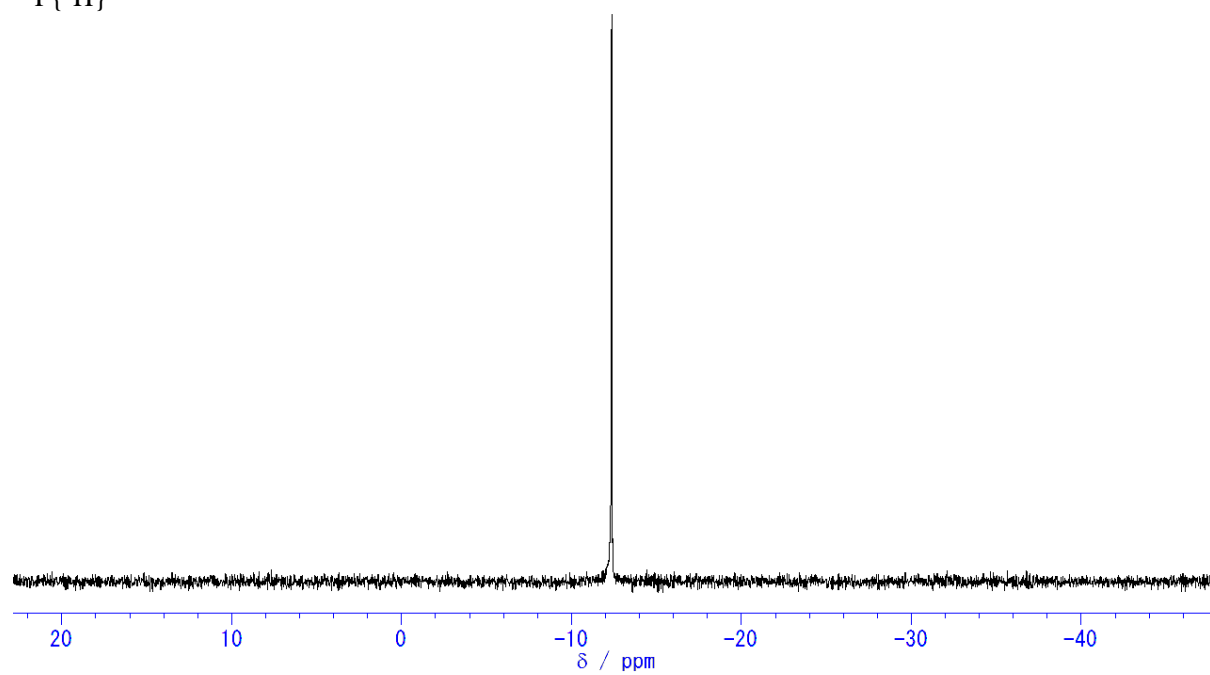

**Figure S19.** NMR spectra of  $\{o\text{-(Ph}_2\text{P)C}_6\text{H}_4\}_2\text{Si(Me)(Cl)}$ .

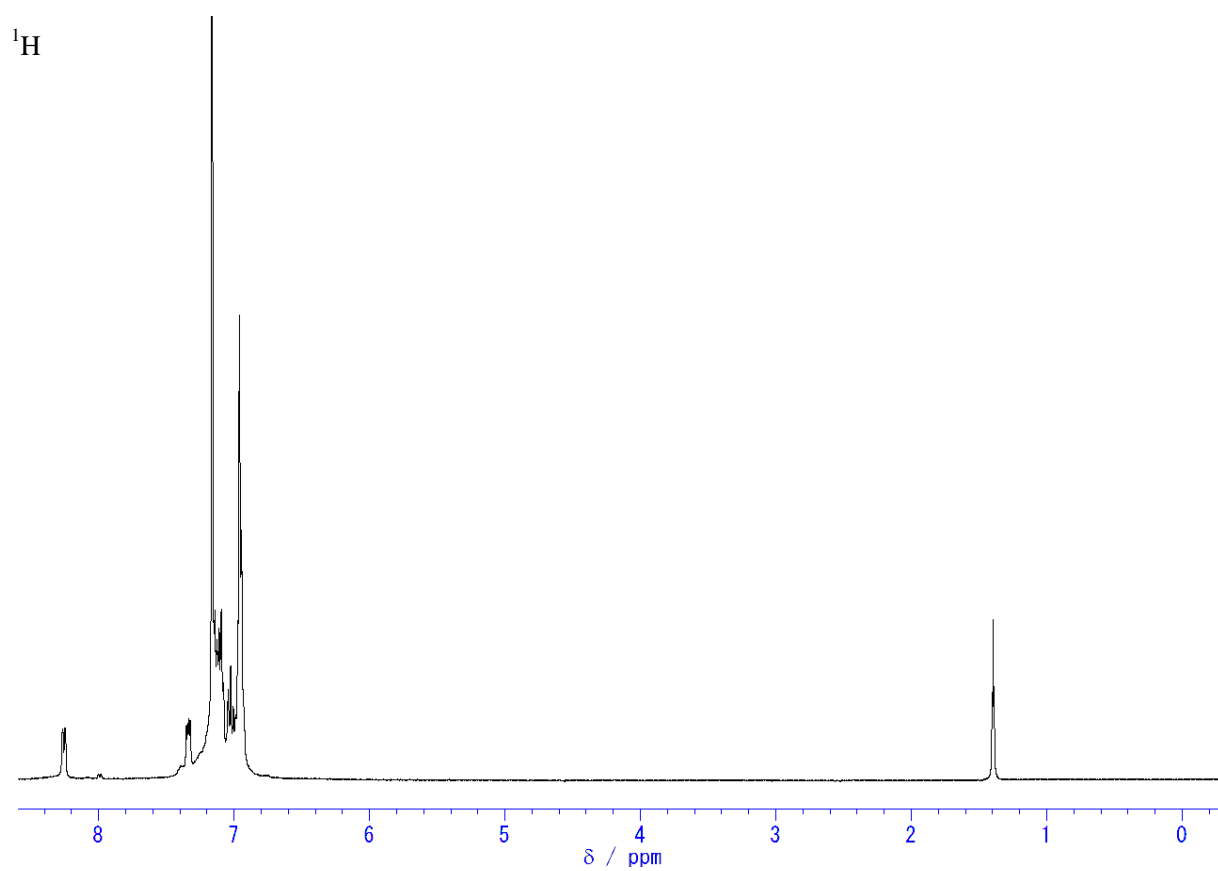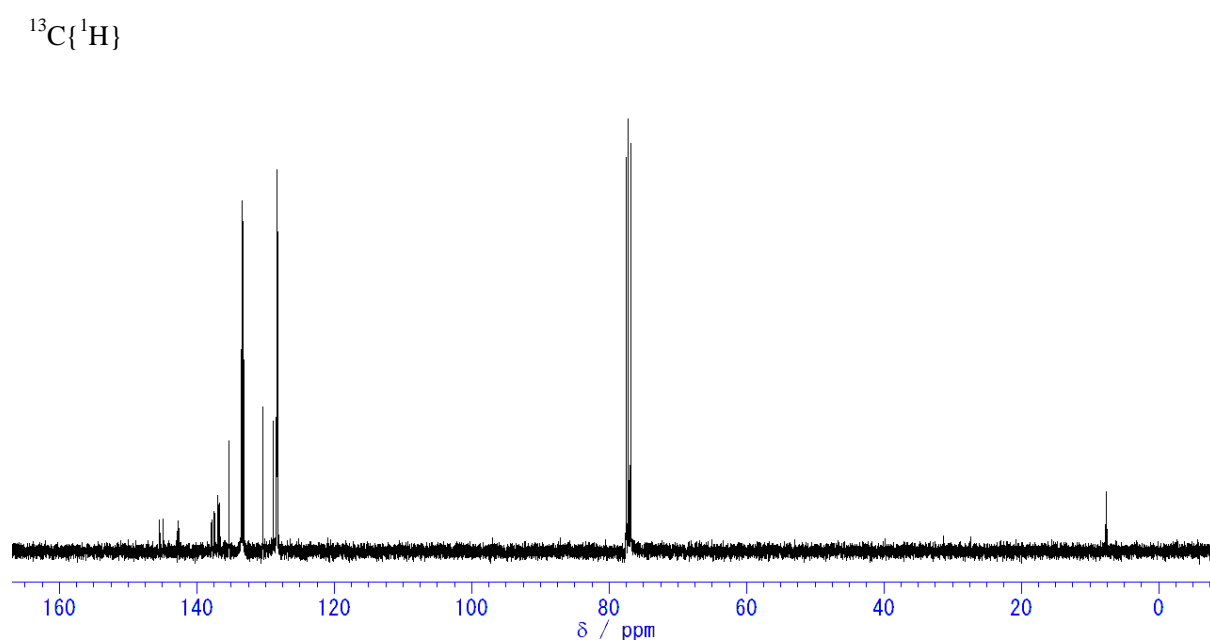

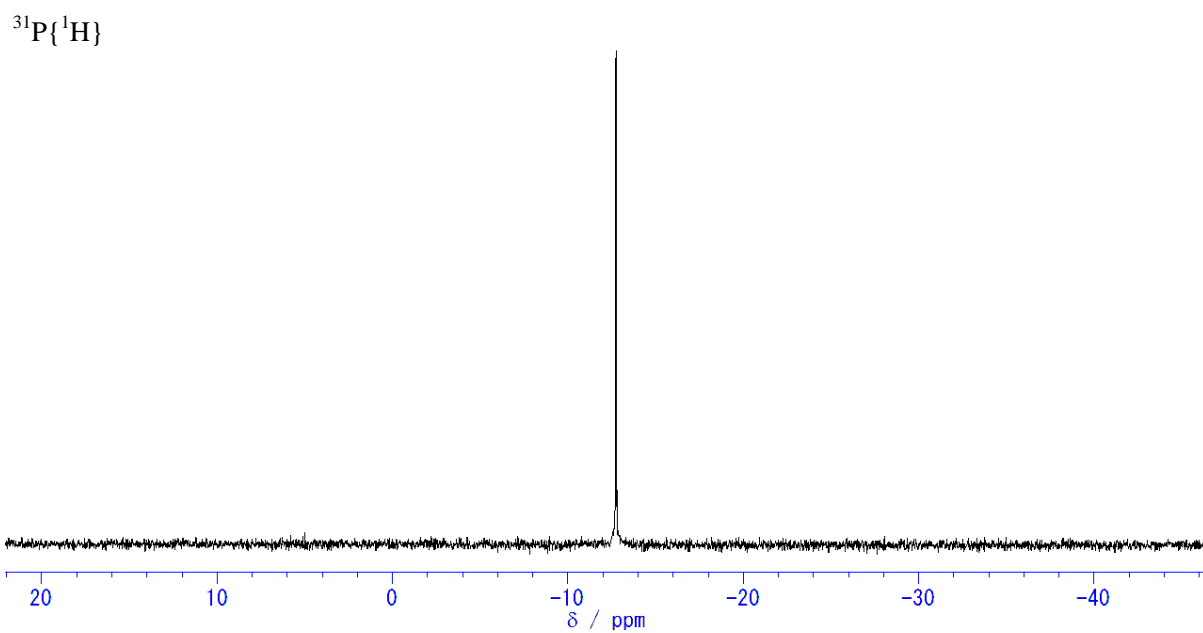

**Figure S20.** NMR spectra of  $\{o\text{-(Ph}_2\text{P)C}_6\text{H}_4\}_2\text{Si(Me)(}p\text{-tolyl)}$  (**4d**).

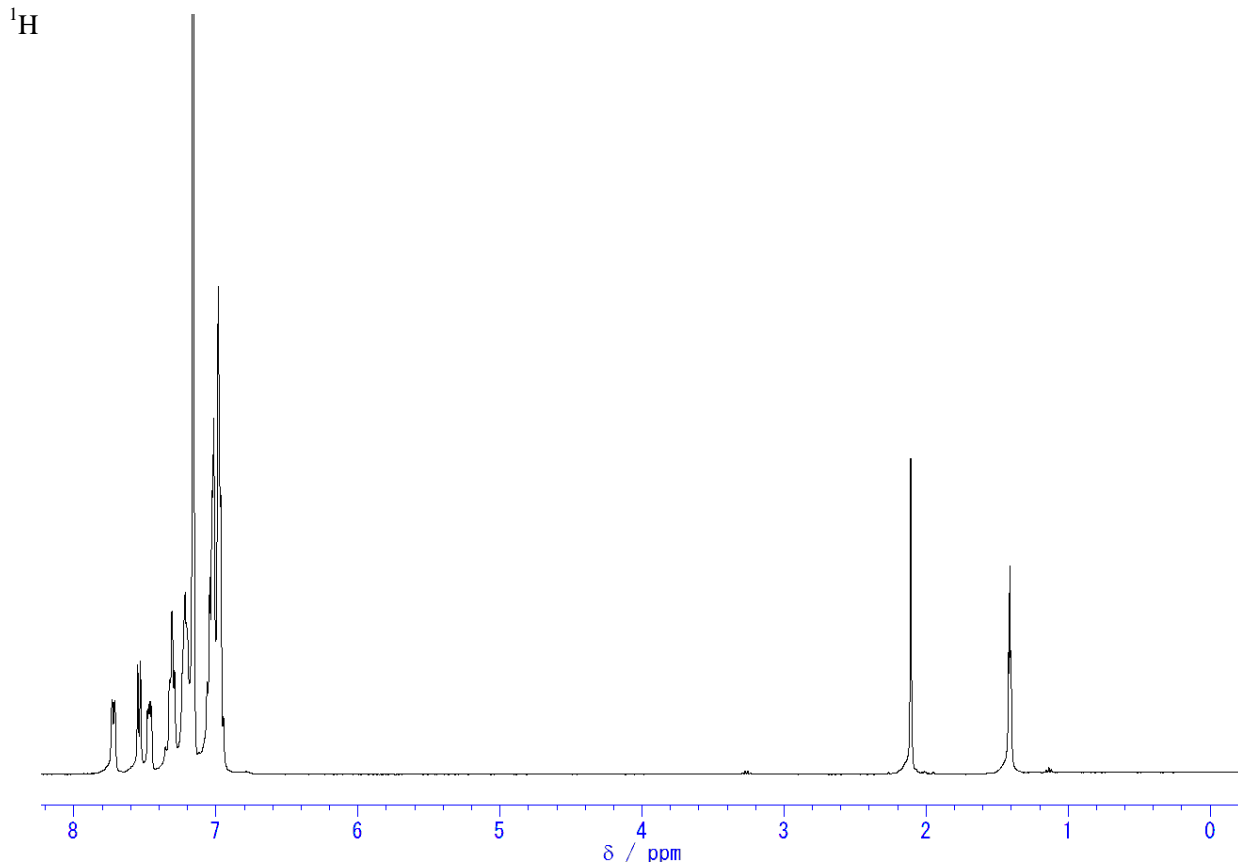

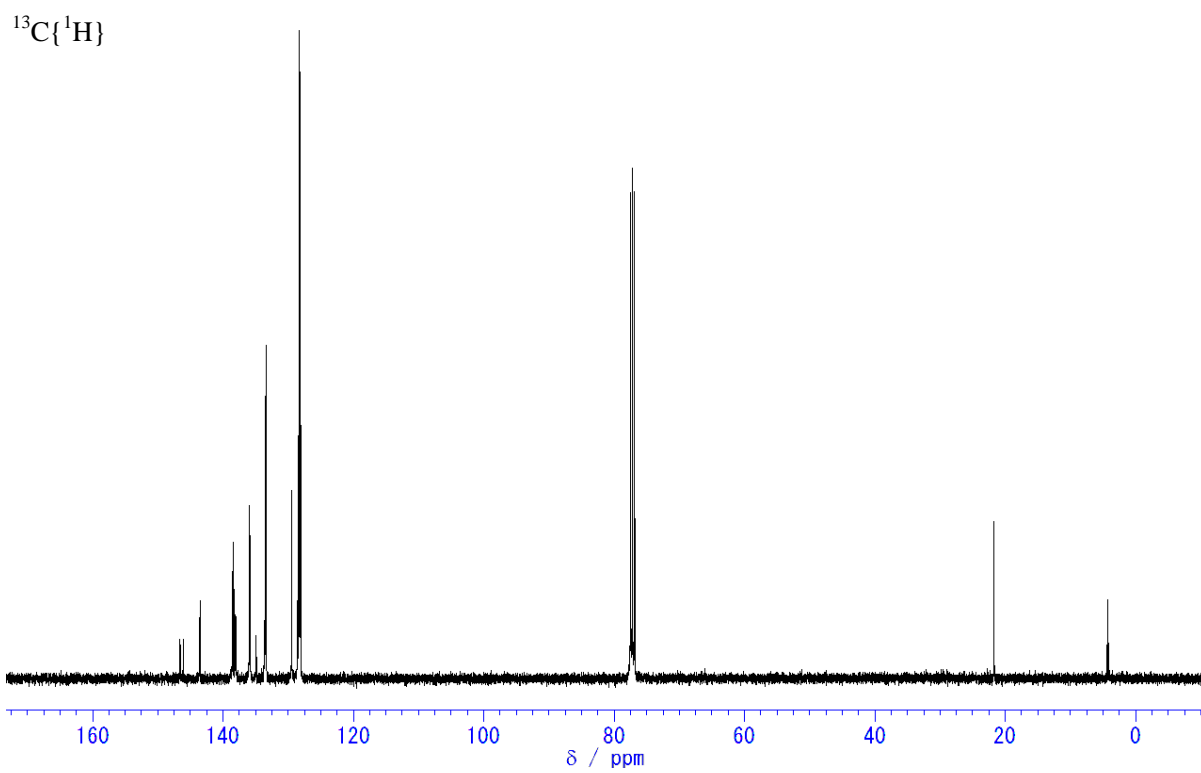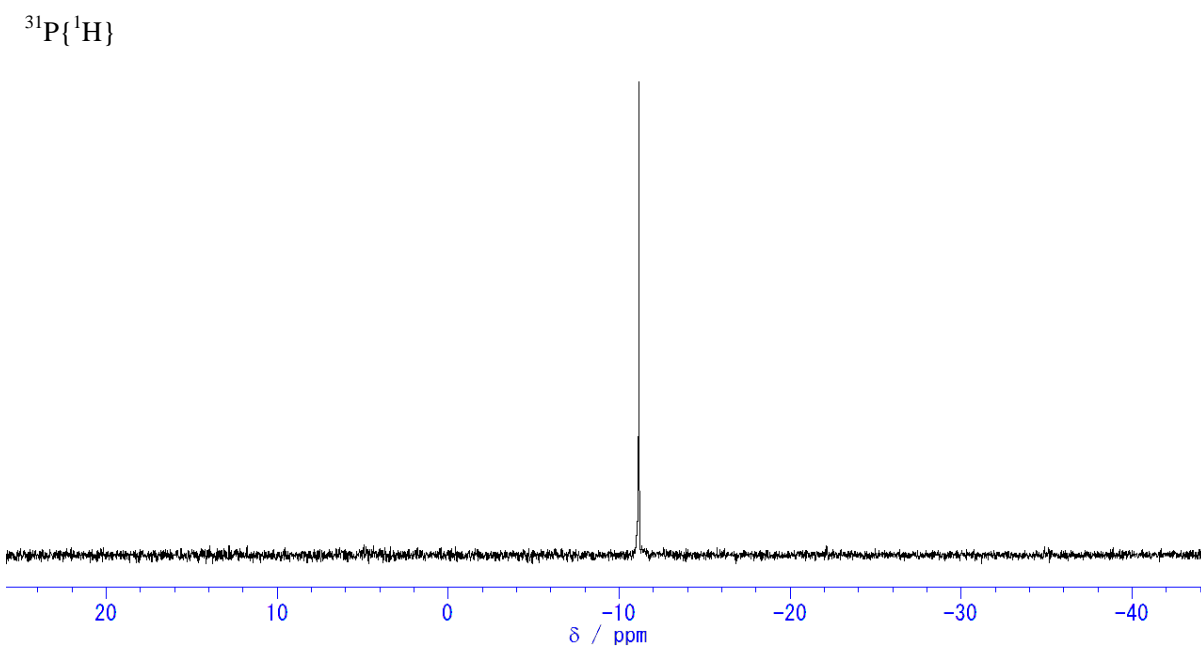

**Figure S21.** NMR spectra of  $\{o\text{-(Ph}_2\text{P)C}_6\text{H}_4\}_2\text{Si(Me)(}p\text{-methoxyphenyl)}$  (**4e**).

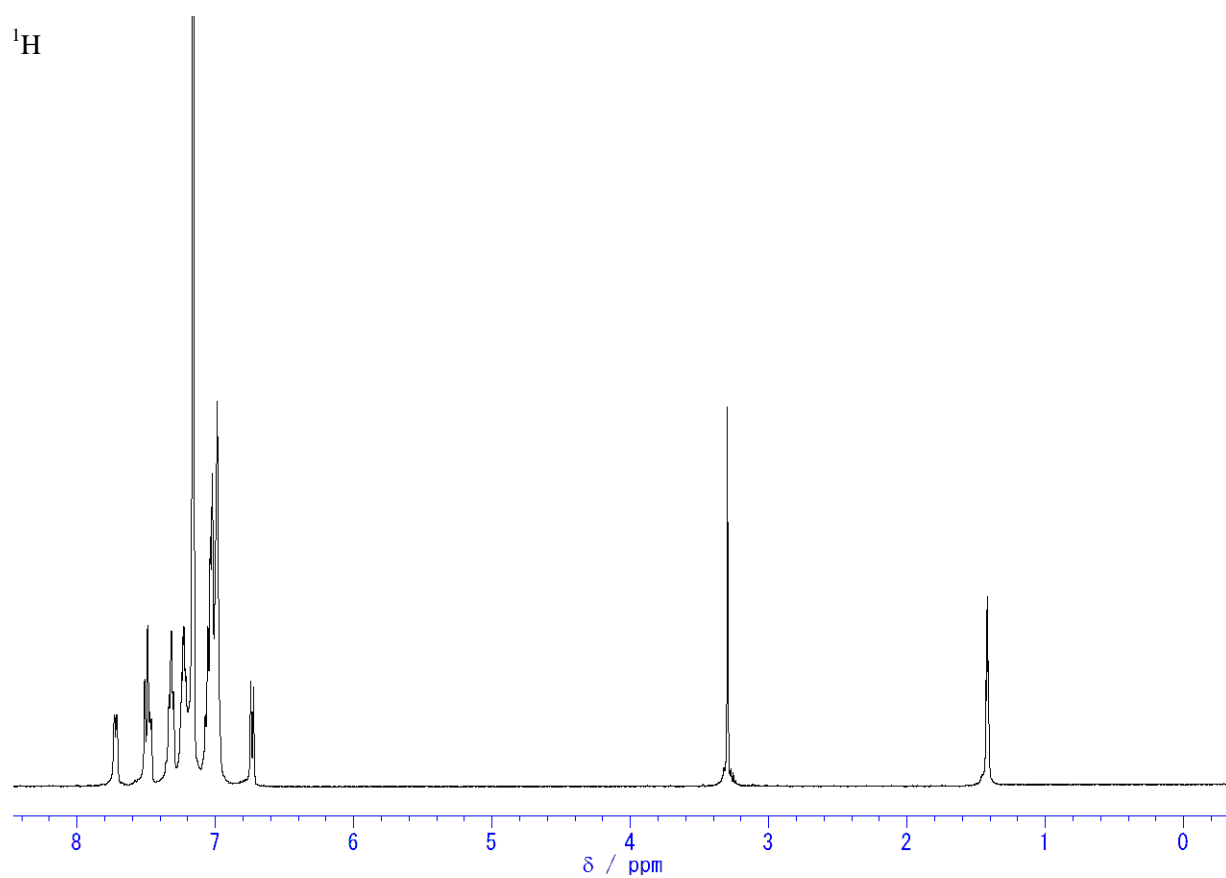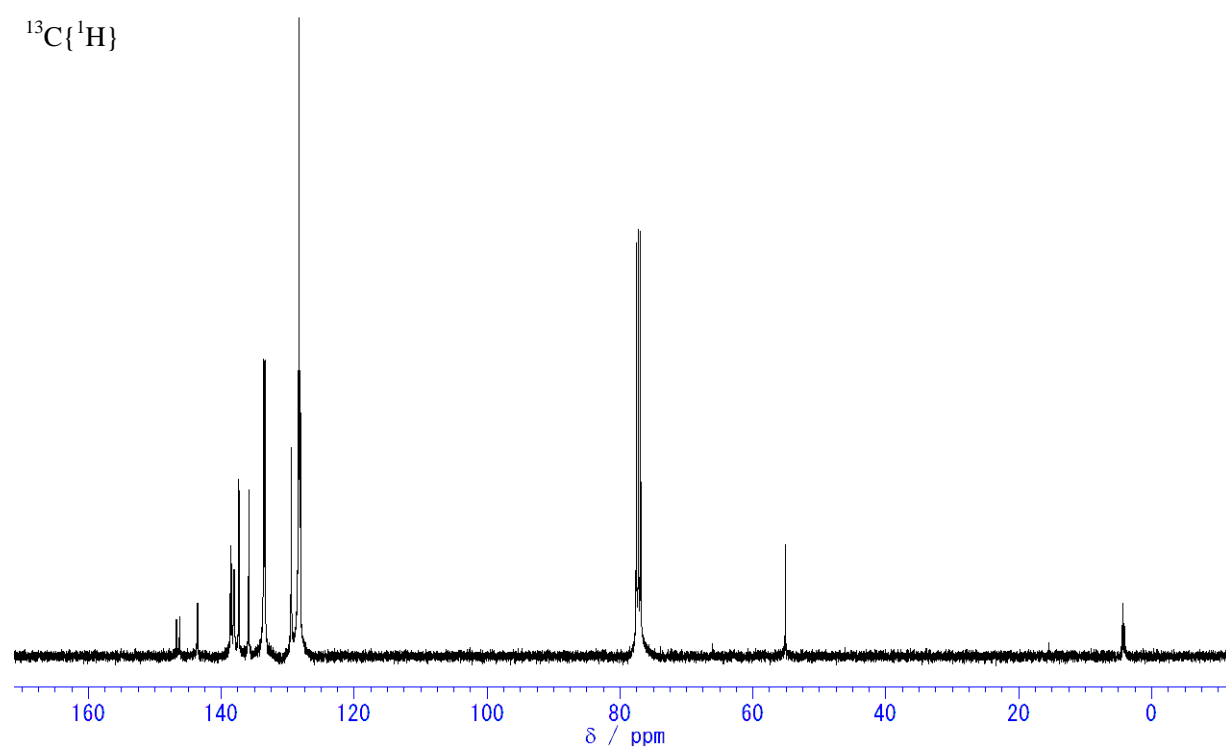

$^{31}\text{P}\{^1\text{H}\}$

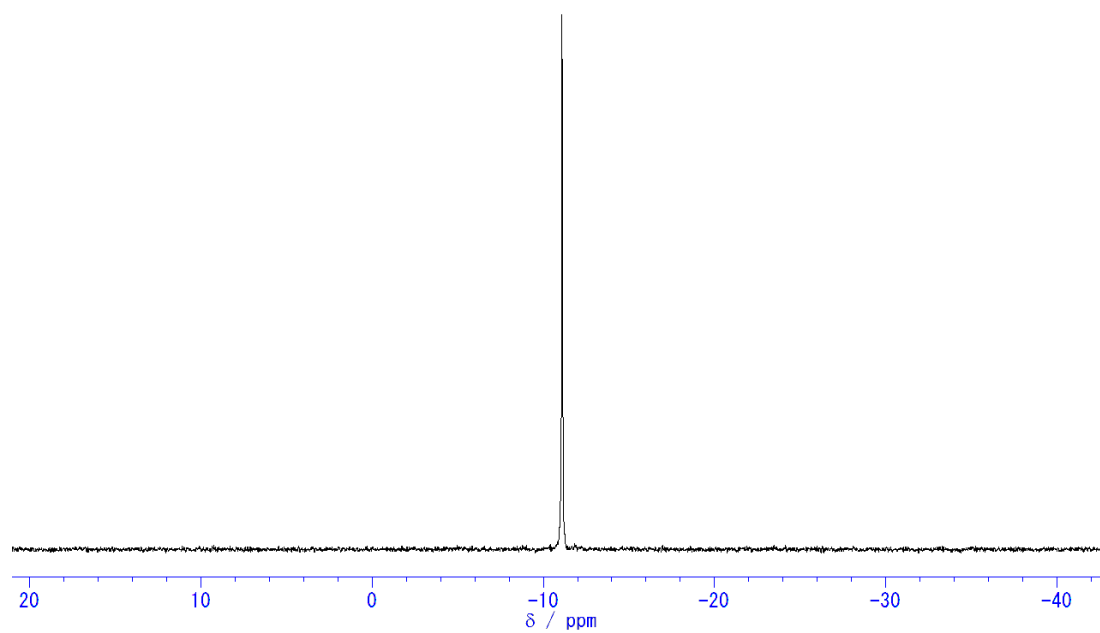

**Figure S22.** NMR spectra of  $\{o\text{-(Ph}_2\text{P)C}_6\text{H}_4\}_2\text{Si(Me)(}p\text{-dimethylaminophenyl)}$  (**4f**).

$^1\text{H}$

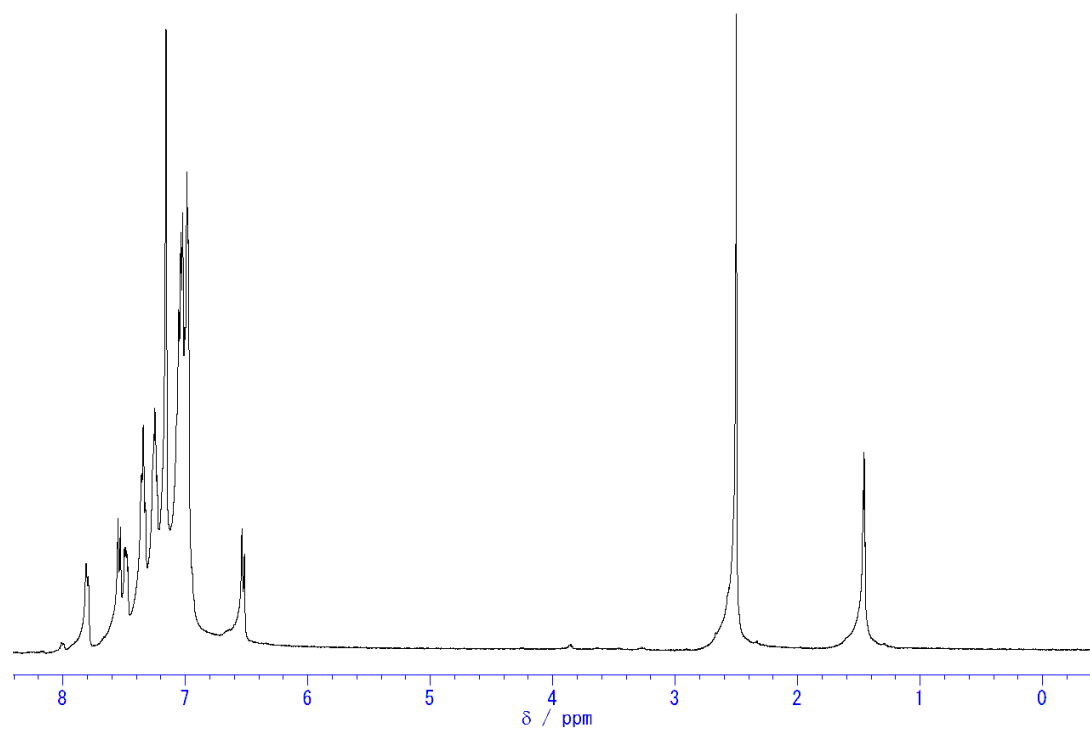

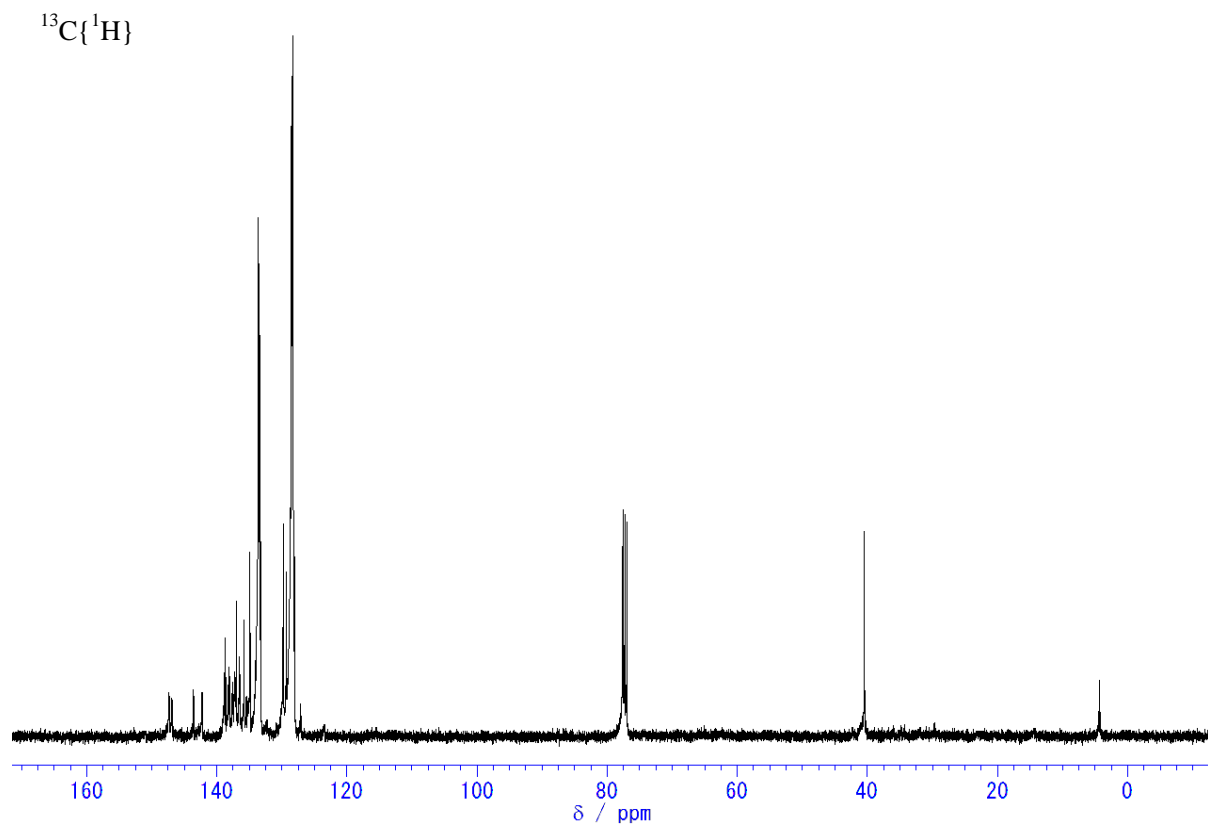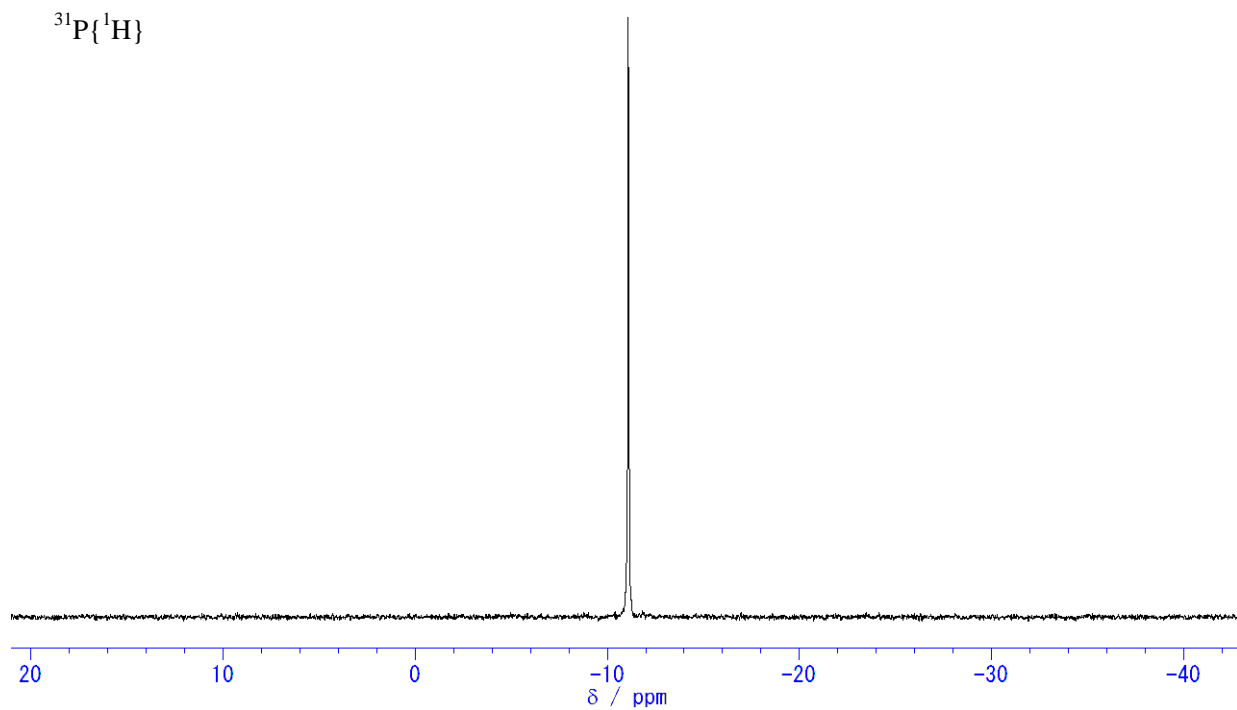



**Figure S23.** NMR spectra of  $\{o\text{-(Ph}_2\text{P)C}_6\text{H}_4\}_2\text{Si(Me)(}p\text{-fluorophenyl)}$  (**4g**).

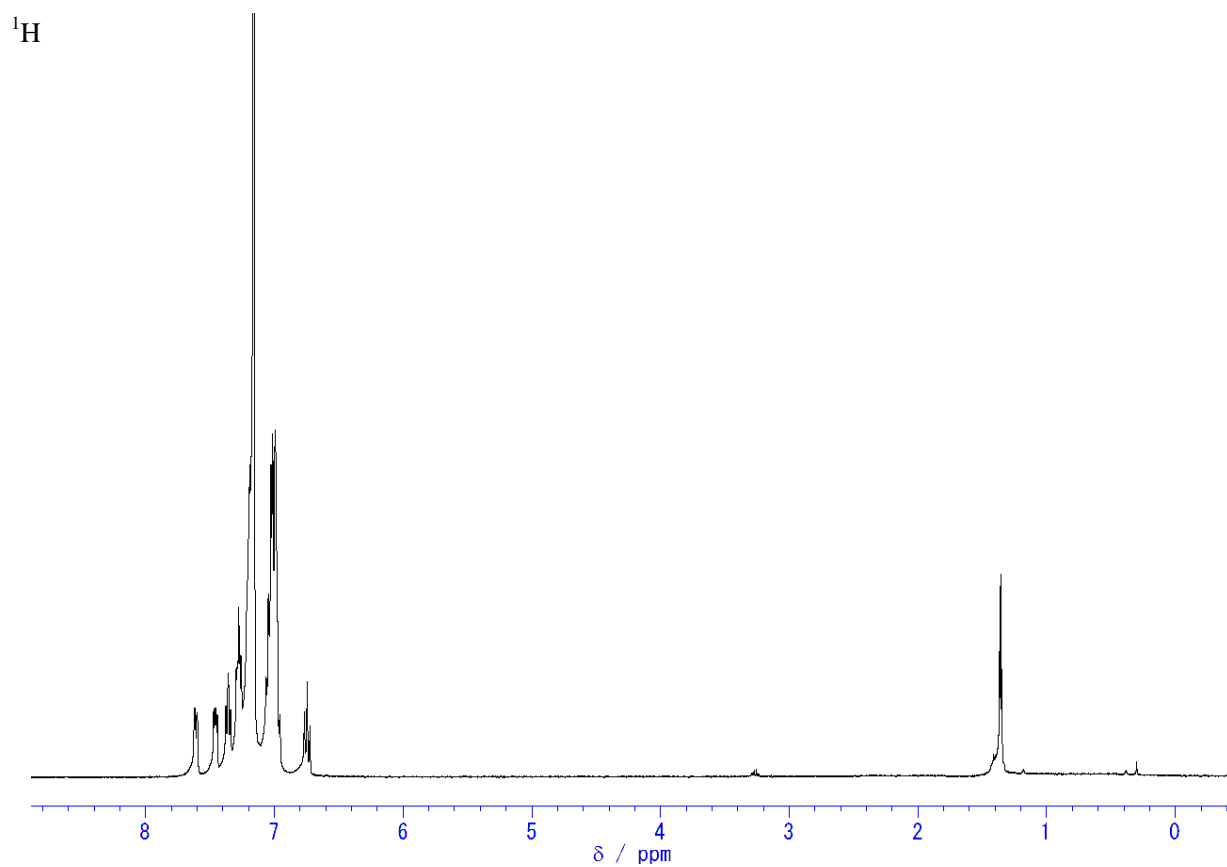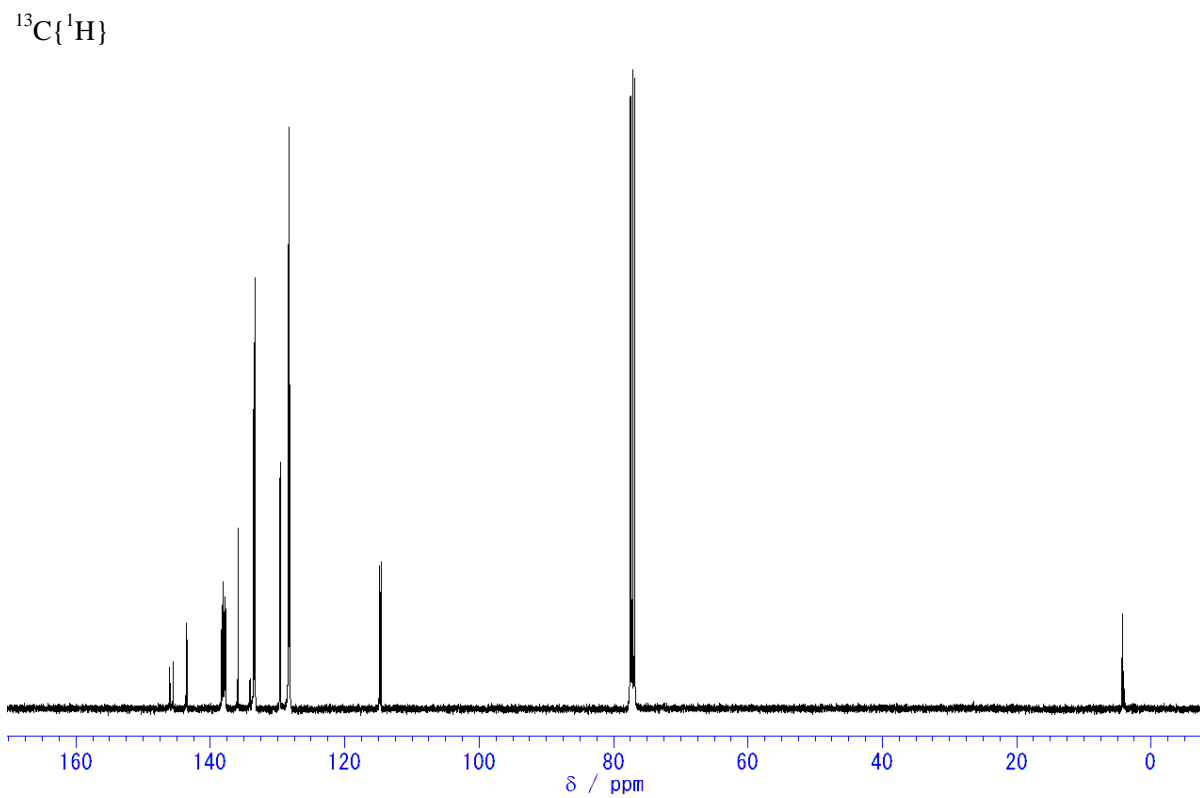

$^{19}\text{F}\{^1\text{H}\}$

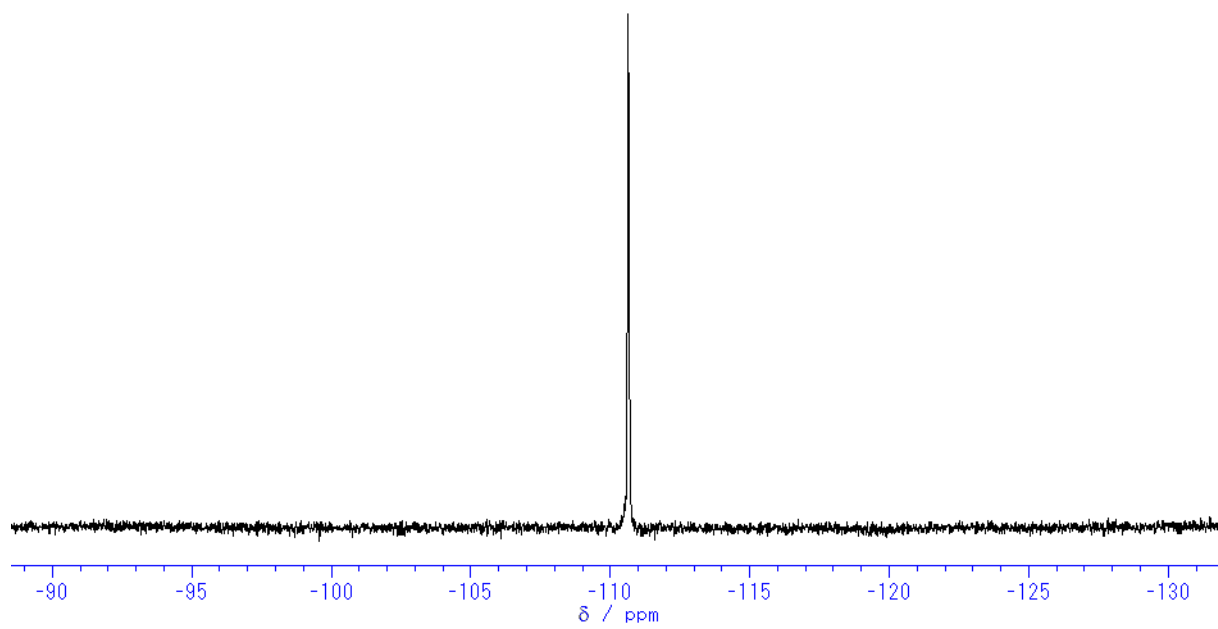

$^{31}\text{P}\{^1\text{H}\}$

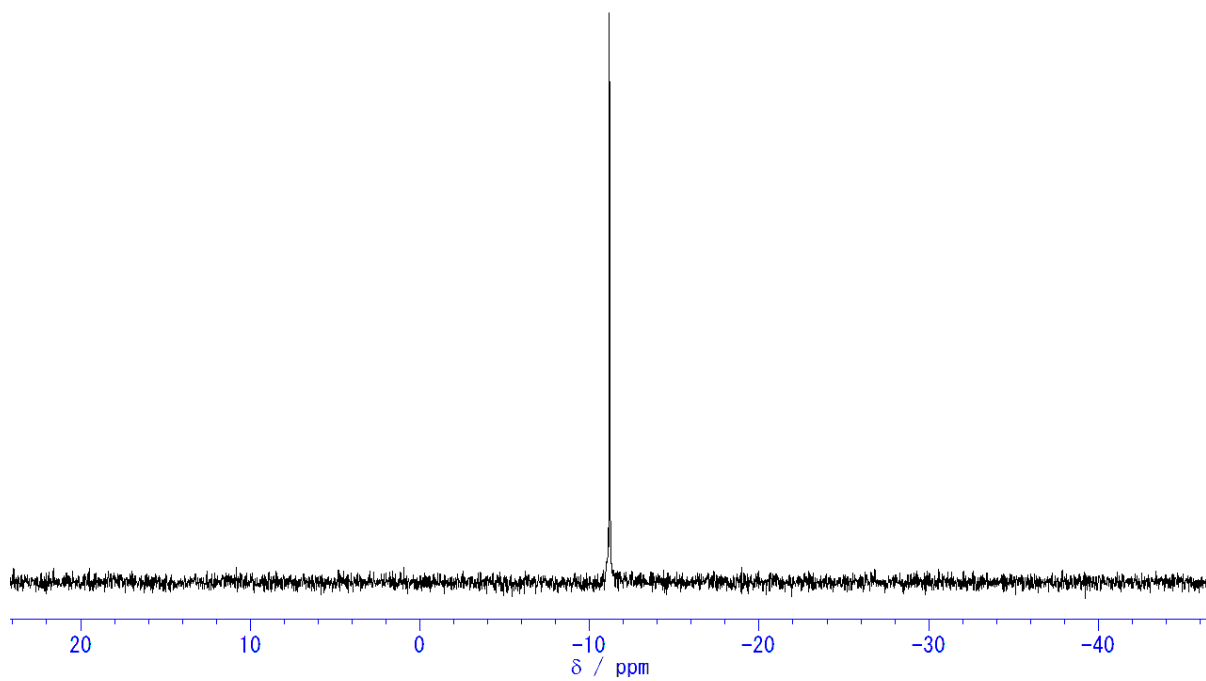

**Figure S24.** NMR spectra of  $\{(o\text{-Ph}_2\text{PC}_6\text{H}_4)_2(\text{Ph})\text{Si}\}\text{Rh}(\text{CO})(\text{PPh}_3)$  (**3a**).

$^1\text{H}$

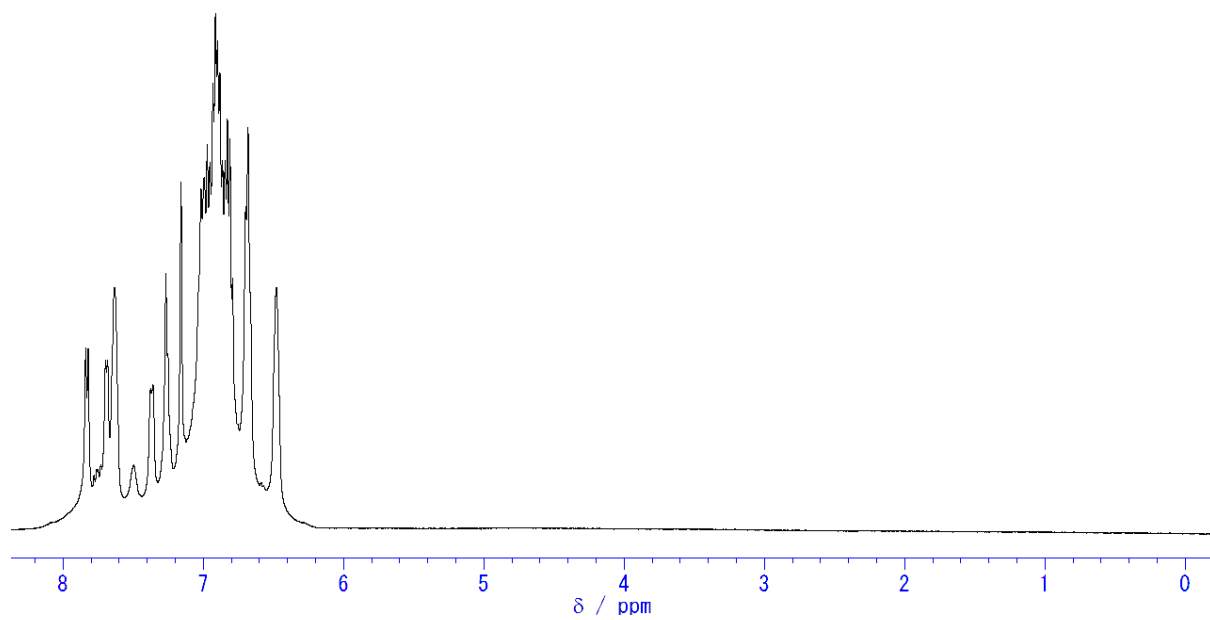

$^{13}\text{C}\{^1\text{H}\}$

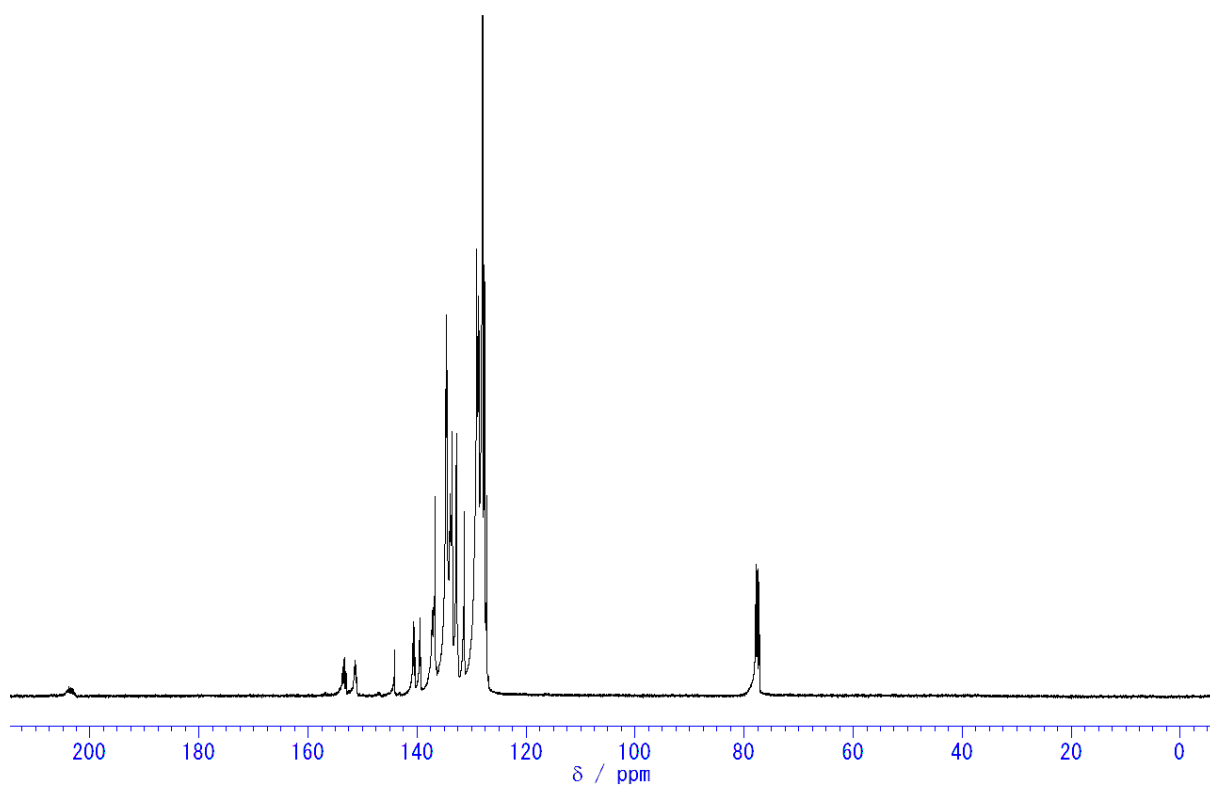

$^{29}\text{Si}$

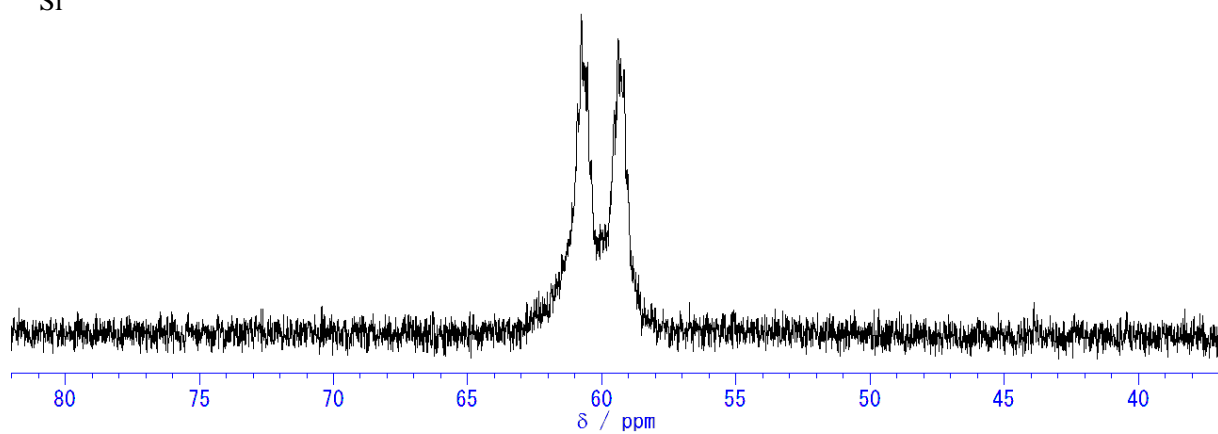

$^{31}\text{P}\{^1\text{H}\}$

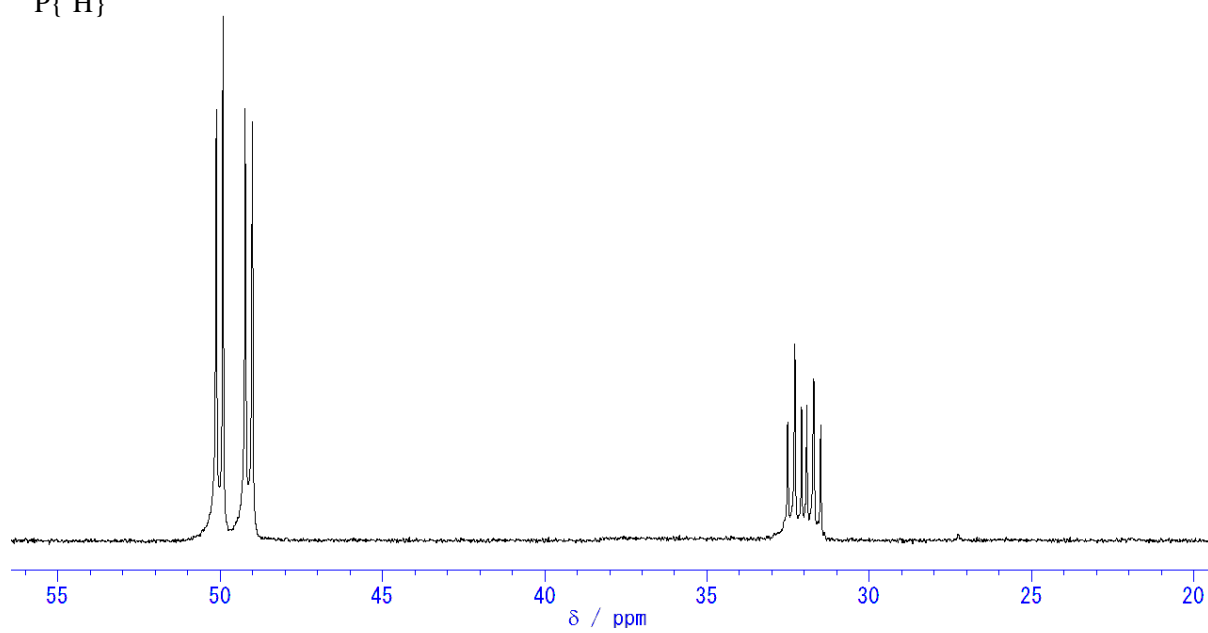

**Figure S25.** NMR spectra of  $\{(o\text{-Ph}_2\text{PC}_6\text{H}_4)_2(\text{Me})\text{Si}\}\text{Rh}(\text{CO})(\text{PPh}_3)$  (**3b**).

$^1\text{H}$

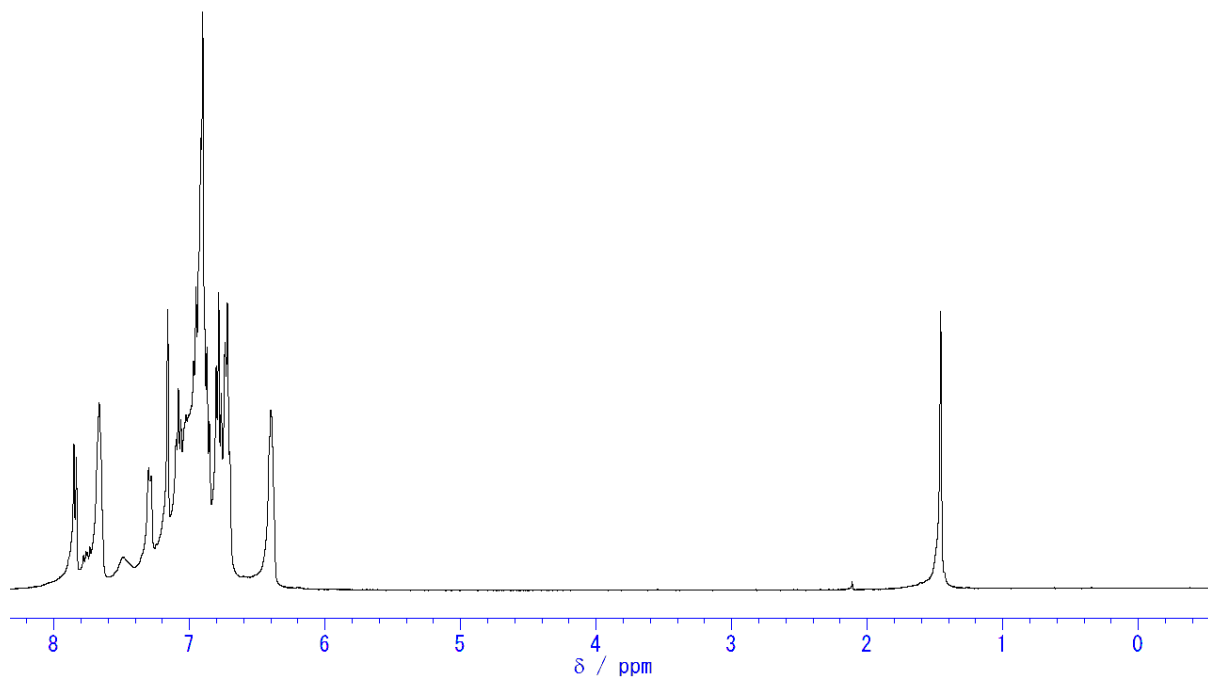

$^{13}\text{C}\{^1\text{H}\}$

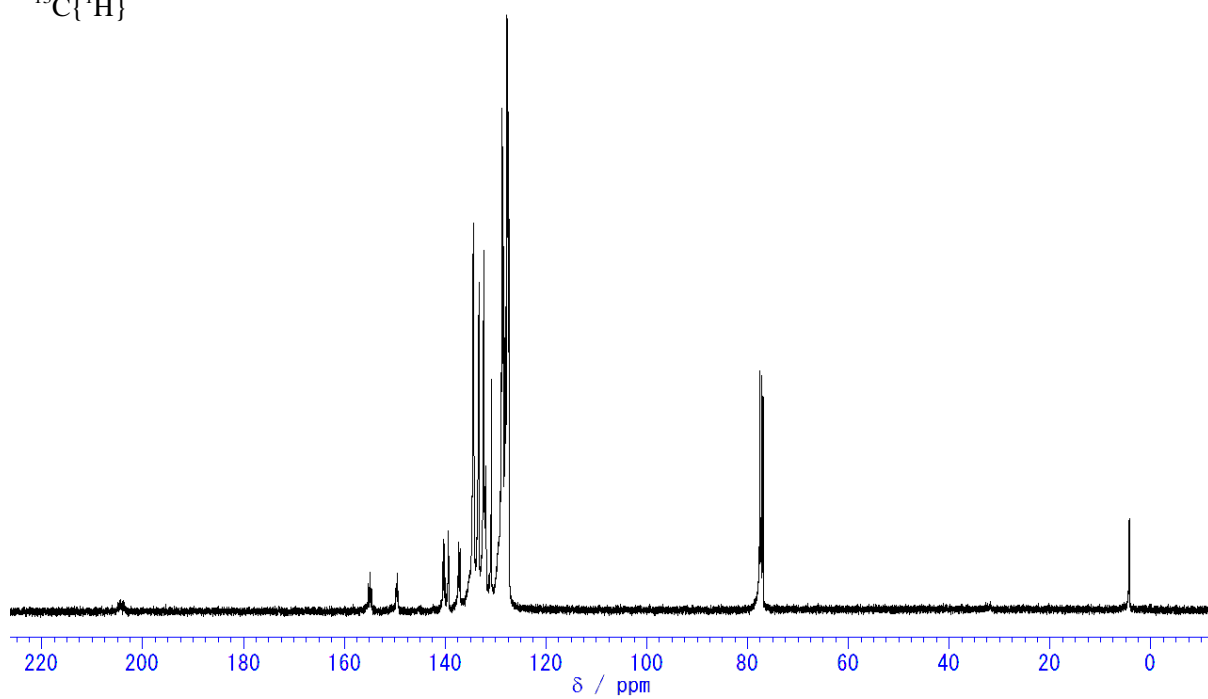

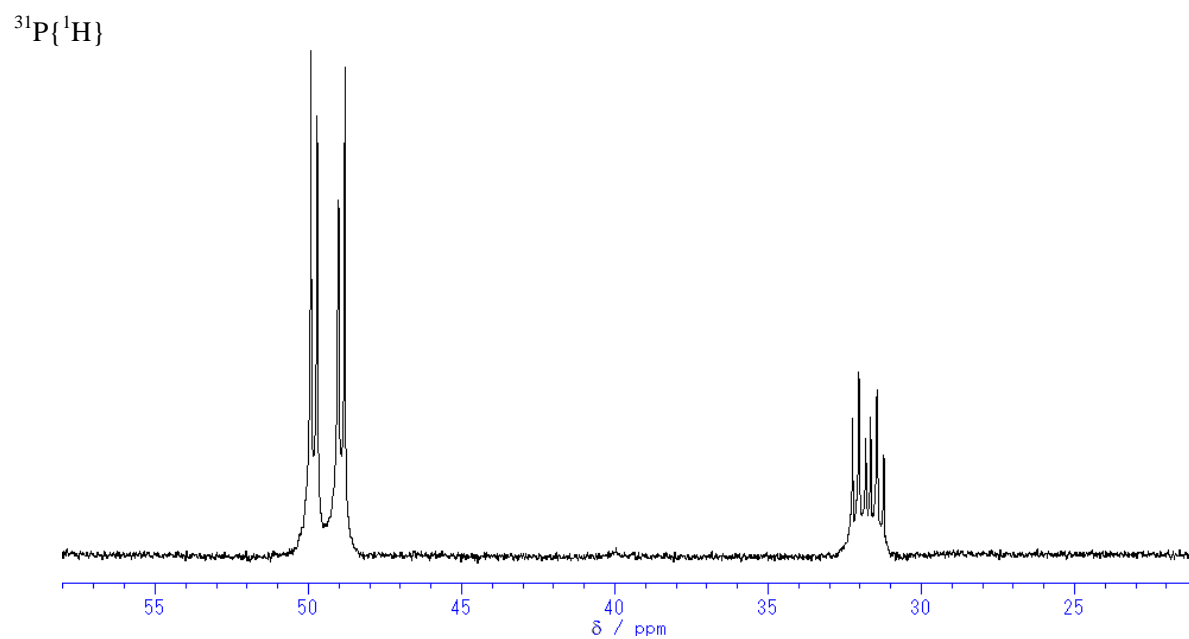

**Figure S26.** NMR spectra of  $\{(o\text{-Ph}_2\text{PC}_6\text{H}_4)_2(\text{Et})\text{Si}\}\text{Rh}(\text{CO})(\text{PPh}_3)$  (**3c**).

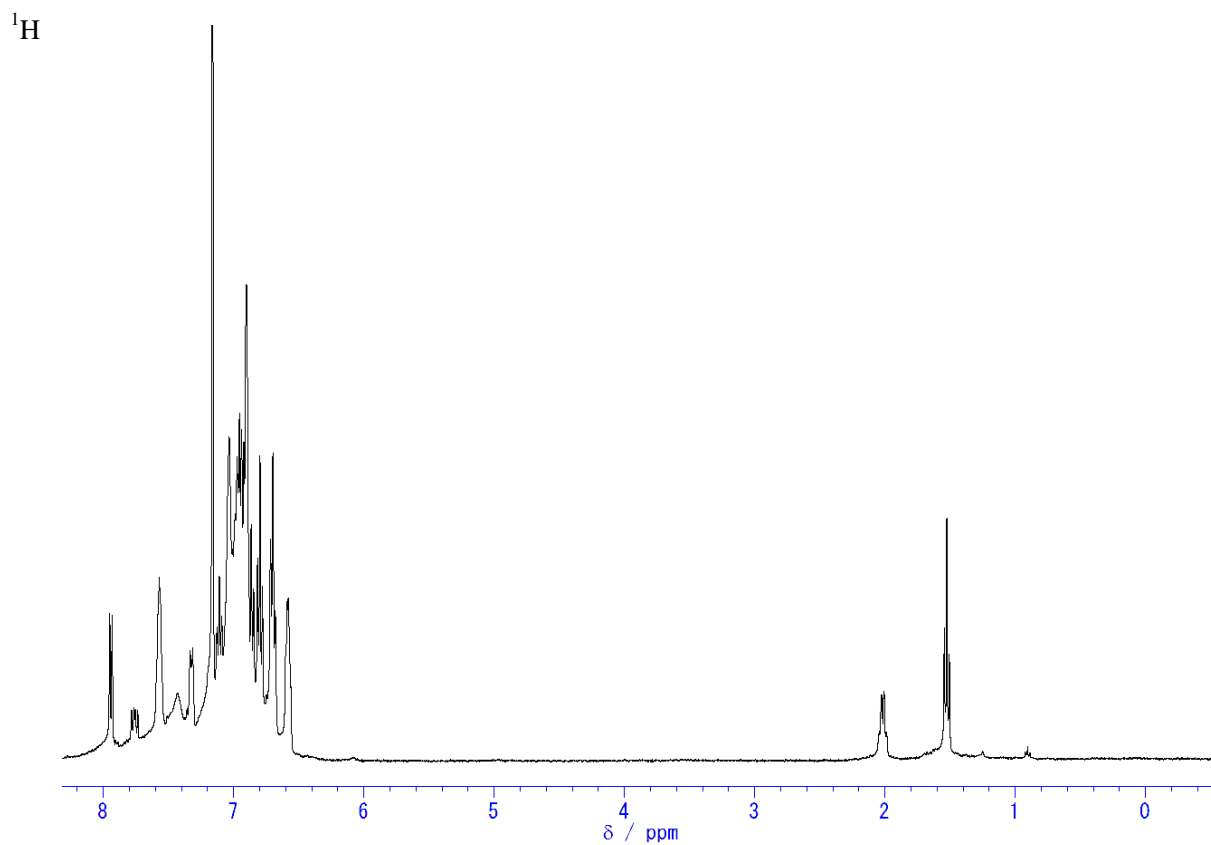

$^{13}\text{C}\{^1\text{H}\}$

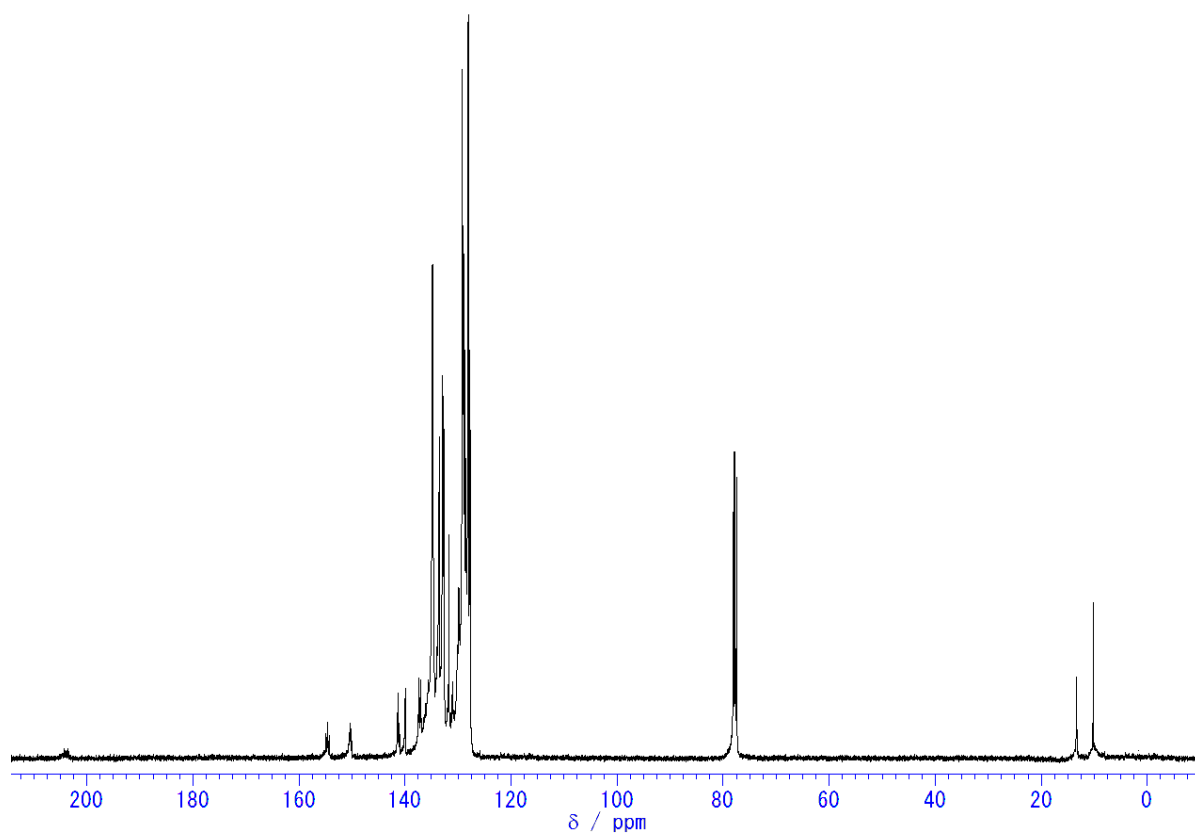

$^{29}\text{Si}\{^1\text{H}\}$

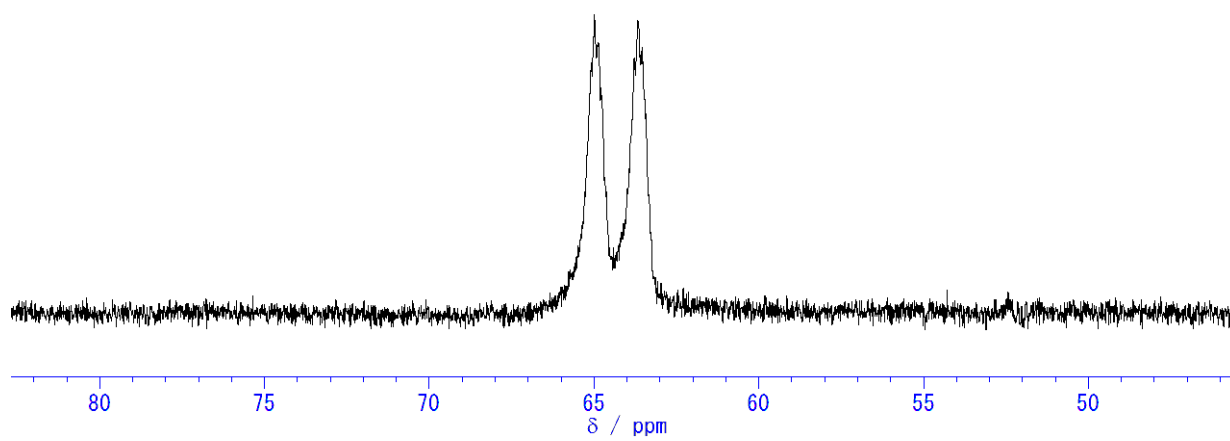



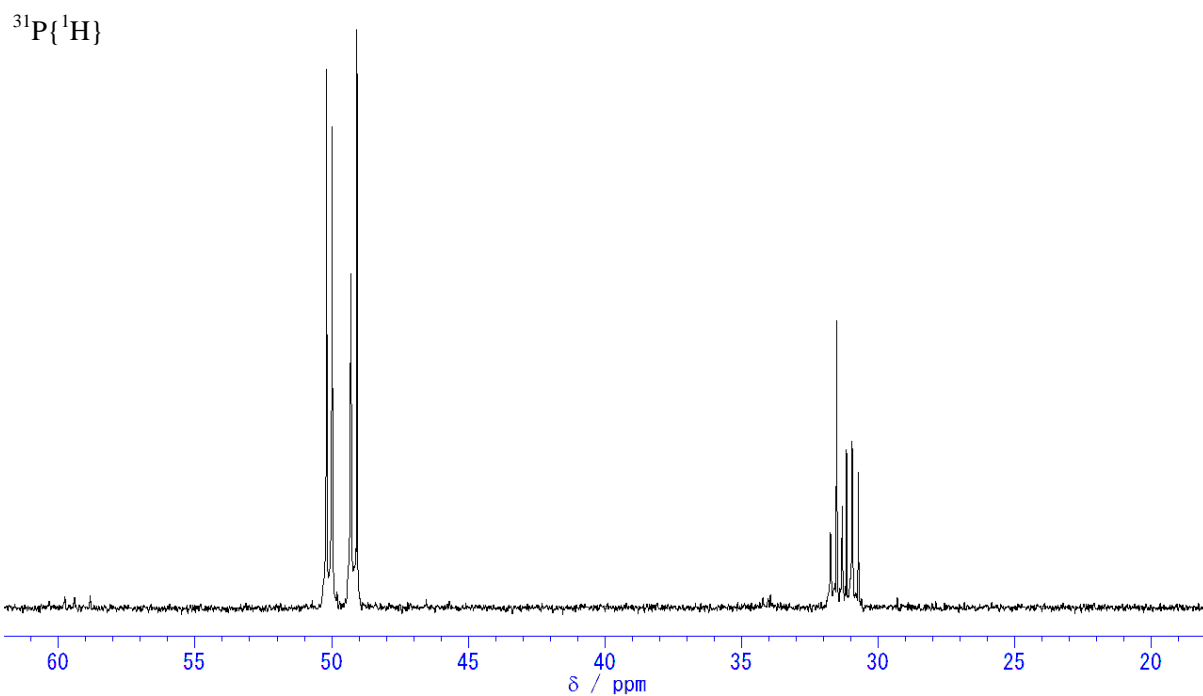

**Figure S27.** NMR spectra of  $\{(o\text{-Ph}_2\text{PC}_6\text{H}_4)_2(p\text{-tolyl})\text{Si}\}\text{Rh}(\text{CO})(\text{PPh}_3)$  (**3d**).

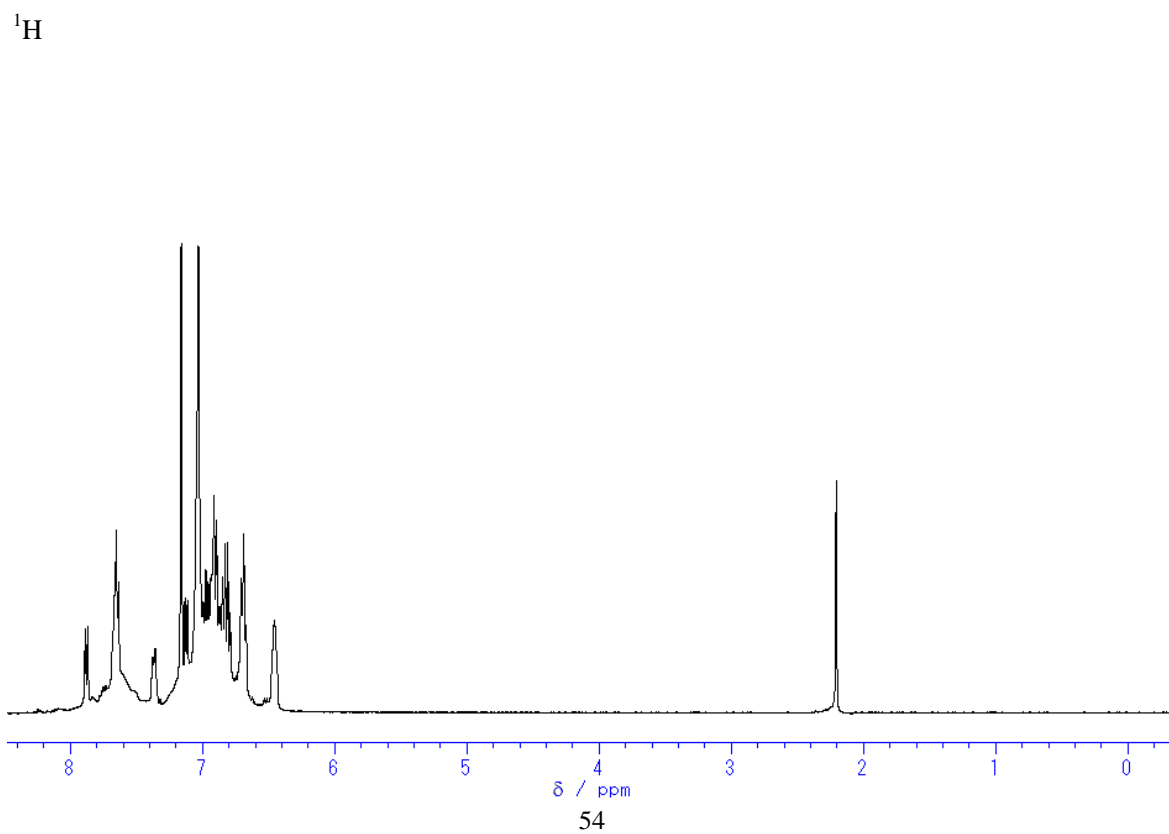

$^{13}\text{C}\{^1\text{H}\}$

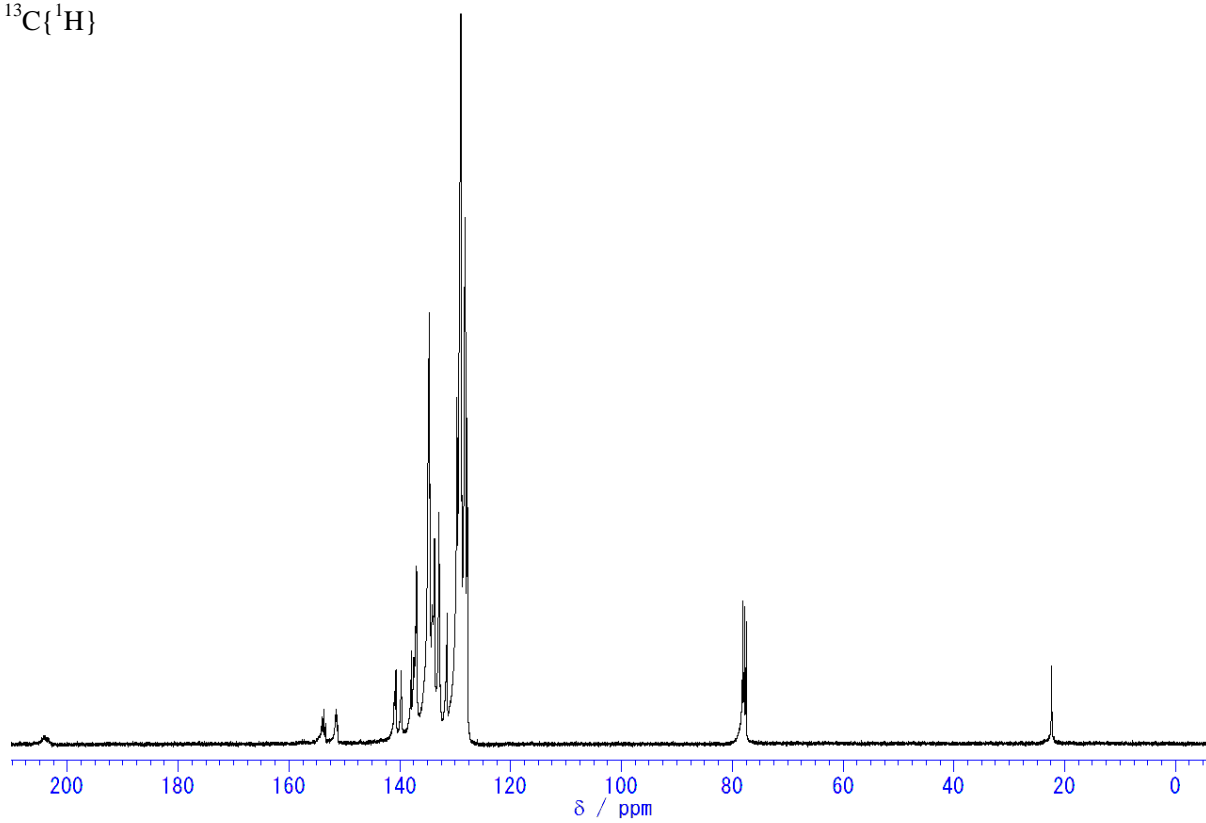

$^{31}\text{P}\{^1\text{H}\}$

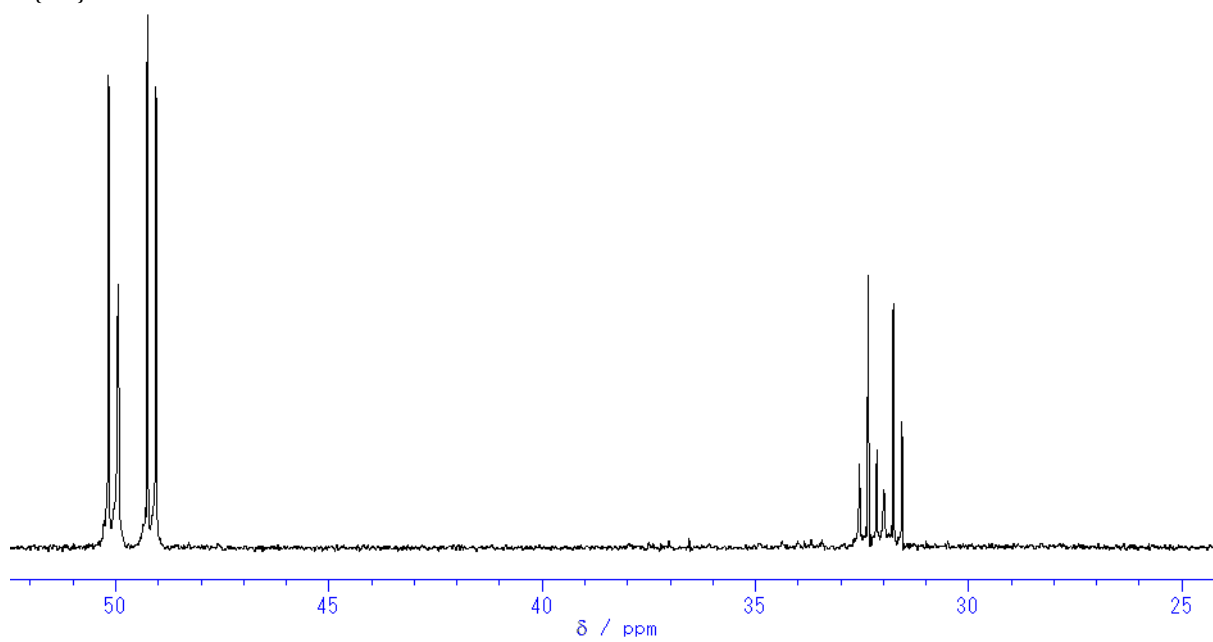

**Figure S28.** NMR spectra of  $\{(o\text{-Ph}_2\text{PC}_6\text{H}_4)_2(p\text{-methoxyphenyl})\text{Si}\}\text{Rh}(\text{CO})(\text{PPh}_3)$  (**3e**).

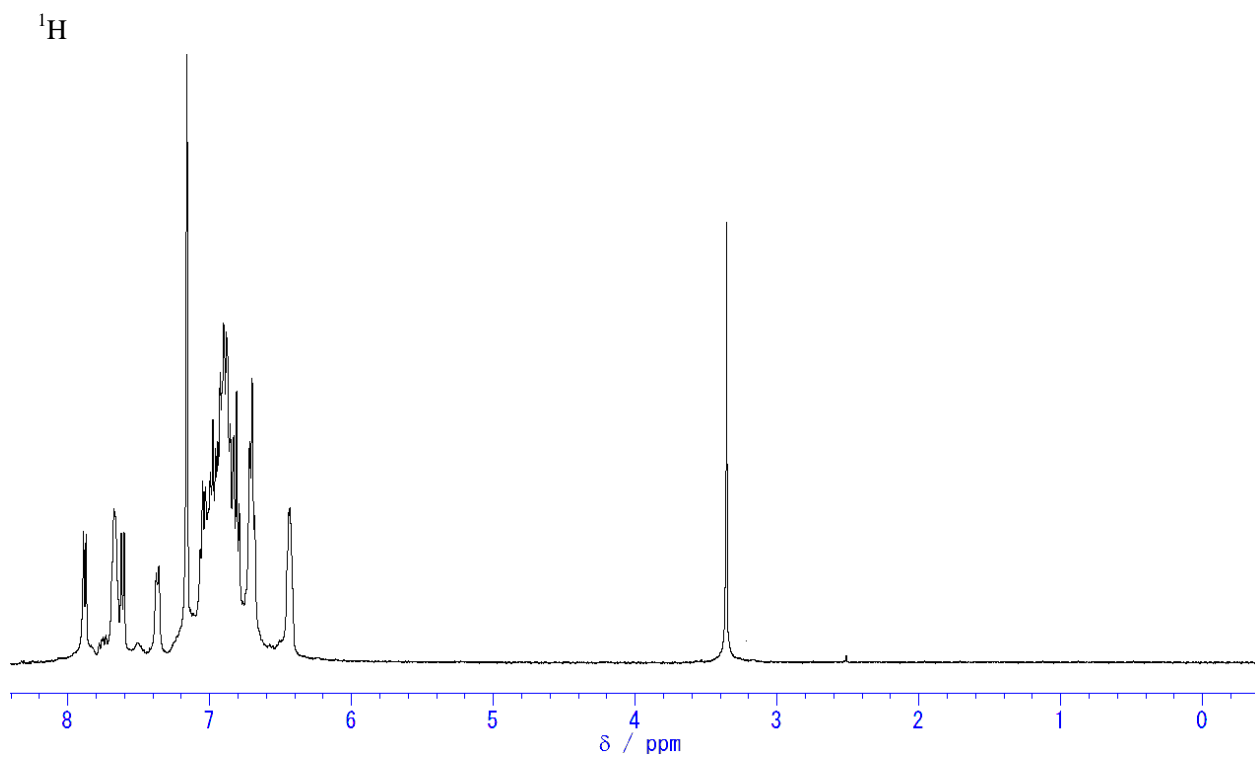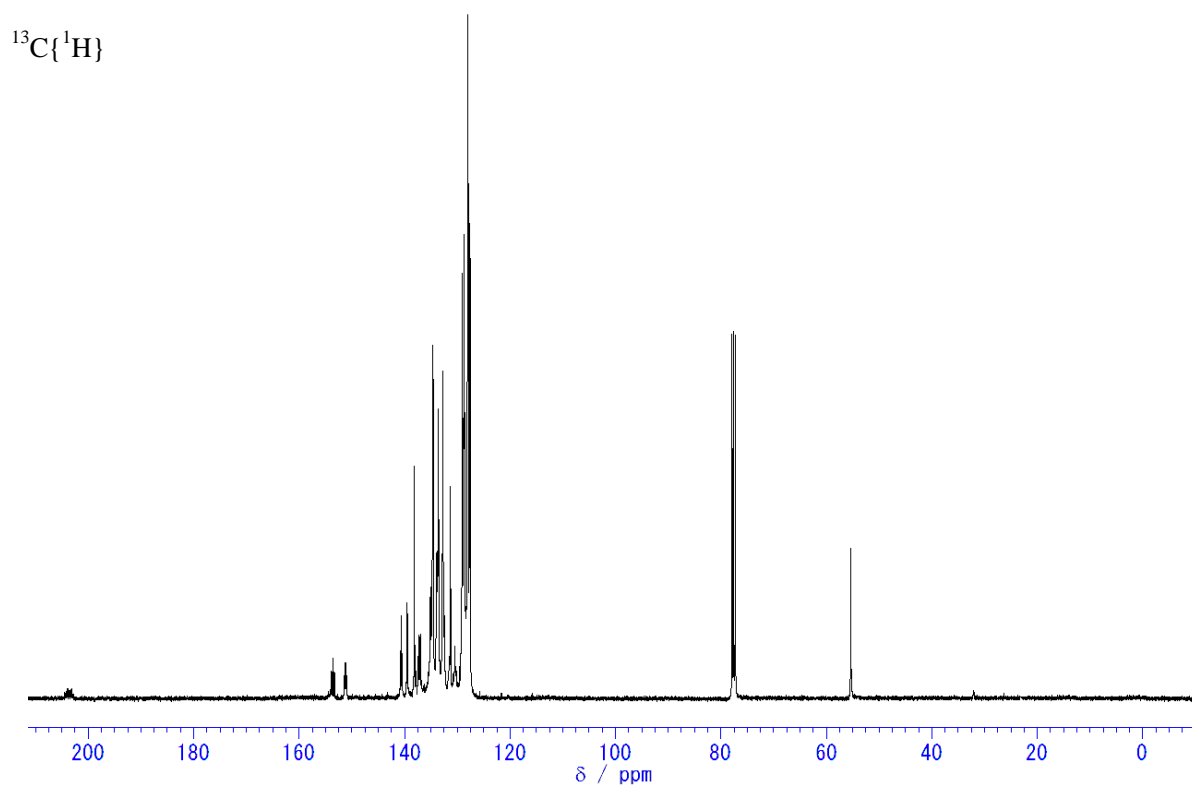

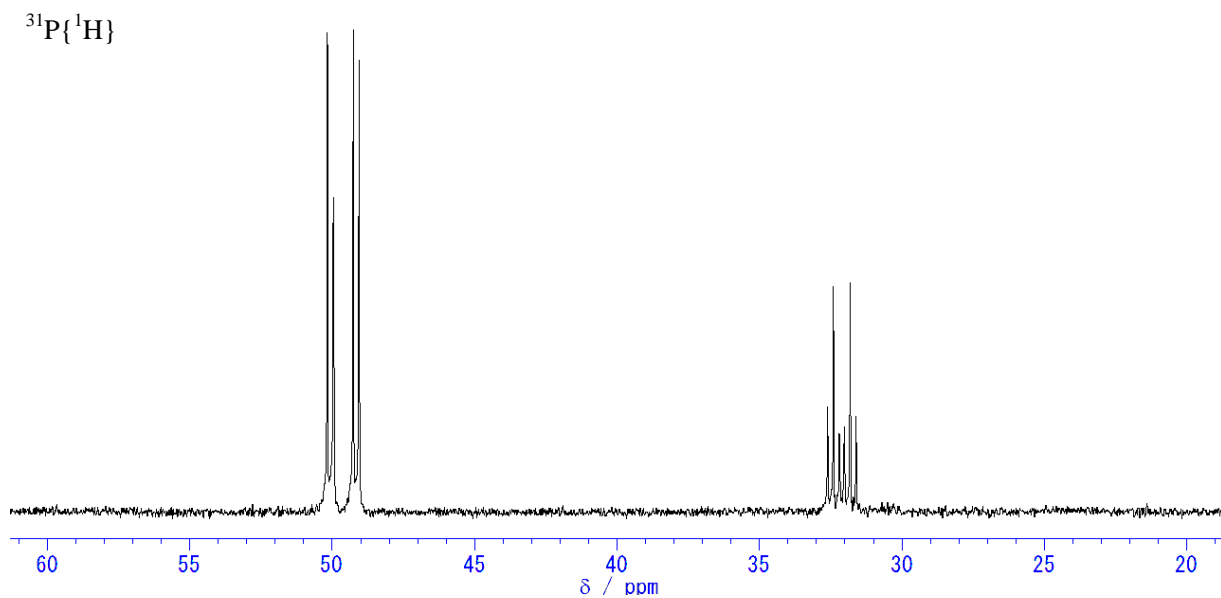

**Figure S29.** NMR spectra of  $\{(o\text{-Ph}_2\text{PC}_6\text{H}_4)_2(p\text{-dimethylaminophenyl})\text{Si}\}\text{Rh}(\text{CO})(\text{PPh}_3)$  (**3f**).

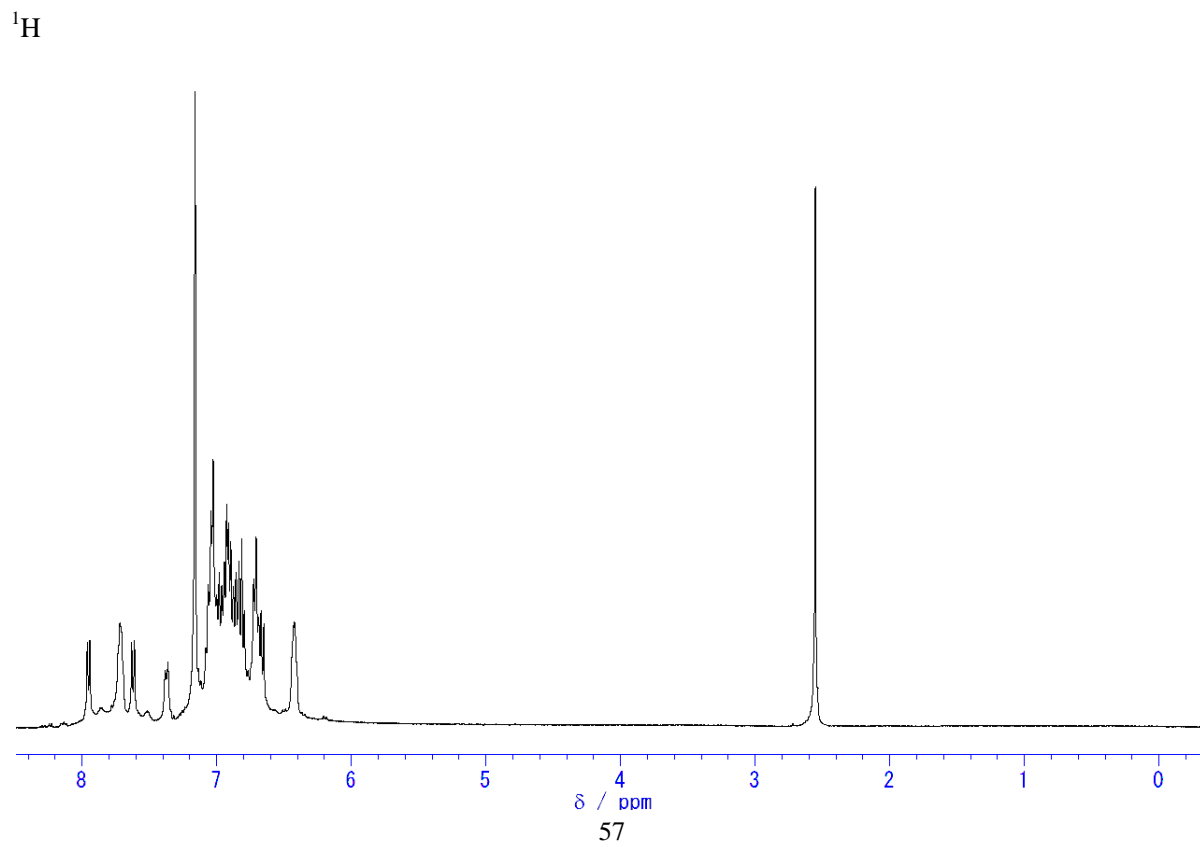

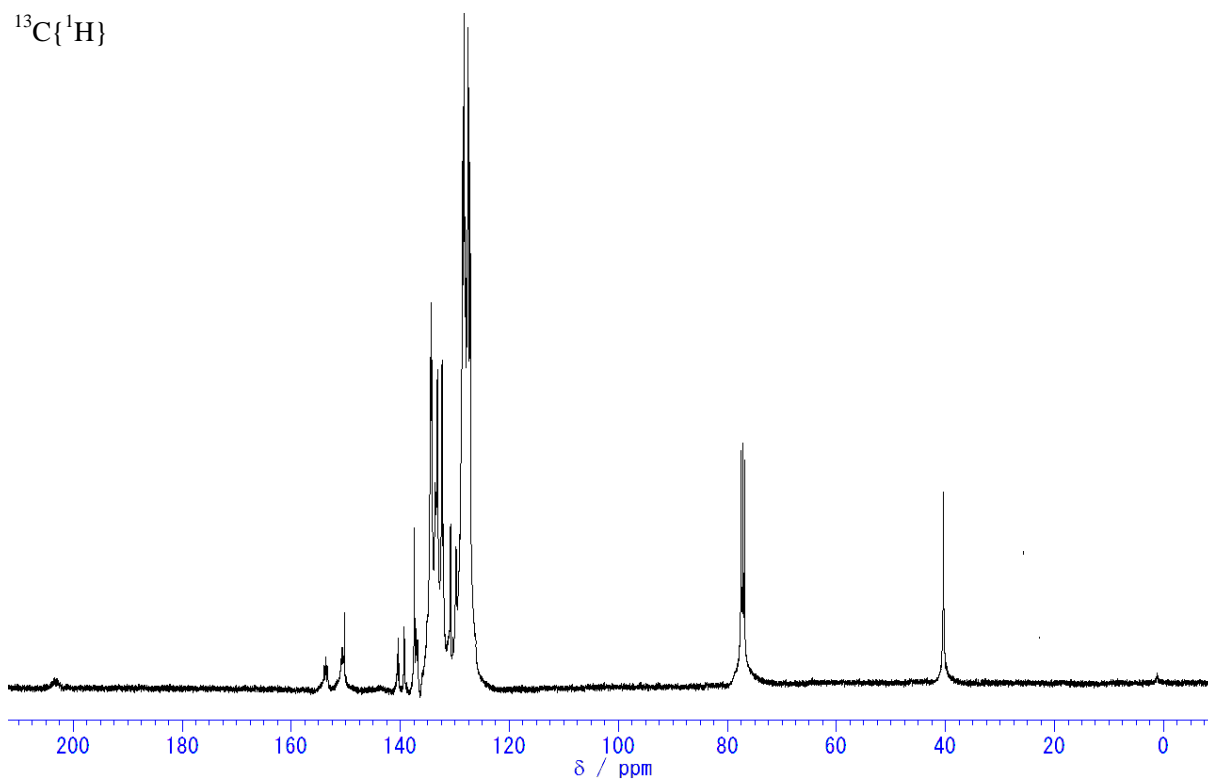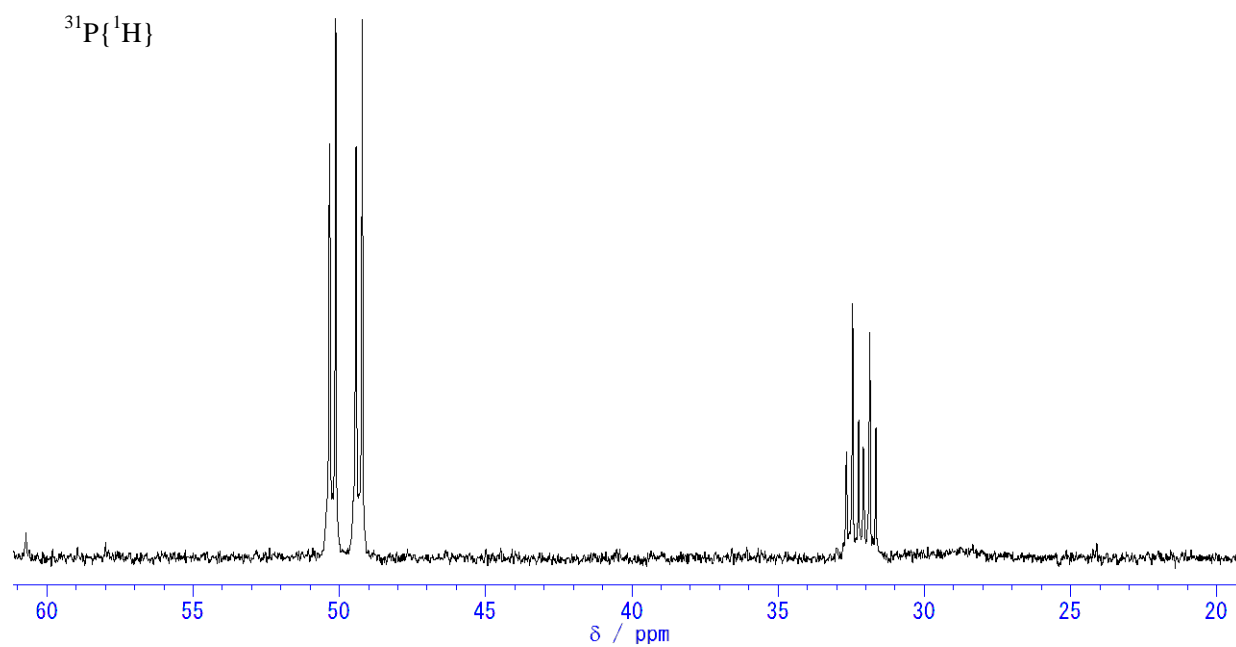

**Figure S30.** NMR spectra of  $\{(o\text{-Ph}_2\text{PC}_6\text{H}_4)_2(p\text{-fluorophenyl})\text{Si}\}\text{Rh}(\text{CO})(\text{PPh}_3)$  (**3g**).

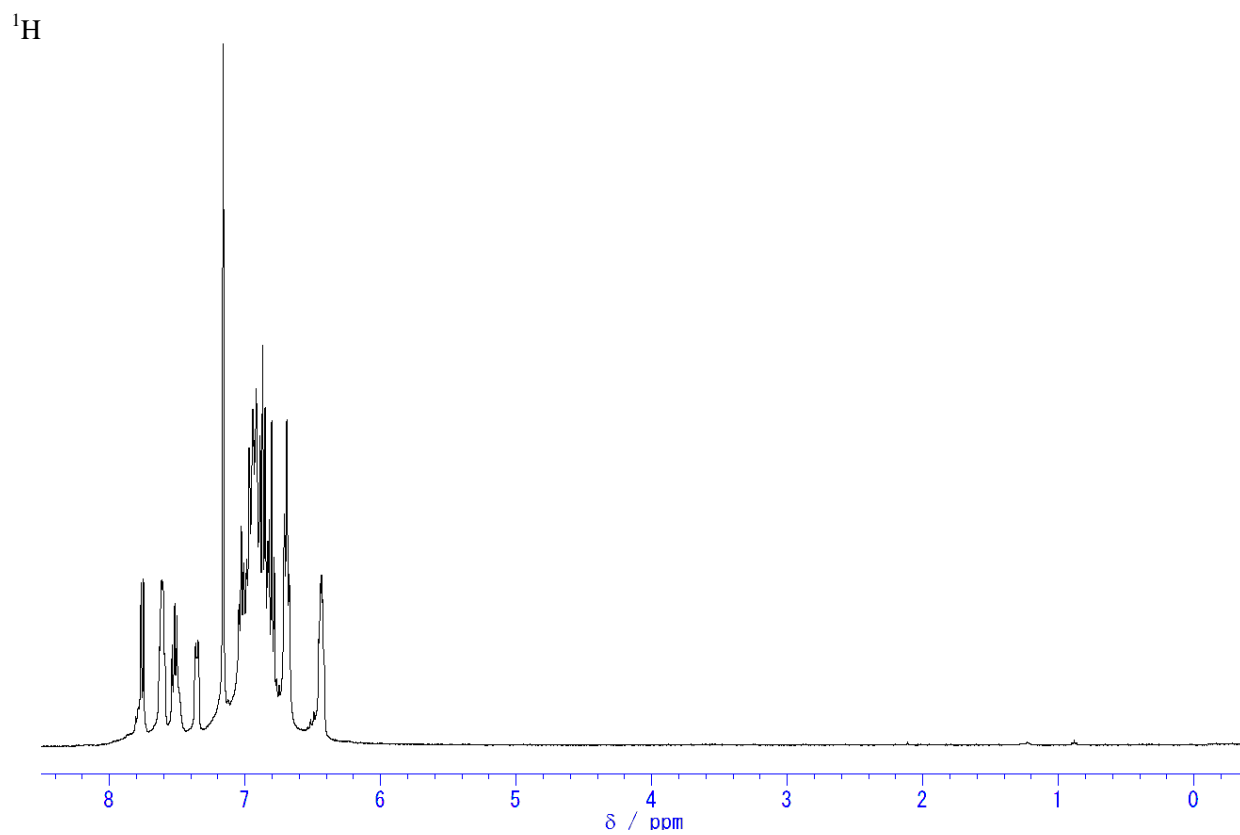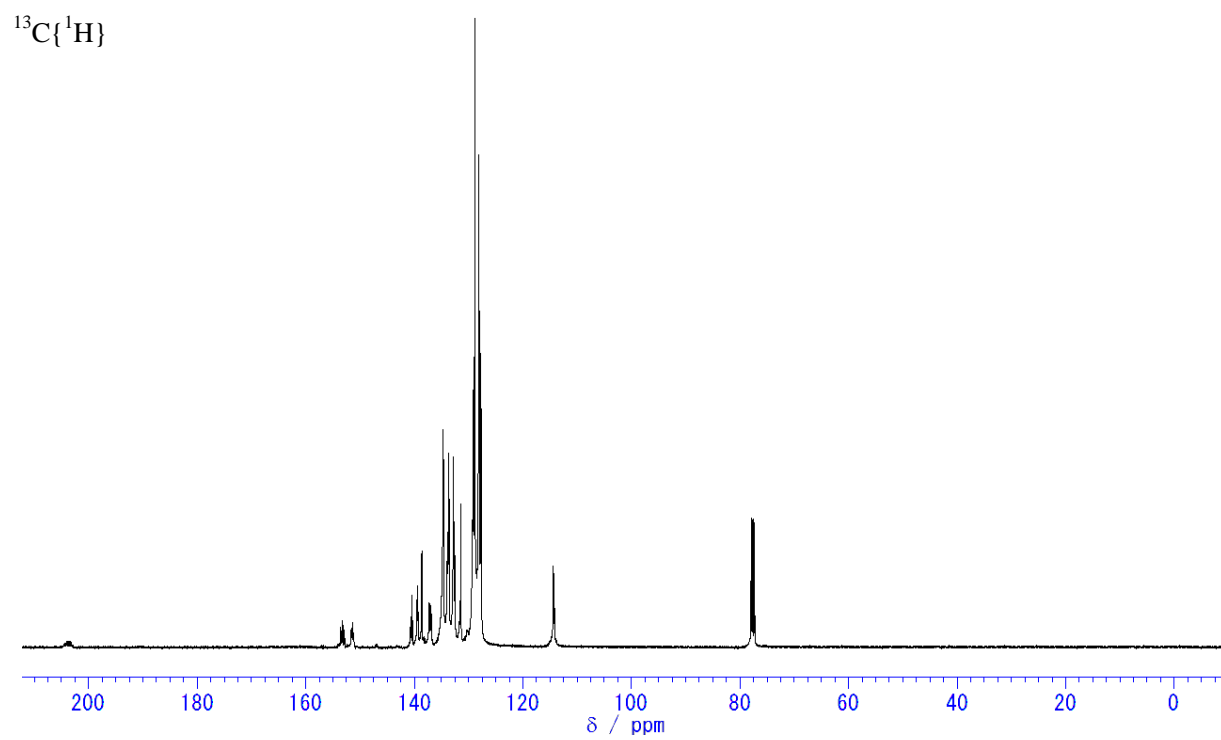

$^{19}\text{F}\{^1\text{H}\}$

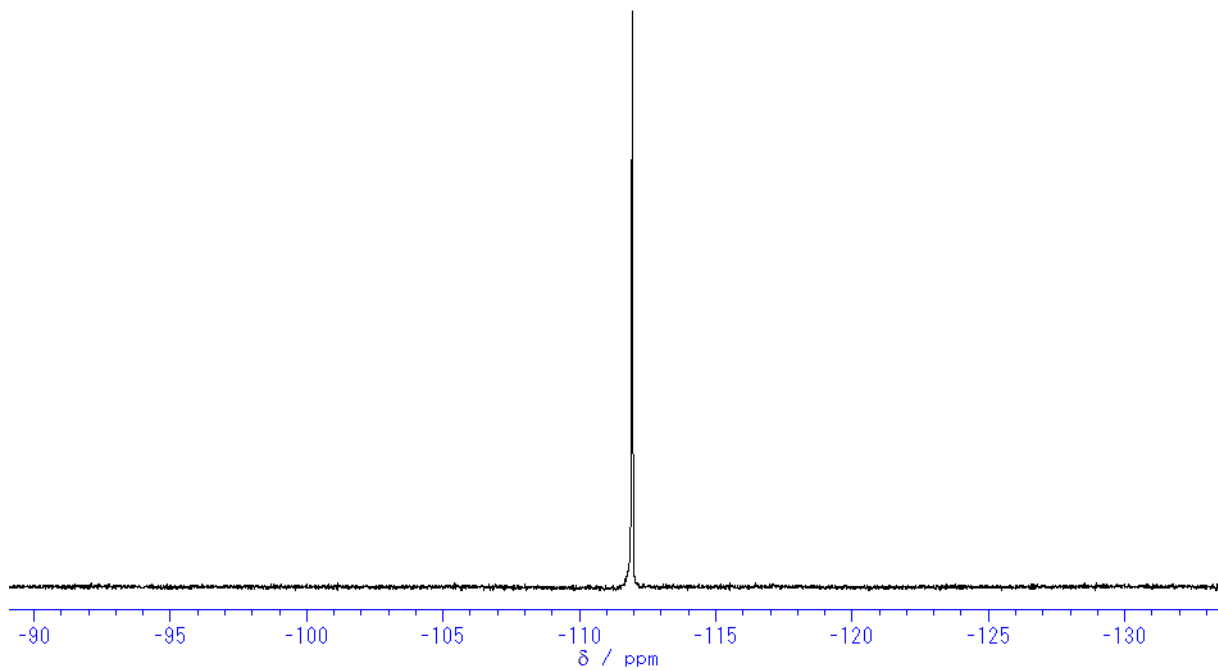

$^{31}\text{P}\{^1\text{H}\}$

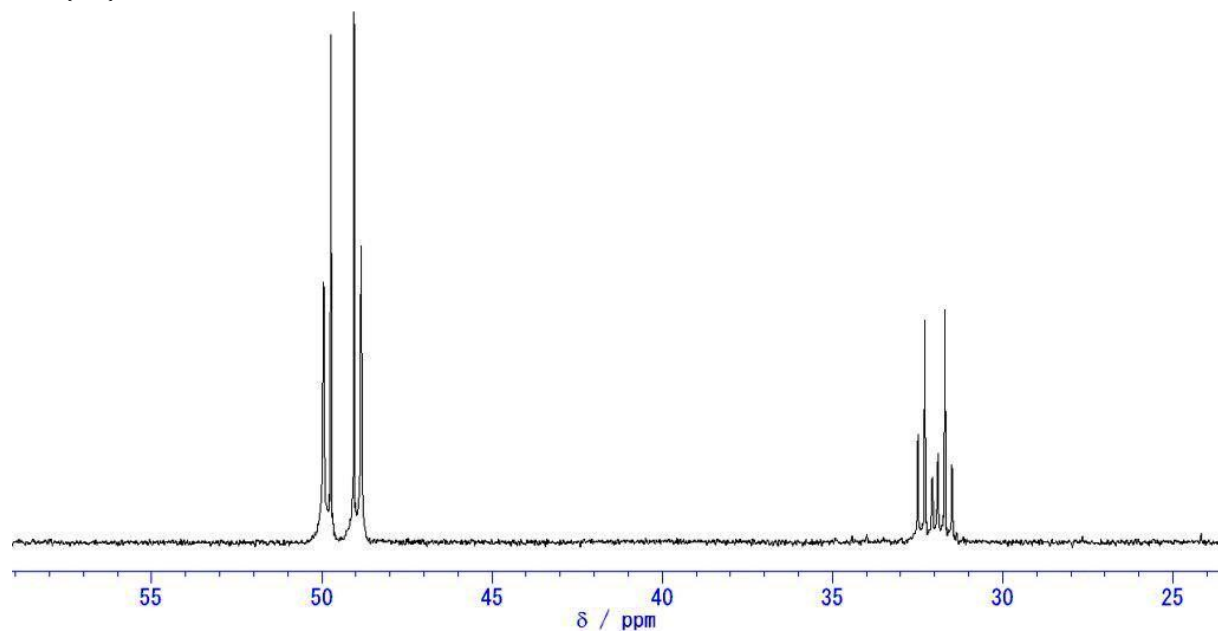

**Figure S31.** NMR spectra of  $\{(o\text{-Ph}_2\text{PC}_6\text{H}_4)_2(\text{Ph})\text{Si}\}\text{Ir}(\text{CO})(\text{PPh}_3)$  (**6a**).

$^1\text{H}$

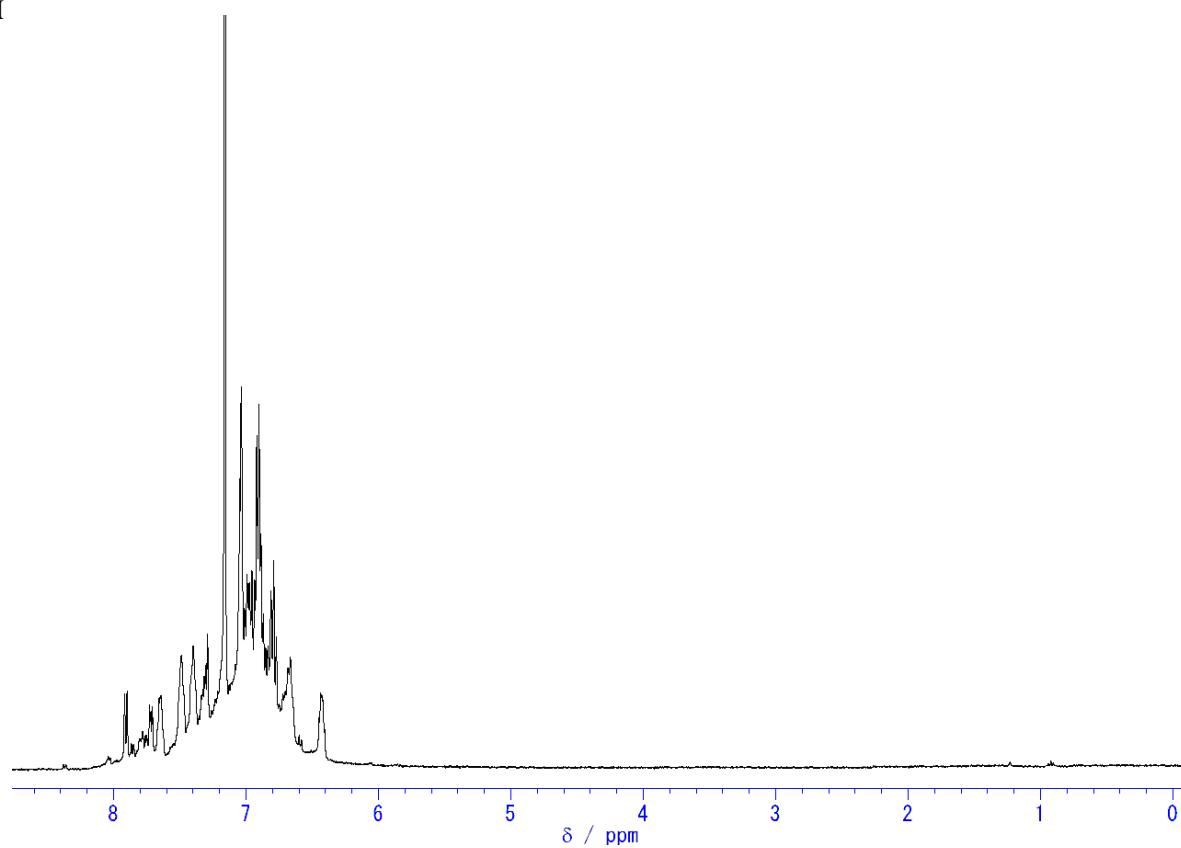

$^{13}\text{C}\{^1\text{H}\}$

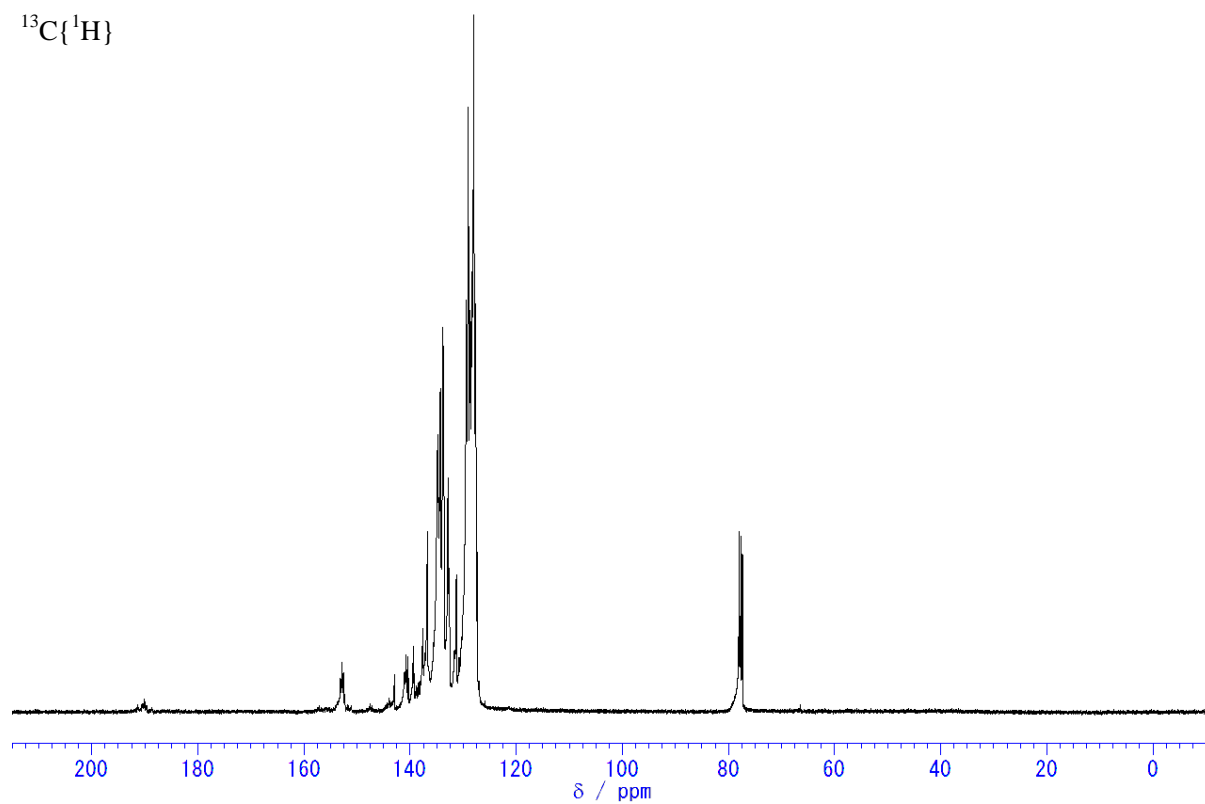



$^{29}\text{Si}\{^1\text{H}\}$

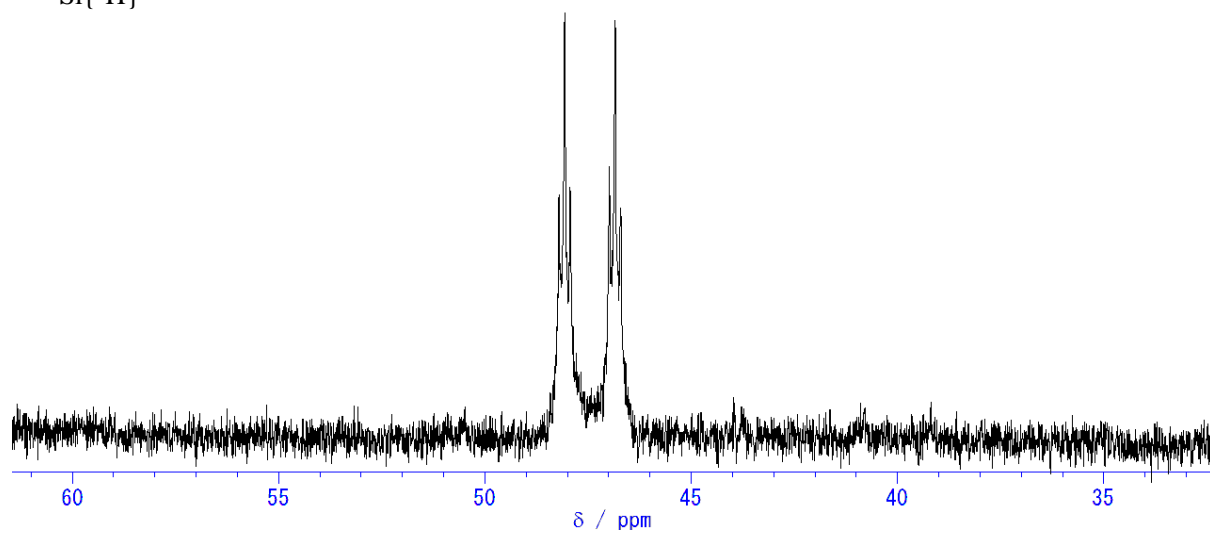

$^{31}\text{P}\{^1\text{H}\}$

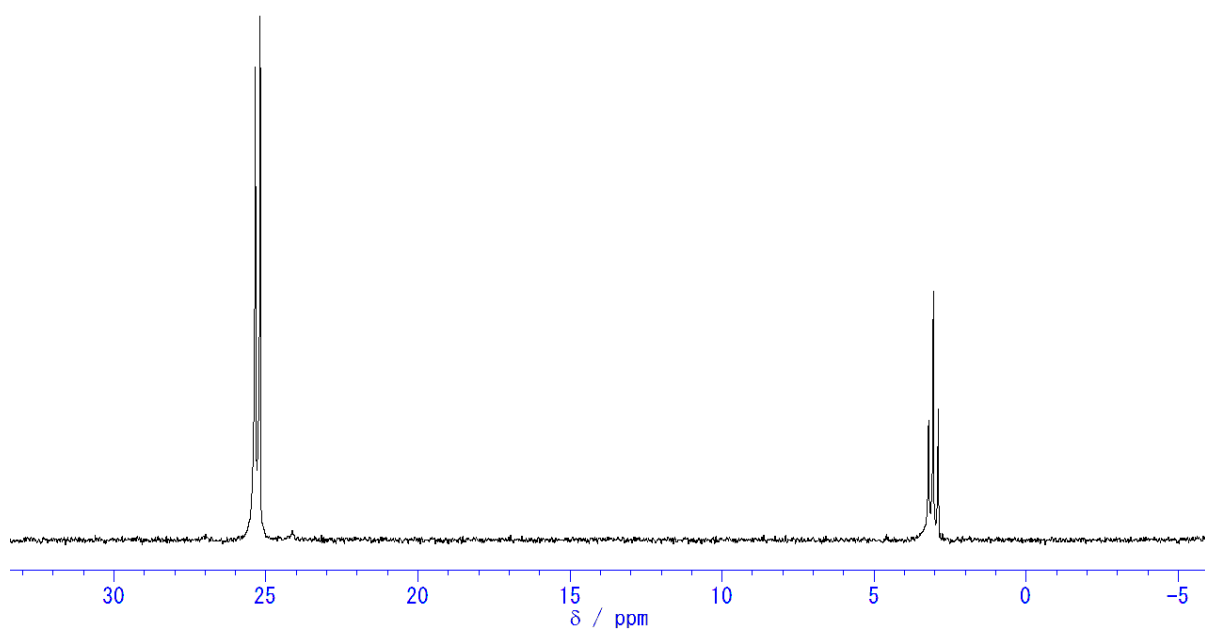

**Figure S32.** NMR spectra of  $\{(o\text{-Ph}_2\text{PC}_6\text{H}_4)_2(\text{Me})\text{Si}\}\text{Ir}(\text{CO})(\text{PPh}_3)$  (**6b**).

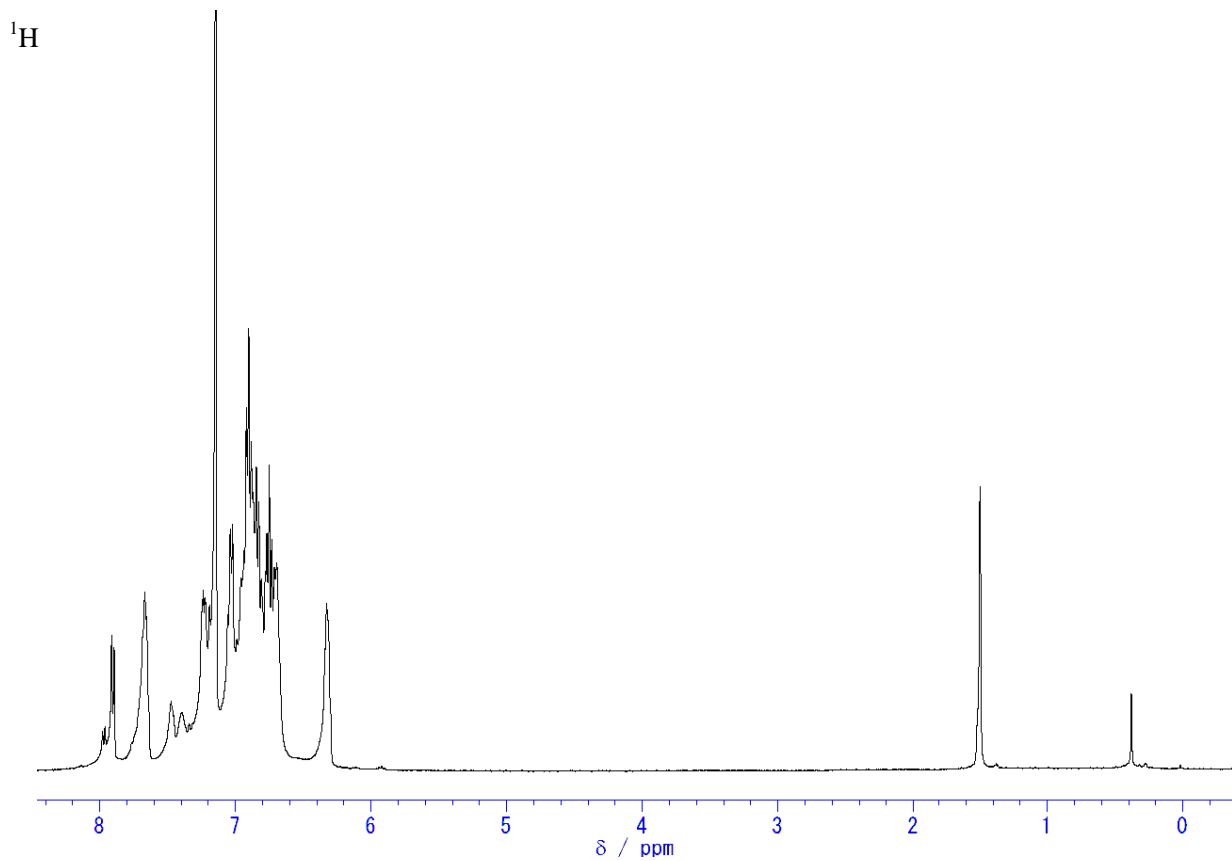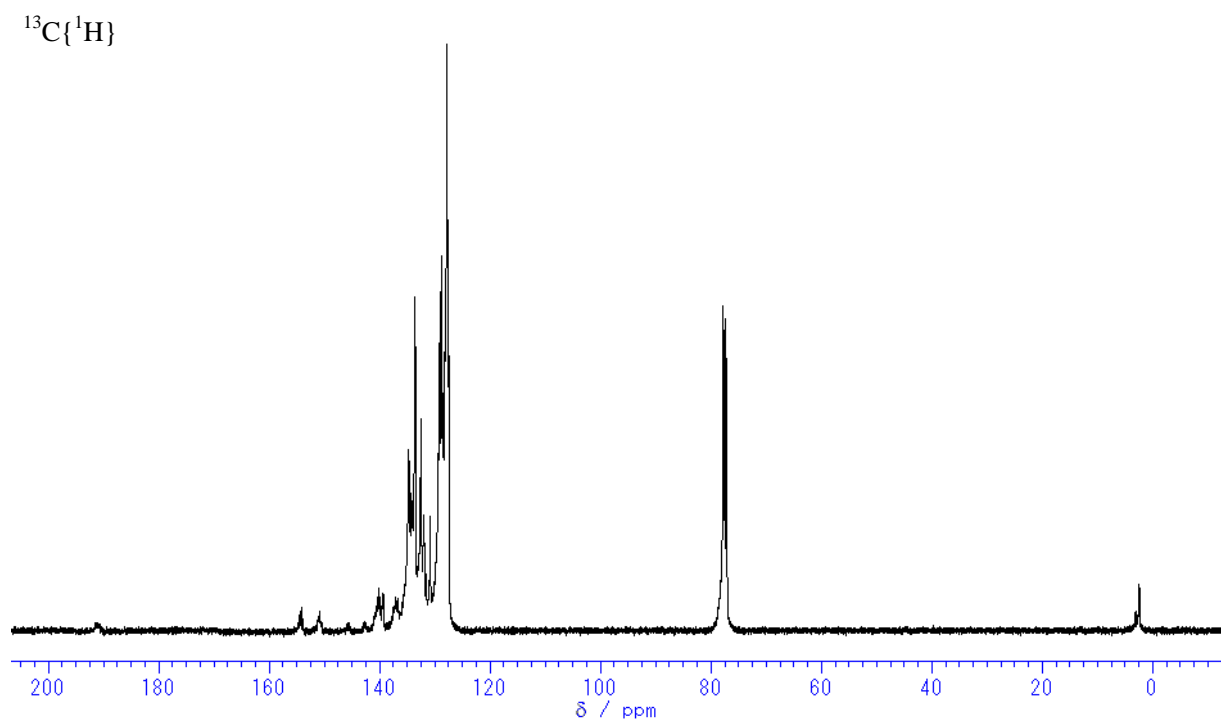

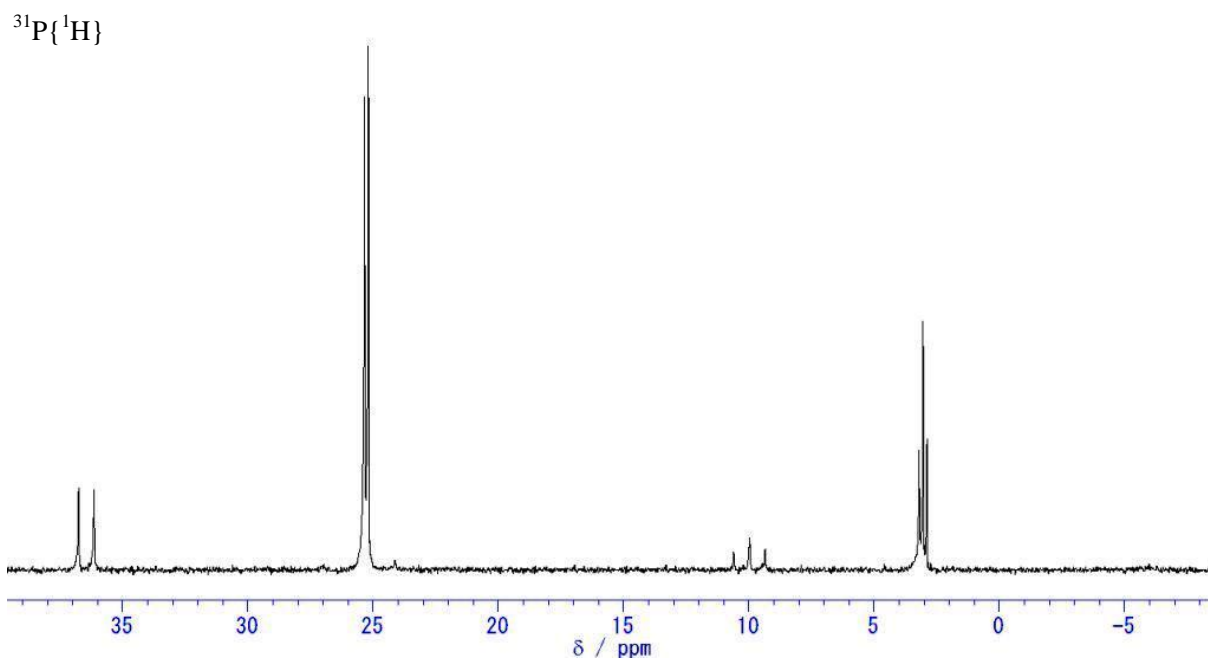

**Figure S33.** NMR spectra of  $\{(o\text{-Ph}_2\text{PC}_6\text{H}_4)_2(\text{Et})\text{Si}\}\text{Ir}(\text{CO})(\text{PPh}_3)$  (**6c**).

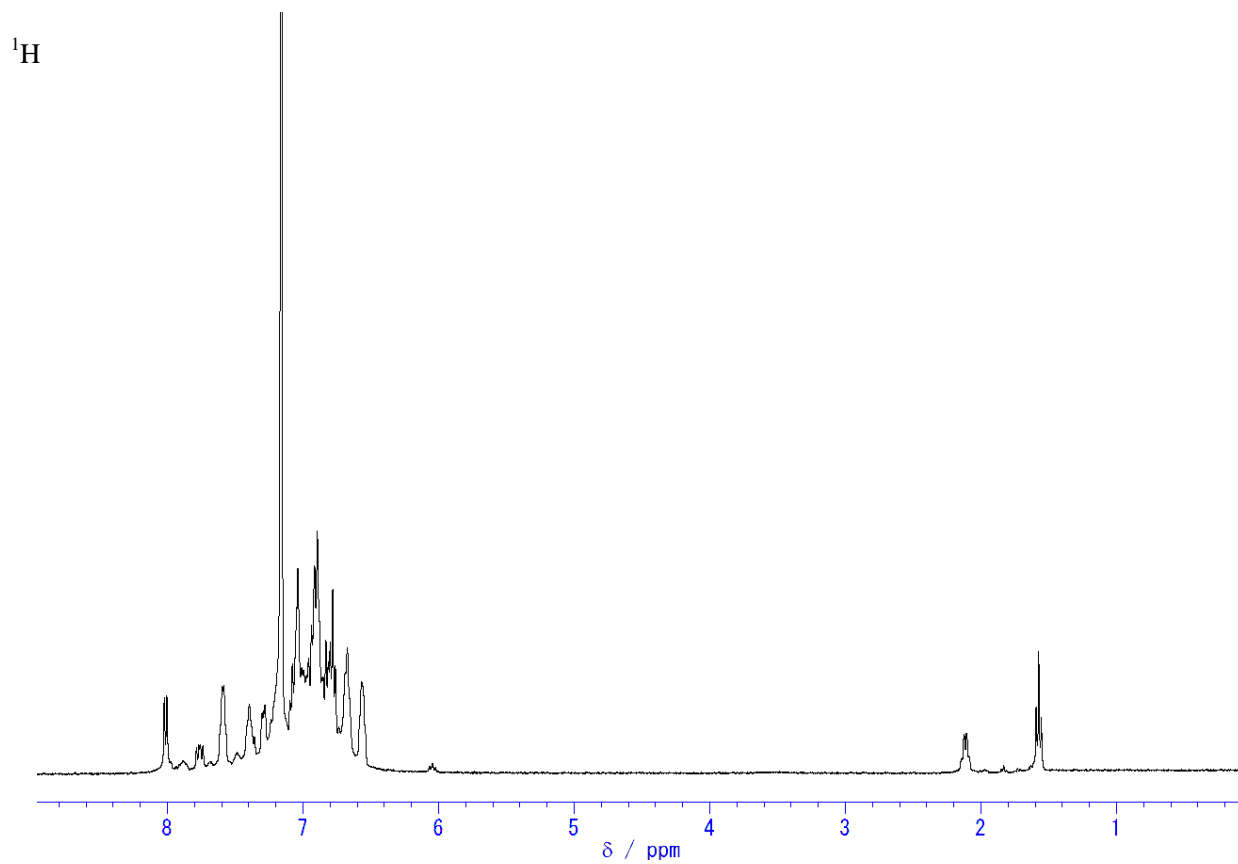

$^{13}\text{C}\{^1\text{H}\}$

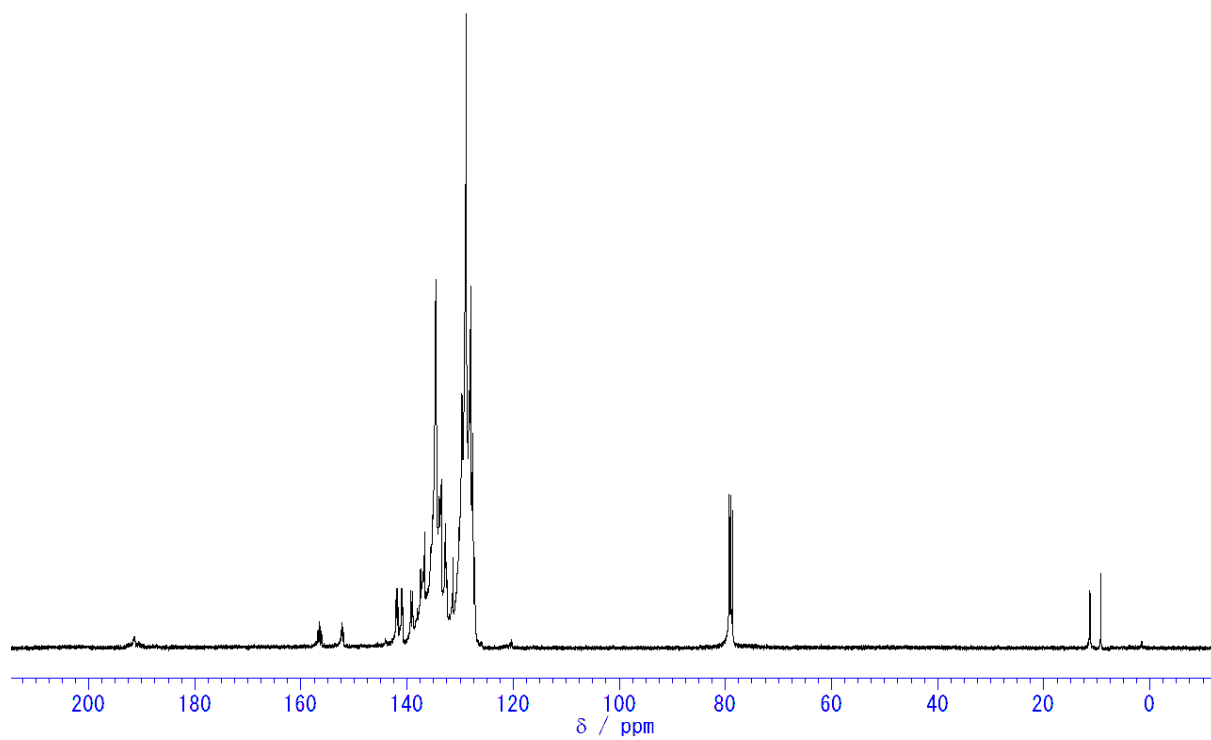

$^{29}\text{Si}\{^1\text{H}\}$

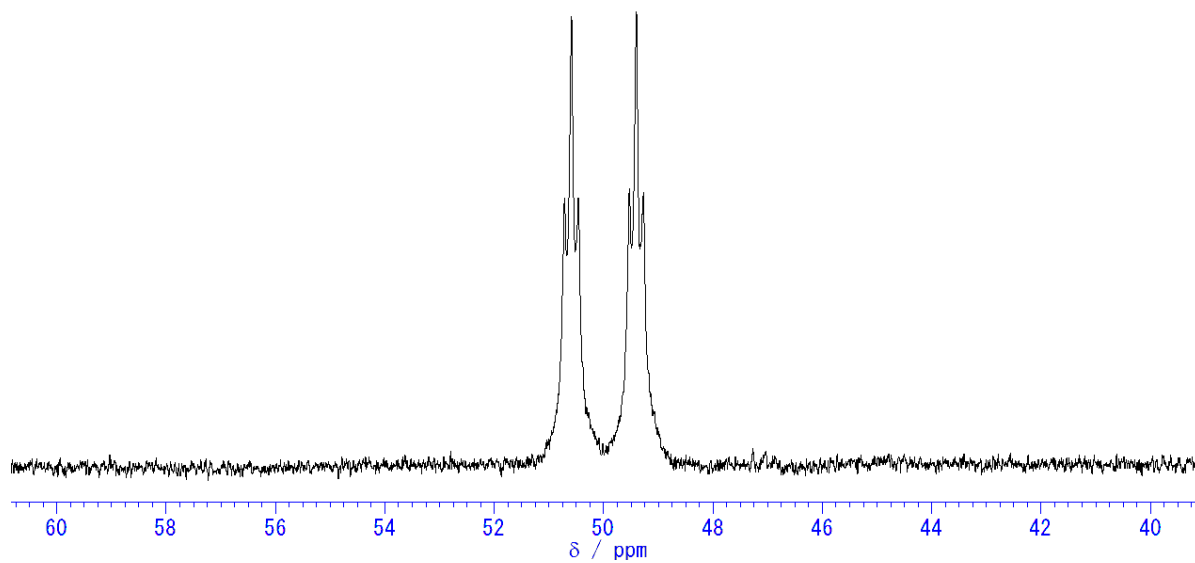

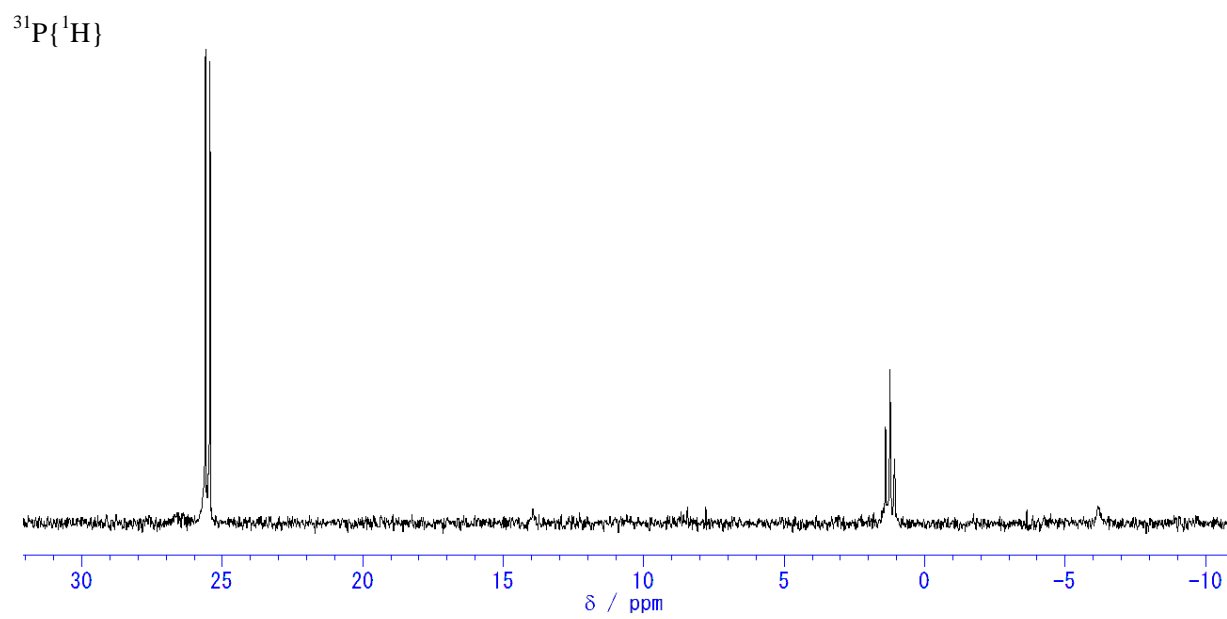

**Table S18.** Cartesian coordinate of **1A**.

|    | X         | Y         | Z        |
|----|-----------|-----------|----------|
| Si | 0.389179  | 0.188617  | 0.45373  |
| C  | 1.188180  | 1.131107  | 1.91232  |
| C  | 2.199760  | 0.421375  | 2.57900  |
| C  | 0.939763  | 2.449705  | 2.34696  |
| C  | 2.946034  | 0.973360  | 3.61310  |
| H  | 2.424330  | -0.596905 | 2.27879  |
| C  | 1.691527  | 3.002168  | 3.38964  |
| C  | 2.692739  | 2.275273  | 4.02002  |
| H  | 3.721926  | 0.387084  | 4.09442  |
| H  | 1.491023  | 4.017743  | 3.71630  |
| H  | 3.264825  | 2.725279  | 4.82465  |
| C  | 1.646397  | 0.323942  | -0.97472 |
| C  | 2.600593  | -0.705280 | -1.02920 |
| C  | 1.791026  | 1.383330  | -1.89758 |
| C  | 3.667204  | -0.693303 | -1.92011 |
| H  | 2.514998  | -1.548463 | -0.35208 |
| C  | 2.872576  | 1.393699  | -2.78581 |
| C  | 3.811995  | 0.370780  | -2.79741 |
| H  | 4.381452  | -1.510245 | -1.92226 |
| H  | 2.981986  | 2.214079  | -3.48837 |
| H  | 4.642842  | 0.406024  | -3.49430 |
| C  | -1.376163 | 0.656607  | -0.00212 |
| H  | -1.705329 | -0.010054 | -0.80714 |
| H  | -2.033025 | 0.476739  | 0.85567  |
| H  | -1.526676 | 1.686622  | -0.33386 |
| C  | 0.248855  | -1.625509 | 0.96060  |
| H  | -0.484193 | -1.707050 | 1.76956  |
| H  | -0.123267 | -2.217758 | 0.11847  |
| H  | 1.170462  | -2.092566 | 1.31294  |
| Rh | -0.513869 | 4.235904  | -0.64205 |
| H  | -0.773460 | 4.792525  | -2.11885 |
| C  | -1.536321 | 5.728278  | -0.24177 |
| O  | -2.166482 | 6.672944  | -0.07673 |
| P  | 0.581314  | 2.773526  | -2.07840 |
| H  | 1.278612  | 3.463224  | -3.09304 |
| H  | -0.366084 | 2.134362  | -2.91665 |
| P  | -0.332783 | 3.529517  | 1.57170  |
| H  | -1.511821 | 2.912073  | 2.06741  |
| H  | -0.292435 | 4.570681  | 2.53013  |

**Table S19.** Cartesian coordinate of **1B**.

|    | X         | Y         | Z         |
|----|-----------|-----------|-----------|
| Si | 0.456757  | 0.410441  | 0.469123  |
| C  | 0.993578  | 1.252739  | 2.092083  |
| C  | 1.081628  | 0.437436  | 3.229910  |
| C  | 1.256491  | 2.630196  | 2.261264  |
| C  | 1.387586  | 0.946589  | 4.488025  |
| H  | 0.898833  | -0.628405 | 3.138701  |
| C  | 1.563144  | 3.137286  | 3.526782  |
| C  | 1.624379  | 2.304986  | 4.638420  |
| H  | 1.436375  | 0.282263  | 5.344686  |
| H  | 1.758730  | 4.198109  | 3.648923  |
| H  | 1.861192  | 2.720042  | 5.612599  |
| C  | 1.659782  | 0.864844  | -0.952868 |
| C  | 2.909166  | 0.229413  | -0.868804 |
| C  | 1.436411  | 1.694262  | -2.072905 |
| C  | 3.898309  | 0.396378  | -1.831165 |
| H  | 3.124035  | -0.413412 | -0.020315 |
| C  | 2.428950  | 1.851408  | -3.045243 |
| C  | 3.654764  | 1.207279  | -2.930894 |
| H  | 4.853639  | -0.105899 | -1.719441 |
| H  | 2.246213  | 2.493245  | -3.901682 |
| H  | 4.413167  | 1.345145  | -3.694489 |
| C  | -1.369738 | 0.739534  | 0.169013  |
| H  | -1.722823 | 0.284243  | -0.761323 |
| H  | -1.923630 | 0.277403  | 0.993802  |
| H  | -1.622635 | 1.808176  | 0.155901  |
| C  | 0.623273  | -1.459358 | 0.682685  |
| H  | -0.126029 | -1.836968 | 1.385175  |
| H  | 0.440486  | -1.946241 | -0.280292 |
| H  | 1.606481  | -1.781339 | 1.034697  |
| Rh | -0.711628 | 4.107875  | -0.485197 |
| H  | -1.928364 | 4.373304  | -1.493593 |
| C  | -1.552074 | 5.452897  | 0.495925  |
| O  | -2.101911 | 6.300037  | 1.038777  |
| P  | -0.077663 | 2.726732  | -2.212128 |
| H  | 0.181533  | 3.346491  | -3.455953 |
| H  | -1.036730 | 1.790429  | -2.668444 |
| P  | 1.167369  | 3.820881  | 0.855491  |
| H  | 1.629132  | 4.966299  | 1.548072  |
| H  | 2.388834  | 3.516165  | 0.200635  |

**Table S20.** Cartesian coordinate of **2A**.

|    | X         | Y         | Z         |
|----|-----------|-----------|-----------|
| Si | 0.543521  | 0.717925  | 0.139453  |
| C  | 1.312433  | 1.109046  | 1.857018  |
| C  | 2.011158  | 0.164405  | 2.621930  |
| C  | 1.190708  | 2.404677  | 2.382825  |
| C  | 2.572227  | 0.495348  | 3.849156  |
| H  | 2.117524  | -0.852930 | 2.256164  |
| C  | 1.752562  | 2.743807  | 3.617049  |
| C  | 2.445269  | 1.789184  | 4.349139  |
| H  | 3.107323  | -0.256013 | 4.421550  |
| H  | 1.645267  | 3.750393  | 4.011132  |
| H  | 2.879146  | 2.050231  | 5.308824  |
| C  | 2.013605  | 0.587186  | -1.090416 |
| C  | 2.942098  | -0.463157 | -1.083122 |
| C  | 2.181739  | 1.593140  | -2.053270 |
| C  | 3.993663  | -0.506130 | -1.989831 |
| H  | 2.842685  | -1.265368 | -0.357512 |
| C  | 3.237644  | 1.556781  | -2.968800 |
| C  | 4.144046  | 0.506065  | -2.935559 |
| H  | 4.699208  | -1.330783 | -1.964103 |
| H  | 3.351382  | 2.343636  | -3.709036 |
| H  | 4.963358  | 0.473217  | -3.646231 |
| C  | -2.197817 | 1.829713  | 0.895515  |
| H  | -1.746729 | 1.349794  | 1.768645  |
| H  | -2.830296 | 2.646397  | 1.251859  |
| H  | -2.827489 | 1.098058  | 0.390231  |
| C  | -0.243491 | -0.994803 | 0.243910  |
| H  | -1.094269 | -0.986035 | 0.929853  |
| H  | -0.607533 | -1.298133 | -0.741648 |
| H  | 0.460810  | -1.757233 | 0.592416  |
| Rh | -0.733563 | 2.612461  | -0.482329 |
| H  | -1.299905 | 1.512542  | -1.473580 |
| C  | -2.044745 | 3.906733  | -1.111880 |
| O  | -2.871285 | 4.591607  | -1.501277 |
| P  | 0.945053  | 2.946219  | -2.043222 |
| H  | 1.777923  | 4.097183  | -2.013947 |
| H  | 0.587069  | 3.037991  | -3.410991 |
| P  | 0.243792  | 3.622509  | 1.385797  |
| H  | -0.613377 | 4.192189  | 2.360868  |
| H  | 1.159870  | 4.706096  | 1.310664  |



**Table S21.** Cartesian coordinate of **3A**.

|    | X         | Y         | Z         |
|----|-----------|-----------|-----------|
| Si | 0.314405  | -0.098507 | 0.428435  |
| C  | 1.009370  | 0.581786  | 2.065376  |
| C  | 1.382045  | -0.292570 | 3.095056  |
| C  | 1.112234  | 1.964340  | 2.322595  |
| C  | 1.822354  | 0.171490  | 4.330423  |
| H  | 1.316276  | -1.364256 | 2.935081  |
| C  | 1.544216  | 2.431264  | 3.566266  |
| C  | 1.899251  | 1.537842  | 4.569725  |
| H  | 2.096977  | -0.534178 | 5.108042  |
| H  | 1.606339  | 3.498806  | 3.754674  |
| H  | 2.234557  | 1.909768  | 5.532351  |
| C  | 1.582693  | 0.333049  | -0.944974 |
| C  | 2.859409  | -0.235111 | -0.819246 |
| C  | 1.345188  | 1.132399  | -2.081316 |
| C  | 3.859715  | -0.030430 | -1.761941 |
| H  | 3.083614  | -0.849521 | 0.048653  |
| C  | 2.350329  | 1.335641  | -3.033284 |
| C  | 3.603654  | 0.757789  | -2.877382 |
| H  | 4.837050  | -0.481704 | -1.623983 |
| H  | 2.155061  | 1.955208  | -3.903403 |
| H  | 4.375134  | 0.927797  | -3.621218 |
| C  | -1.358291 | 0.637958  | 0.143072  |
| H  | -1.886963 | 0.113225  | -0.659893 |
| H  | -1.959648 | 0.500566  | 1.045199  |
| H  | -2.147850 | 2.911786  | 1.002724  |
| C  | 0.292982  | -1.985976 | 0.531408  |
| H  | -0.386337 | -2.322125 | 1.321094  |
| H  | -0.080468 | -2.390324 | -0.414603 |
| H  | 1.276085  | -2.430531 | 0.712228  |
| Rh | -1.291357 | 2.754855  | -0.310802 |
| H  | -2.710595 | 2.411654  | -0.887440 |
| C  | -1.674377 | 4.568937  | -0.710893 |
| O  | -2.005075 | 5.638294  | -0.944314 |
| P  | -0.260708 | 1.996320  | -2.285992 |
| H  | 0.062110  | 2.829567  | -3.385797 |
| H  | -1.022352 | 1.042089  | -3.004268 |
| P  | 0.651836  | 3.154732  | 1.010756  |
| H  | 0.637435  | 4.352213  | 1.763040  |
| H  | 1.910191  | 3.359913  | 0.385228  |

**Table S22.** Cartesian coordinate of **TS(1)**.

|    | X         | Y         | Z         |
|----|-----------|-----------|-----------|
| Si | 0.377004  | 0.226273  | 0.426690  |
| C  | 1.136835  | 1.065406  | 1.964960  |
| C  | 1.838429  | 0.203131  | 2.825641  |
| C  | 1.186865  | 2.444836  | 2.260366  |
| C  | 2.579657  | 0.661581  | 3.907302  |
| H  | 1.809593  | -0.866054 | 2.646350  |
| C  | 1.946209  | 2.900816  | 3.344711  |
| C  | 2.646206  | 2.023775  | 4.161558  |
| H  | 3.106065  | -0.043741 | 4.542186  |
| H  | 1.985948  | 3.963951  | 3.560953  |
| H  | 3.230195  | 2.405251  | 4.992645  |
| C  | 1.681959  | 0.456780  | -0.954382 |
| C  | 2.798376  | -0.387500 | -0.842128 |
| C  | 1.691719  | 1.388311  | -2.012520 |
| C  | 3.877301  | -0.323140 | -1.715430 |
| H  | 2.839295  | -1.116313 | -0.039339 |
| C  | 2.777338  | 1.448896  | -2.893021 |
| C  | 3.868446  | 0.602343  | -2.749270 |
| H  | 4.721143  | -0.992529 | -1.583848 |
| H  | 2.771458  | 2.170729  | -3.703987 |
| H  | 4.701977  | 0.668583  | -3.440667 |
| C  | -1.397819 | 0.713263  | 0.039743  |
| H  | -1.749280 | 0.165743  | -0.841527 |
| H  | -2.021022 | 0.400476  | 0.885421  |
| H  | -1.570923 | 1.781718  | -0.131995 |
| C  | 0.255914  | -1.630614 | 0.759204  |
| H  | -0.403752 | -1.814749 | 1.613342  |
| H  | -0.198836 | -2.109072 | -0.114195 |
| H  | 1.201049  | -2.142534 | 0.950808  |
| Rh | -0.652978 | 4.054198  | -0.786811 |
| H  | -1.298552 | 4.431222  | -2.196715 |
| C  | -1.744769 | 5.467129  | -0.274262 |
| O  | -2.441850 | 6.350284  | -0.049569 |
| P  | 0.325094  | 2.589592  | -2.280318 |
| H  | 0.831461  | 3.209289  | -3.443962 |
| H  | -0.630624 | 1.759985  | -2.917570 |
| P  | 0.199204  | 3.740618  | 1.373437  |
| H  | -0.828614 | 3.863997  | 2.345403  |
| H  | 0.951968  | 4.857507  | 1.813769  |

**Table S23.** Cartesian coordinate of **TS(2)**.

|    | X         | Y         | Z         |
|----|-----------|-----------|-----------|
| Si | 0.342563  | 0.677135  | 0.279277  |
| C  | 1.265442  | 1.314832  | 1.853316  |
| C  | 2.215614  | 0.487445  | 2.472587  |
| C  | 1.041398  | 2.571395  | 2.439909  |
| C  | 2.906004  | 0.884686  | 3.610768  |
| H  | 2.430283  | -0.489456 | 2.052654  |
| C  | 1.718991  | 2.969287  | 3.596563  |
| C  | 2.653821  | 2.128135  | 4.182621  |
| H  | 3.642231  | 0.222047  | 4.054862  |
| H  | 1.522039  | 3.943262  | 4.035585  |
| H  | 3.185538  | 2.441803  | 5.074943  |
| C  | 1.666513  | 0.523222  | -1.147505 |
| C  | 2.292391  | -0.695745 | -1.447656 |
| C  | 2.107098  | 1.649950  | -1.856332 |
| C  | 3.303058  | -0.784169 | -2.400273 |
| H  | 1.982889  | -1.602707 | -0.942646 |
| C  | 3.130482  | 1.574396  | -2.801380 |
| C  | 3.730912  | 0.352442  | -3.077165 |
| H  | 3.754582  | -1.747192 | -2.617922 |
| H  | 3.450042  | 2.465299  | -3.334555 |
| H  | 4.517847  | 0.286378  | -3.821400 |
| C  | -1.713727 | 0.929896  | 0.468474  |
| H  | -1.742844 | 0.685510  | 1.532764  |
| H  | -2.462134 | 1.719024  | 0.326276  |
| H  | -2.053917 | 0.079848  | -0.120706 |
| C  | 0.102307  | -1.182900 | 0.688728  |
| H  | -0.551427 | -1.301072 | 1.556987  |
| H  | -0.370067 | -1.704428 | -0.151403 |
| H  | 1.032925  | -1.709013 | 0.915233  |
| Rh | -0.752009 | 2.880288  | -0.488656 |
| H  | -1.034028 | 2.224178  | -1.903074 |
| C  | -2.111593 | 4.170410  | -0.980084 |
| O  | -2.774129 | 5.010454  | -1.393184 |
| P  | 1.219052  | 3.204251  | -1.500847 |
| H  | 2.230418  | 4.006202  | -0.902944 |
| H  | 1.236546  | 3.839276  | -2.766846 |
| P  | -0.138903 | 3.695365  | 1.607476  |
| H  | -1.103124 | 3.927386  | 2.624481  |
| H  | 0.524609  | 4.942319  | 1.724047  |

**Table S24.** Cartesian coordinate of **TS(3)**.

|    | X         | Y         | Z         |
|----|-----------|-----------|-----------|
| Si | 0.462091  | 0.300499  | 0.374040  |
| C  | 1.173680  | 0.967803  | 2.009719  |
| C  | 1.513593  | 0.079835  | 3.039099  |
| C  | 1.337993  | 2.345669  | 2.260723  |
| C  | 1.979398  | 0.527760  | 4.271342  |
| H  | 1.402204  | -0.988642 | 2.883068  |
| C  | 1.797311  | 2.795245  | 3.500575  |
| C  | 2.117407  | 1.889941  | 4.505537  |
| H  | 2.226594  | -0.187177 | 5.049618  |
| H  | 1.907827  | 3.859561  | 3.684953  |
| H  | 2.473468  | 2.249593  | 5.465380  |
| C  | 1.747535  | 0.665577  | -1.000977 |
| C  | 2.967957  | -0.009177 | -0.835011 |
| C  | 1.619179  | 1.491185  | -2.137036 |
| C  | 4.017166  | 0.117280  | -1.736969 |
| H  | 3.111065  | -0.646039 | 0.033683  |
| C  | 2.674294  | 1.610704  | -3.048170 |
| C  | 3.869178  | 0.930506  | -2.853484 |
| H  | 4.947394  | -0.414568 | -1.565222 |
| H  | 2.561840  | 2.250323  | -3.918366 |
| H  | 4.679262  | 1.040695  | -3.566996 |
| C  | -1.252606 | 1.001718  | 0.183093  |
| H  | -1.803753 | 0.588989  | -0.663308 |
| H  | -1.799858 | 0.674900  | 1.076724  |
| H  | -1.792558 | 2.362883  | 0.706392  |
| C  | 0.364045  | -1.584328 | 0.491495  |
| H  | -0.331377 | -1.885920 | 1.281251  |
| H  | -0.021521 | -1.980794 | -0.453085 |
| H  | 1.325298  | -2.070485 | 0.680120  |
| Rh | -0.990812 | 3.176688  | -0.406393 |
| H  | -2.337227 | 2.967777  | -1.193458 |
| C  | -1.597782 | 4.954972  | -0.323027 |
| O  | -2.014842 | 6.024261  | -0.291464 |
| P  | 0.100850  | 2.499235  | -2.382296 |
| H  | 0.566809  | 3.343822  | -3.422732 |
| H  | -0.657161 | 1.637897  | -3.217701 |
| P  | 0.917482  | 3.549267  | 0.943083  |
| H  | 0.949793  | 4.747378  | 1.694782  |
| H  | 2.186472  | 3.704599  | 0.323992  |
